# Supplementary material for: Improved genome annotation through untargeted detection of pathway-specific metabolites
Source: BMC Genomics. 2011 Jun 15;12(Suppl 1):S6. doi: 10.1186/1471-2164-12-S1-S6 (PMC3223729; doi:10.1186/1471-2164-12-S1-S6)
Supplement: Additional file 1 — Table showing unique formulas and their pathways. [file 1471-2164-12-S1-S6-S1.xlsx]

## Sheet: Sheet1
	Pathway	Metabolites	Unique	Unique	Unique	Unique
			metabolites	metabolites	formulas	formulas
1	arginine biosynthesis III	26	1	<i>N</i>-acetyl-L-citrulline	1	C8 H15 N3 O4
2	uracil degradation (reductive)	10	1	3-ureidopropionate	0
3	histidine biosynthesis	21	7	D-erythro-imidazole-glycerol-phosphate	4	C15 H25 N5 O15 P2
				histidinal		C6 H11 N2 O6 P
				imidazole acetol-phosphate		C6 H12 N3 O4 P
				L-histidinol-phosphate		C6 H9 N2 O5 P
				phosphoribosyl-AMP
				phosphoribosylformiminoAICAR-phosphate
				phosphoribulosylformimino-AICAR-P
4	isoleucine biosynthesis II	20	2	citraconate	0
				&beta;-methyl-D-malate
5	isoleucine biosynthesis III	15	1	methyloxaloacetate	0
6	leucine biosynthesis	16	4	(2<i>R</i>,3<i>S</i>)-3-isopropylmalate	0
				(2<i>S</i>)-2-isopropylmalate
				(2<i>S</i>)-2-isopropyl-3-oxosuccinate
				2-isopropylmaleate
7	lysine biosynthesis I	23	2	<i>N</i>-succinyl-2-amino-6-ketopimelate	2	C11 H15 N O8
				<i>N</i>-succinyl-L,L-2,6-diaminopimelate		C11 H18 N2 O7
8	lysine biosynthesis II	26	2	<i>N</i>-acetyl-L,L-2,6-diaminopimelate	0
				L-2-acetamido-6-oxoheptanedioate
9	lysine biosynthesis III	17	1	L-&alpha;-amino-&epsilon;-keto-pimelate	0
10	lysine biosynthesis V	24	4	<i>N<sup>2</sup></i>-acetyl-&alpha;-aminoadipate	2	C8 H13 N O5
				<i>N<sup>2</sup></i>acetyl-&alpha;-aminoadipyl-&delta;-phosphate		C8 H14 N O8 P
				<i>N<sup>2</sup></i>-acetyl-&alpha;-aminoadipate semialdehyde
				<i>N<sup>2</sup></i>-acetyl-L-Lysine
11	methionine salvage I	16	2	2-hydroxy-3-keto-5-methylthio-1-phosphopentene	0
				5-methylthioribulose-1-phosphate
12	homomethionine biosynthesis	11	2	2-(2'-methylthio)ethylmalic-acid	1	C7 H12 O5 S
				3-(2'-methylthio)ethylmalic-acid
13	serine biosynthesis	10	1	3-phospho-hydroxypyruvate	1	C3 H5 O7 P
14	tryptophan biosynthesis	17	2	1-(o-carboxyphenylamino)-1'-deoxyribulose-5'-phosphate	1	C12 H16 N O9 P
				<i>N</i>-(5'-phosphoribosyl)-anthranilate
15	valine biosynthesis	12	1	2,3-dihydroxy-isovalerate	0
16	1,3,5-trimethoxybenzene biosynthesis	7	3	3,5-dihydroxyanisole	0
				3,5-dimethoxyphenol
				1,3,5-trimethoxybenzene
17	oligomeric urushiol biosynthesis	5	4	urushiol	1	C42 H58 O4
				urushiol quinone
				oligomeric urushiol
				dimeric urushiol
18	2,3-dihydroxybenzoate biosynthesis	9	1	2,3-dihydro-2,3-dihydroxybenzoate	0
19	phaselate biosynthesis	18	1	phaselate	1	C13 H12 O8
20	benzoylanthranilate biosynthesis	4	1	<i>N</i>-benzoylanthranilate	0
21	3-dehydroquinate biosynthesis II (archaea)	12	3	6-deoxy-5-ketofructose-1-phosphate	1	C7 H13 N O5
				2-amino-3,7-dideoxy-D-threo-hept-6-ulosonate
				hydroxypyruvaldehyde phosphate
22	4-hydroxybenzoate biosynthesis I (animals)	14	1	4-hydroxyphenyllactate	0
23	4-hydroxybenzoate biosynthesis V	14	2	3-(4-hydroxyphenyl)-3-hydroxy-propionyl-CoA	0
				3-(4-hydroxyphenyl)-3-oxo-propionyl-CoA
24	2-keto-L-gulonate biosynthesis	6	1	L-sorbosone 2,6-lactone	0
25	Calvin-Benson-Bassham cycle	20	1	D-sedoheptulose-1,7-bisphosphate	0
26	CMP-pseudaminate biosynthesis	17	6	UDP-2-acetamido-2,6-dideoxy-&beta;-L-arabino-hex-4-ulose	4	C10 H18 N2 O5
				UDP-4-amino-4,6-dideoxy-&beta;-L-AltNAc		C13 H22 N2 O8
				UDP-2,4-diacetamido-2,4,6-trideoxy-&beta;-L-altropyranose		C19 H30 N4 O16 P2
				2,4-diacetamido-2,4,6-trideoxy-&beta;-L-altropyranose		C22 H34 N5 O15 P
				pseudaminic acid
				CMP-pseudaminic acid
27	fructan biosynthesis	7	2	1,6-kestotetraose	0
				1,1-kestotetraose
28	fructan degradation	5	1	6<sub>G</sub>,6-kestotetraose	0
29	UDP-D-glucuronate biosynthesis (from <i>myo</i>-inositol)	11	1	&alpha;-D-glucuronate 1-phosphate	0
30	CMP-KDO biosynthesis II (from D-arabinose 5-phosphate)	8	1	3-deoxy-D-<i>manno</i>-octulosonate 8-P	1	C8 H15 O11 P
31	GDP-6-deoxy-D-talose biosynthesis	4	1	GDP-6-deoxy-D-talose	0
32	GDP-&alpha;-D-perosamine biosynthesis	7	1	GDP-D-perosamine	1	C16 H26 N6 O15 P2
33	GDP-L-colitose biosynthesis	6	2	GDP-L-colitose	2	C16 H23 N5 O14 P2
				GDP-4-dehydro-3,6-dideoxymannose		C16 H25 N5 O14 P2
34	CDP-ascarylose biosynthesis	4	2	CDP-ascarylose	0
				CDP-4-dehydro-3,6-dideoxy-D-glucose epimer
35	CDP-3,6-dideoxyhexose biosynthesis	8	1	CDP-4-dehydro-6-deoxy-D-glucose	1	C15 H23 N3 O15 P2
36	CDP-tyvelose biosynthesis	4	1	CDP-tyvelose	0
37	GDP-L-fucose biosynthesis II (from L-fucose)	7	1	&beta;-L-fucose 1-phosphate	0
38	CMP-2-keto-3-deoxy-D-<i>glycero</i>-D-<i>galacto</i>-nononate biosynthesis	12	3	2-keto-3-deoxy-D-<i>glycero</i>-D-<i>galacto</i>-nononate	1	C18 H28 N3 O16 P
				2-keto-3-deoxy-D-<i>glycero</i>-D-<i>galacto</i>-nononate-9-phosphate
				CMP-2-keto-3-deoxy-D-<i>glycero</i>-D-<i>galacto</i>-nononate
39	GDP-D-<i>glycero</i>-&alpha;-D-<i>manno</i>-heptose biosynthesis	11	3	D-<i>glycero</i>-&alpha;-D-<i>manno</i>-heptose 1,7-bisphosphate	1	C17 H27 N5 O17 P2
				D-<i>glycero</i>-&alpha;-D-<i>manno</i>-heptose 1-phosphate
				GDP-D-<i>glycero</i>-&alpha;-D-<i>manno</i>-heptose
40	ADP-L-<i>glycero</i>-&beta;-D-<i>manno</i>-heptose biosynthesis	11	3	ADP-D-glycero-&beta;-D-<i>manno</i>-heptose	0
				D-<i>glycero</i>-&beta;-D-<i>manno</i>-heptose 1,7-diphosphate
				D-<i>glycero</i>-&beta;-D-<i>manno</i>-heptose 1-phosphate
41	CMP-<i>N</i>-acetylneuraminate biosynthesis I (eukaryotes)	14	1	<i>N</i>-acetylneuraminate-9-phosphate	1	C11 H20 N O12 P
42	UDP-L-rhamnose biosynthesis	7	1	UDP-4-dehydro-6-deoxy-D-glucose	0
43	dolichyl-diphosphooligosaccharide biosynthesis	24	13	mannosyl-(<i>N</i>-acetylglucosaminyl)<sub>2</sub>-diphosphodolichol	13	C102 H170 N2 O22 P2
				<i>N</i>-acetylglucosaminyl-diphosphodolichol		C108 H180 N2 O27 P2
				(mannosyl)<sub>2</sub>-(<i>N</i>-acetylglucosaminyl)<sub>2</sub>-diphosphodolichol		C114 H190 N2 O32 P2
				(mannosyl)<sub>3</sub>-(<i>N</i>-acetylglucosaminyl)<sub>2</sub>-diphosphodolichol		C120 H200 N2 O37 P2
				(mannosyl)<sub>4</sub>-(<i>N</i>-acetylglucosaminyl)<sub>2</sub>-diphosphodolichol		C126 H210 N2 O42 P2
				(mannosyl)<sub>5</sub>-(<i>N</i>-acetylglucosaminyl)<sub>2</sub>-diphosphodolichol		C132 H220 N2 O47 P2
				(mannosyl)<sub>6</sub>-(<i>N</i>-acetylglucosaminyl)<sub>2</sub>-diphosphodolichol		C138 H230 N2 O52 P2
				(mannosyl)<sub>7</sub>-(<i>N</i>-acetylglucosaminyl)<sub>2</sub>-diphosphodolichol		C144 H240 N2 O57 P2
				(mannosyl)<sub>8</sub>-(<i>N</i>-acetylglucosaminyl)<sub>2</sub>-diphosphodolichol		C150 H250 N2 O62 P2
				(mannosyl)<sub>9</sub>-(<i>N</i>-acetylglucosaminyl)<sub>2</sub>-diphosphodolichol		C156 H260 N2 O67 P2
				glucosyl-(mannosyl)<sub>9</sub>-(<i>N</i>-acetylglucosaminyl)<sub>2</sub>-diphosphodolichol		C162 H270 N2 O72 P2
				(glucosyl)<sub>2</sub>(mannosyl)<sub>9</sub>-(<i>N</i>-acetylglucosaminyl)<sub>2</sub>-diphosphodolichol		C88 H147 N O12 P2
				(<i>N</i>-acetylglucosaminyl)<sub>2</sub>-diphosphodolichol		C96 H160 N2 O17 P2
44	mannosylfructose biosynthesis	7	2	mannosylfructose-phosphate	1	C12 H22 O14 P
				mannosylfructose
45	carrageenan biosynthesis	7	3	&iota;- carrageenan	3	C24 H38 O27 S2
				&kappa;-carrageenan		C24 H38 O31 S4
				&nu;- carrageenan		C24 H42 O39 S6
46	enterobacterial common antigen biosynthesis	25	4	undecaprenyl <i>N</i>-acetyl-glucosaminyl-<i>N</i>-acetyl-mannosaminuronate pyrophosphate	3	C18 H29 N3 O15 P2
				undecaprenyl <i>N</i>-acetyl-glucosaminyl-<i>N</i>-acetyl-mannosaminuronate-4-acetamido-4,6-dideoxy-D-galactose pyrophosphate		C71 H116 N2 O18 P2
				dTDP-D-fucosamine		C79 H129 N3 O22 P2
				dTDP-4-acetamido-4,6-dideoxy-D-galactose
47	teichoic acid (poly-glycerol) biosynthesis	15	2	prenyl-P-P-GlcNAc-ManNAc	2	C71 H118 N2 O17 P2
				prenyl-P-P-GlcNAc-ManNAc-P-Gro		C74 H125 N2 O22 P3
48	UDP-<i>N</i>-acetylmuramoyl-pentapeptide biosynthesis II (lysine-containing)	19	1	UDP-<i>N</i>-acetylmuramoyl-L-alanyl-&gamma;-D-glutamyl-L-lysine	1	C34 H55 N7 O24 P2
49	UDP-<i>N</i>-acetylmuramoyl-pentapeptide biosynthesis III (<i>meso</i>-DAP-containing)	19	1	UDP-<i>N</i>-acetylmuramoyl-L-alanyl-D-glutamyl-<I>meso</I>-2,6-diaminopimelyl-D-alanyl-D-alanine	1	C41 H65 N9 O28 P2
50	mycolyl-arabinogalactan-peptidoglycan complex biosynthesis	29	14	rhamnosyl-<i>N</i>-acetyl-glucosaminyl-decaprenyl diphosphate	13	C244 H407 N O166 P2
				galactofuranosyl-rhamnosyl-<i>N</i>-acetyl-glucosaminyl-decaprenyl diphosphate		C259 H429 N O178 P2
				&beta;-D-Gal<i>f</i>-(1->5)-&beta;-D-Gal<i>f</i>-rhamnosyl-<i>N</i>-acetyl-glucosaminyl-decaprenyl diphosphate		C409 H669 N O298 P2
				decaprenyl-phosphoryl-&beta;-D-5-phosphoribose		C484 H789 N O358 P2
				decaprenyl-phosphoryl-&beta;-D-ribose		C514 H837 N O382 P2
				decaprenyl-phosphoryl-2-keto-&beta;-D-<i>erythro</i>-pentofuranose		C519 H845 N O386 P2
				decaprenyl-phosphoryl-&beta;-D-arabinofuranose		C55 H89 O8 P
				(Gal<i>f</i>)<sub>30</sub>-Rha-GlcNAc-P-P-C<sub>50</sub>		C55 H91 O8 P
				arabinogalactan containing &alpha;(1->3) arabinofuran linkages		C55 H92 O11 P2
				arabinogalactan containing linear arabinofuran		C58 H97 N O12 P2
				arabinogalactan primed with arabinofuran		C64 H107 N O16 P2
				arabinogalactan containing &alpha;(1->3) and &beta;(1->2) arabinofuran linkages		C70 H117 N O21 P2
				arabinogalactan containing extended &alpha;(1->3) arabinofuran linkages		C76 H127 N O26 P2
				mono-<i>trans</i>, poly-<i>cis</i>-decaprenyl-<i>N</i>-acetyl-&alpha;-D-glucosaminyl-pyrophosphate
51	vancomycin resistance I	11	1	D-alanyl-D-lactate	0
52	vancomycin resistance II	9	1	D-alanyl-D-serine	0
53	peptidoglycan cross-bridge biosynthesis I (S. aureus)	4	3	<i>N</i>-acetylmuramoyl-L-alanyl-D-isoglutaminyl-L-lysyl-(glycyl)-D-alanyl-D-alanine-diphosphoundecaprenyl-<i>N</i>-acetylglucosamine	3	C100 H166 N12 O28 P2
				<i>N</i>-acetylmuramoyl-L-alanyl-D-isoglutaminyl-L-lysyl-(glycyl)<sub>3</sub>-D-alanyl-D-alanine-diphosphoundecaprenyl-<i>N</i>-acetylglucosamine		C104 H172 N14 O30 P2
				<i>N</i>-acetylmuramoyl-L-alanyl-D-isoglutaminyl-L-lysyl-(glycyl)<sub>5</sub>-D-alanyl-D-alanine-diphosphoundecaprenyl-<i>N</i>-acetylglucosamine		C96 H160 N10 O26 P2
54	peptidoglycan cross-bridge biosynthesis II (E. faecium)	10	2	<i>N</i>-acetylmuramoyl-L-alanyl-D-isoglutaminyl-N-(&beta;-D-asparaginyl)-L-lysyl-D-alanyl-D-alanine-diphosphoundecaprenyl-<i>N</i>-acetylglucosamine	2	C98 H162 N10 O28 P2
				<i>N</i>-acetylmuramoyl-L-alanyl-D-isoglutaminyl-N-(&beta;-D-asparatyl)-L-lysyl-D-alanyl-D-alanine-diphosphoundecaprenyl-<i>N</i>-acetylglucosamine		C98 H163 N11 O27 P2
55	peptidoglycan cross-bridge biosynthesis III (Enterococcus faecalis)	3	2	UDP-<i>N</i>-acetylmuramoyl-L-alanyl-D-isglutaminyl-N<sup>6</sup>-(L-alanyl-L-alanyl)-L-lysyl-D-alanyl-D-alanine	2	C100 H167 N11 O27 P2
				<i>N</i>-acetylmuramoyl-L-alanyl-D-isoglutaminyl-N<sup>6</sup>-(L-alanyl)-L-lysyl-D-alanyl-D-alanine-diphosphoundecaprenyl-<i>N</i>-acetylglucosamine		C97 H162 N10 O26 P2
56	peptidoglycan cross-bridge biosynthesis IV (Weissella viridescens)	3	2	UDP-<i>N</i>-acetylmuramoyl-L-alanyl-D-glutamyl-N<sup>6</sup>-(L-alanyl-L-seryl)-L-lysyl-D-alanyl-D-alanine	2	C43 H70 N10 O27 P2
				UDP-<i>N</i>-acetylmuramoyl-L-alanyl-D-glutamyl-N<sup>6</sup>-(L-alanyl)-L-lysyl-D-alanyl-D-alanine		C46 H75 N11 O29 P2
57	lipid IV<sub>A</sub> biosynthesis	14	5	lipid A disaccharide	4	C29 H51 N3 O18 P2
				2,3-bis[(3<i>R</i>)-3-hydroxymyristoyl]-&beta;-D-glucosaminyl 1-phosphate		C31 H53 N3 O19 P2
				UDP-2,3-bis[(3<i>R</i>)-3-hydroxymyristoyl]-&alpha;-D-glucosamine		C43 H77 N3 O20 P2
				UDP-3-<i>O</i>-[(3<i>R</i>)-3-hydroxymyristoyl]-N-acetylglucosamine		C68 H129 N2 O20 P
				UDP-3-<i>O</i>-[(3<i>R</i>)-3-hydroxymyristoyl]-D-glucosamine
58	biosynthesis of 4-amino-4-deoxy-L-arabinose-modified lipid A	18	4	UDP-&beta;-L-threo-pentapyranos-4-ulose	4	C14 H20 N2 O16 P2
				4-deoxy-4-formamido-&beta;-L-arabinopyranosyl undecaprenyl phosphate		C14 H23 N3 O15 P2
				UDP-4-amino-4-deoxy-&beta;-L-arabinopyranose		C15 H23 N3 O16 P2
				UDP-4-deoxy-4-formamido-&beta;-L-arabinopyranose		C61 H101 N O8 P
59	UDP-<i>N</i>-acetyl-D-glucosamine biosynthesis I	12	1	D-glucosamine 1-phosphate	0
60	cutin biosynthesis	18	7	9,10,18-trihydroxystearate	5	C16 H30 O3
				9,10-epoxy-18-hydroxystearate		C16 H30 O4
				10,16-dihydroxypalmitate		C16 H32 O4
				hexadecanedioate		C18 H34 O4
				16-oxo-palmitate		C18 H36 O5
				9,10-epoxystearate
				9,10-dihydroxystearate
61	phenylpropanoid biosynthesis	28	1	coumaraldehyde	0
62	coenzyme B biosynthesis	28	11	dihomocitrate	7	C11 H21 N O4 S
				<I>cis</I>-(homo)<SUB>2</SUB>aconitate		C7 H14 O2 S
				(-)<I>threo</I>-iso(homo)<SUB>2</SUB>citrate		C8 H10 O6
				2-oxopimelate		C8 H12 O5
				trihomocitrate		C8 H12 O7
				<I>cis</I>-(homo)<SUB>3</SUB>aconitate		C9 H12 O6
				(-)<I>threo</I>-iso(homo)<SUB>3</SUB>citrate		C9 H14 O7
				2-oxosuberate
				7-oxoheptanoate
				7-mercaptoheptanoate
				7-mercaptoheptanoylthreonine
63	coenzyme M biosynthesis	16	2	2-(sulfomethyl)thiazolidine-4-carboxylate	2	C5 H11 N O5 S2
				sulfoethylcysteine		C5 H9 N O5 S2
64	factor 420 biosynthesis	17	3	(2<i>S</i>)-lactyl-2-diphospho-5'-guanosine	1	C16 H17 N3 O7
				7,8-didemethyl-8-hydroxy-5-deazariboflavin
				(2<i>S</i>)-2-phospholactate
65	factor 420 polyglutamylation	7	2	factor F<sub>420</sub>-0	2	C19 H22 N3 O12 P
				factor &gamma;-F<sub>420</sub>-1		C24 H29 N4 O15 P
66	coenzyme B/coenzyme M regeneration	5	2	methanophenazine	2	C37 H50 N2 O
				dihydromethanophenazine		C37 H52 N2 O
67	methanofuran biosynthesis	28	14	methanofuran biosynththesis intermediate MF1	12	C10 H12 O9
				methanofuran biosynththesis intermediate MF2		C10 H14 O8
				methanofuran biosynththesis intermediate MF3		C10 H14 O9
				phosphate-ester-of-dihydrofuran		C14 H18 N2 O2
				2,4-substituted-furan		C19 H25 N3 O5
				pentane-1,3,4,5-tetracarboxylate		C24 H32 N4 O8
				hexane-6-keto-1,3,4,6-tetracarboxylate		C6 H10 N O5 P
				hexane-6-ol-1,3,4,6-tetracarboxylate		C6 H14 O13 P2
				hexane-1,3,4,6-tetracarboxylate		C6 H7 O6 P
				2-furaldehyde		C6 H7 O7 P
				2-methylamine-furan		C6 H9 O8 P
				<i>p</i>-(&beta;-aminoethyl)phenoxy-methyl-2-(aminomethyl)furan		C9 H12 O8
				4-[<i>N</i>-&gamma;-L-glutamyl-)-<i>p</i>-(&beta;-aminoethyl)phenoxy-methyl]-2-(aminomethyl)furan
				4-[<i>N</i>-&gamma;-L-glutamyl-&gamma;-L-glutamyl-)-<i>p</i>-(&beta;-aminoethyl)phenoxy-methyl]-2-(aminomethyl)furan
68	molybdenum cofactor biosynthesis	11	3	molybdopterin	2	C10 H14 N5 O6 P S2
				molybdopterin-AMP		C20 H26 N10 O12 P2 S2
				cyclic pyranopterin monophosphate
69	vitamin B<sub>6</sub> degradation	21	5	3-hydroxy-2-methylpyridine-5-carboxylate	1	C7 H9 N O5
				3-hydroxy-2-methylpyridine-4,5-dicarboxylate
				4-pyridoxolactone
				2-(acetamidomethylene)succinate
				5-formyl-3-hydroxy-2-methylpyidine-4-carboxylate
70	phycoerythrobilin biosynthesis	6	1	15,16-dihydrobiliverdin	0
71	phycocyanobilin biosynthesis	5	1	(3Z)-phycocyanobilin	1	C34 H40 N4 O6
72	tetrahydromethanopterin biosynthesis	23	8	7,8-H<sub>2</sub>pterin-6-yl-methyl-4-(&beta;-D-ribofuranosyl)aminobenzene 5'-phosphate	8	C11 H16 N O7 P
				7,8-H<sub>2</sub>pterin-6-ylmethyl-l-(4-aminophenyl)-1-deoxy-D-ribitol 5'-phosphate		C18 H21 N6 O8 P
				7,8-H<sub>2</sub>pterin-6-ylmethyl-l-(4-aminophenyl)-1-deoxy-D-ribitol		C18 H22 N6 O5
				7,8-H<sub>2</sub>pterin-6-ylmethyl-l-(4-aminophenyl)-1-deoxy-5-[1-&alpha; -D- ribofuranosyl 5-phosphate]-D-ribitol		C18 H23 N6 O8 P
				7,8-H<sub>2</sub>pterin-6-ylmethyl-l-(4-aminophenyl)-1-deoxy-5-[1-&alpha; -D- ribofuranosyl triphosphate]-D-ribitol		C23 H31 N6 O12 P
				demethylated 7,8-dihydromethanopterin		C23 H34 N6 O18 P3
				dihydromethanopterin		C28 H37 N6 O16 P
				4-(&beta;-D-ribofuranosyl)aminobenzene-5'-phosphate		C30 H43 N6 O16 P
73	mevalonate pathway II (archaea)	16	1	isopentenyl phosphate	1	C5 H11 O4 P
74	pyrroloquinoline quinone biosynthesis	9	4	2-amino-4-[5-(2-amino-2-carboxylatoethyl)-2-hydroxyphenyl]pentanedioate	3	C14 H16 N2 O6
				2-amino-4-[3-(2-amino-2-carboxylatoethyl)-6-oxocyclohexa-1,4-dien-1-yl]pentanedioate		C14 H16 N2 O8
				6-(2-amino-2-carboxylatoethyl)-1,2,3,4-tetrahydroquinoline-2,4-dicarboxylate		C14 H18 N2 O7
				6-(2-amino-2-carboxylatoethyl)-7-hydroxy-8-oxo-1,2,3,4,7,8-hexahydroquinoline-2,4-dicarboxylate
75	mevalonate pathway I	16	1	mevalonate-diphosphate	1	C6 H14 O10 P2
76	tetrahydromonapterin biosynthesis	8	2	tetrahydromonapterin	0
				7,8-dihydromonapterin triphosphate
77	coenzyme A biosynthesis	14	2	D-4'-phosphopantothenate	2	C12 H23 N2 O9 P S
				R-4'-phosphopantothenoyl-L-cysteine		C9 H18 N O8 P
78	pyridine nucleotide cycling (plants)	20	1	nicotinate riboside	1	C11 H13 N O6
79	methylerythritol phosphate pathway	20	3	2-C-methyl-D-erythritol-4-phosphate	3	C14 H25 N3 O14 P2
				2-phospho-4-(cytidine 5'-diphospho)-2-C-methyl-D-erythritol		C14 H26 N3 O17 P3
				4-(cytidine 5'-diphospho)-2-C-methyl-D-erythritol		C5 H13 O7 P
80	mono-<i>trans</i>, poly-<i>cis</i> decaprenyl phosphate biosynthesis	9	2	mono-<i>trans</i>, poly-<i>cis</i>-decaprenyl diphosphate	0
				2-<i>cis</i>,6-<i>trans</i>-farnesyl diphosphate
81	siroheme amide biosynthesis	8	1	siroamide	1	C42 H47 N5 O15
82	vitamin E biosynthesis	15	5	&beta;-tocopherol	0
				&delta;-tocopherol
				2,3-dimethyl-6-phytyl-1,4-benzoquinone
				&gamma;-tocopherol
				2-methyl-6-phytyl-1,4-benzoquinone
83	demethylmenaquinone-9 biosynthesis	7	1	demethylmenaquinone-9	1	C55 H78 O2
84	demethylmenaquinone-6 biosynthesis	7	1	demethylmenaquinone-6	0
85	demethylmenaquinone-8 biosynthesis II	13	4	futalosine	3	C14 H14 O7
				dehypoxanthine futalosine		C14 H16 O7
				cyclic dehypoxanthinylfutalosine		C19 H17 N4 O7
				1,4-dihydroxy-6-naphthoate
86	menaquinone-8 biosynthesis	5	1	menaquinol-8	1	C51 H74 O2
87	menaquinone-9 biosynthesis	6	2	menaquinol-<i>9</i>	2	C56 H80 O2
				menaquinone-<i>9</i>		C56 H82 O2
88	menaquinone-6 biosynthesis	6	2	menaquinol-<i>6</i>	1	C41 H56 O2
				menaquinone-<i>6</i>
89	menaquinone-10 biosynthesis	11	4	demethylmenaquinol-10	4	C60 H86 O2
				menaquinol-<i>10</i>		C60 H88 O2
				menaquinone-<i>10</i>		C61 H88 O2
				demethylmenaquinone-10		C61 H90 O2
90	menaquinone-11 biosynthesis	11	4	demethylmenaquinol-11	4	C65 H94 O2
				menaquinol-<i>11</i>		C65 H96 O2
				menaquinone-<i>11</i>		C66 H96 O2
				demethylmenaquinone-11		C66 H98 O2
91	menaquinone-12 biosynthesis	11	4	demethylmenaquinol-12	4	C70 H102 O2
				menaquinol-<i>12</i>		C70 H104 O2
				menaquinone-<i>12</i>		C71 H104 O2
				demethylmenaquinone-12		C71 H106 O2
92	menaquinone-13 biosynthesis	11	4	demethylmenaquinol-13	4	C75 H110 O2
				menaquinol-<i>13</i>		C75 H112 O2
				menaquinone-<i>13</i>		C76 H112 O2
				demethylmenaquinone-13		C76 H114 O2
93	phylloquinone biosynthesis	9	1	demethylphylloquinone	1	C30 H44 O2
94	plastoquinone biosynthesis	11	2	2-methyl-6-solanyl-1,4-benzoquinone	2	C52 H82 O2
				plastoquinone-9		C53 H80 O2
95	rhodoquinone-10 biosynthesis	6	1	rhodoquinone-10	1	C58 H89 N O3
96	rhodoquinone-9 biosynthesis	6	1	rhodoquinone-9	1	C53 H81 N O3
97	ubiquinone-7 biosynthesis (prokaryotic)	17	2	2-heptaprenylphenol	1	C41 H62 O2
				2-heptaprenyl-6-hydroxyphenol
98	ubiquinone-9 biosynthesis (prokaryotic)	17	2	2-nonaprenylphenol	2	C51 H78 O
				2-nonaprenyl-6-hydroxyphenol		C51 H78 O2
99	ubiquinone-10 biosynthesis (prokaryotic)	17	2	2-decaprenylphenol	2	C56 H86 O
				2-decaprenyl-6-hydroxyphenol		C56 H86 O2
100	ubiquinone-8 biosynthesis (eukaryotic)	19	2	3-octaprenyl-4,5-dihydroxybenzoate	2	C47 H70 O4
				3-octaprenyl-4-hydroxy-5-methoxybenzoate		C48 H72 O4
101	ubiquinone-9 biosynthesis (eukaryotic)	17	2	3-nonaprenyl-4,5-dihydroxybenzoate	2	C52 H78 O4
				3-nonaprenyl-4-hydroxy-5-methoxybenzoate		C53 H80 O4
102	ubiquinone-10 biosynthesis (eukaryotic)	17	2	3-decaprenyl-4,5-dihydroxybenzoate	2	C57 H86 O4
				3-decaprenyl-4-hydroxy-5-methoxybenzoate		C58 H88 O4
103	ubiquinone-7 biosynthesis (eukaryotic)	17	2	3-heptaprenyl-4,5-dihydroxybenzoate	2	C42 H62 O4
				3-heptaprenyl-4-hydroxy-5-methoxybenzoate		C43 H64 O4
104	ubiquinone-6 biosynthesis (eukaryotic)	17	9	2-hexaprenyl-3-methyl-5-hydroxy-6-methoxy-1,4-benzoquinol	9	C37 H54 O3
				2-hexaprenyl-3-methyl-6-methoxy-1,4-benzoquinol		C37 H54 O4
				2-hexaprenyl-6-methoxy-1,4-benzoquinol		C37 H56 O2
				2-hexaprenyl-6-methoxyphenol		C37 H56 O3
				3-hexaprenyl-4,5-dihydroxybenzoate		C38 H56 O4
				3-hexaprenyl-4-hydroxy-5-methoxybenzoate		C38 H58 O3
				3-hexaprenyl-4-hydroxybenzoate		C38 H58 O4
				ubiquinol-6		C39 H58 O4
				ubiquinone-<i>6</i>		C39 H60 O4
105	ubiquinol-8 biosynthesis (prokaryotic)	18	2	2-octaprenyl-6-hydroxyphenol	2	C46 H70 O
				2-octaprenylphenol		C46 H70 O2
106	glutathione amide metabolism	9	3	glutathione amide	3	C10 H18 N4 O5 S
				glutathione amide disulfide		C10 H18 N4 O5 S2
				glutathione amide perthiol		C20 H34 N8 O10 S2
107	mycothiol biosynthesis	17	3	1-<i>O</i>-(2-acetamido-2-deoxy-&alpha;-D-glucopyranosyl)-D-<i>myo</i>-inositol-3-phosphate	2	C14 H26 N O14 P
				1-(2-acetamido-2-deoxy-&alpha;-D-glucopyranosyl)-1D-myo-inositol		C15 H28 N2 O11 S
				desacetylmycothiol
108	tetrahydrobiopterin biosynthesis II	11	1	6-lactoyl-5,6,7,8-tetrahydropterin	0
109	tetrapyrrole biosynthesis I	14	1	glutamate-1-semialdehyde	0
110	1,25-dihydroxyvitamin D<sub>3</sub> biosynthesis	10	4	calcidiol	0
				pre-vitamin D<sub>3</sub>
				7-dehydro-cholesterol
				vitamin D<SUB>3</SUB>
111	L-ascorbate biosynthesis V	5	1	L-sorbosone 1,4-lactone	0
112	ascorbate biosynthesis II (L-gulose pathway)	9	2	L-gulose-1-P	0
				L-gulose
113	biotin biosynthesis I	15	4	7-keto-8-aminopelargonate	3	C10 H18 N2 O3
				dethiobiotin		C15 H19 N5 O6 S
				7,8-diaminopelargonate		C9 H17 N O3
				S-adenosyl-4-methylthio-2-oxobutanoate
114	aminopropanol phosphate biosynthesis	12	1	L-threonine O-3-phosphate	1	C4 H9 N O6 P
115	flavin biosynthesis II (archaea)	20	1	2-amino-5-formylamino-6-(D-ribosylamino)pyrimidin-4(3H)-one 5'-phosphate	1	C10 H16 N5 O9 P
116	flavin biosynthesis I (bacteria)	20	1	5-amino-6-(5'-phosphoribosylamino)uracil	1	C9 H15 N4 O9 P
117	6-hydroxymethyl-dihydropterin diphosphate biosynthesis	13	1	dihydroneopterin phosphate	1	C9 H14 N5 O7 P
118	thiamin biosynthesis I	27	2	4-hydroxybenzyl alcohol	1	C2 H3 N O2
				iminoacetate
119	thiamine biosynthesis II	22	1	2-carboxylate-4-methyl-5-beta-(ethyl adenosine 5-diphosphate) thiazole	1	C17 H22 N6 O12 P2 S
120	pyridoxal 5'-phosphate biosynthesis I	20	5	3-amino-1-hydroxyacetone-1-phosphate	3	C3 H8 N O5 P
				<i>(2S)</i>-2-amino-3-oxo-4-phosphonooxybutanoate		C4 H10 N O7 P
				2-oxo-3-hydroxy-4-phosphobutanoate		C4 H9 O8 P
				4-phospho-hydroxy-L-threonine
				erythronate-4-phosphate
121	serotonin and melatonin biosynthesis	14	1	5-hydroxy-L-tryptophan	1	C11 H12 N2 O3
122	abscisic acid biosynthesis	13	2	<i>trans</i>-neoxanthin	0
				C25-allenic-apo-aldehyde
123	phaseic acid biosynthesis	9	3	8'-hydroxyabscisate	1	C15 H20 O5
				phaseic acid
				dihydroxyphaseic acid
124	abscisic acid glucose ester biosynthesis	4	1	abscisic acid glucose ester	1	C21 H30 O9
125	IAA conjugate biosynthesis I	12	1	indole-3-yl-acetyl-<i>myo</i>-inositol L-arabinoside	1	C21 H27 N O11
126	IAA biosynthesis III	11	2	indole-3-acetyl-&beta;-4-D-glucose	0
				indole-3-acetyl-&beta;-6-D-glucose
127	IAA biosynthesis I	25	1	<i>N</i>-hydroxyl-tryptamine	0
128	indole-3-acetyl-amino acid biosynthesis	19	1	indole-3-acetyl-glutamine	1	C15 H17 N3 O4
129	methyl indole-3-acetate interconversion	7	1	methyl indole-3-acetate	0
130	brassinosteroid biosynthesis II	15	2	(22&alpha;)-hydroxy-campesterol	0
				(22&alpha;)-hydroxy-campest-4-en-3-one
131	brassinosteroid biosynthesis I	24	8	(6&alpha;)-hydroxycampestanol	4	C28 H46 O4
				6-oxocampestanol		C28 H48 O4
				cathasterone		C28 H50 O4
				teasterone		C28 H50 O5
				3-dehydroteasterone
				typhasterol
				6-deoxocastasterone
				6&alpha;-hydroxy-castasterone
132	<i>trans</i>-zeatin biosynthesis	18	3	<i>trans</i>-zeatin riboside triphosphate	2	C15 H23 N5 O11 P2
				<i>trans</i>-zeatin riboside diphosphate		C15 H24 N5 O14 P3
				<i>trans</i>-zeatin riboside monophosphate
133	<i>cis</i>-zeatin biosynthesis	6	1	<i>cis</i>-zeatin riboside monophosphate	0
134	cytokinins 7-<i>N</i>-glucoside biosynthesis	17	7	isopentenyladenine-7-<i>N</i>-glucoside	1	C22 H33 N5 O11
				benzyladenine-7-<i>N</i>-glucoside
				kinetin-7-<i>N</i>-glucoside
				<i>trans</i>-zeatin-7-<i>N</i>-glucoside
				dihydrozeatin-7-<i>N</i>-glucose
				<i>cis</i>-zeatin-7-<i>N</i>-glucoside
				<i>trans</i>-zeatin-<i>O</i>-glucoside-7-<i>N</i>-glucoside
135	cytokinins 9-<i>N</i>-glucoside biosynthesis	15	5	isopentenyladenine-9-<i>N</i>-glucoside	0
				benzyladenine-9-<i>N</i>-glucoside
				kinetin-9-<i>N</i>-glucoside
				<i>trans</i>-zeatin-9-<i>N</i>-glucoside
				<i>cis</i>-zeatin-9-<i>N</i>-glucoside
136	cytokinins-<i>O</i>-glucoside biosynthesis	11	3	dihydrozeatin-<i>O</i>-glucoside	1	C22 H35 N5 O11
				<i>cis</i>-zeatin-<i>O</i>-glucoside
				dihydrozeatin-9-<i>N</i>-glucoside-<i>O</i>-glucoside
137	lupinate biosynthesis	5	1	lupinate	1	C13 H18 N6 O3
138	gibberellin biosynthesis III (early C-13 hydroxylation)	15	3	gibberellin A44 diacid	0
				GA<sub>19</sub>
				GA<sub>38</sub>
139	gibberellin biosynthesis II (early C-3 hydroxylation)	12	1	GA<sub>37</sub>	0
140	gibberellin biosynthesis IV (<i>Gibberella fujikuroi</i>)	22	4	GA<sub>14</sub>-aldehyde	1	C19 H22 O4
				GA<sub>7</sub>
				GA<sub>120</sub>
				GA<sub>40</sub>
141	gibberellin biosynthesis I (non C-3, non C-13 hydroxylation)	14	1	GA<sub>24</sub>	0
142	tuberonate glucoside biosynthesis	4	1	tuberonic acid glucoside	1	C18 H28 O9
143	jasmonic acid biosynthesis	33	15	OPC8-CoA	13	C33 H52 N7 O18 P3 S
				OPC8-trans-2-enoyl-CoA		C35 H54 N7 O18 P3 S
				OPC8-3-hydroxyacyl-CoA		C35 H54 N7 O19 P3 S
				OPC8-3-ketoacyl-CoA		C35 H56 N7 O18 P3 S
				OPC6-CoA		C35 H56 N7 O19 P3 S
				OPC6-trans-2-enoyl-CoA		C37 H58 N7 O18 P3 S
				OPC6-3-hydroxyacyl-CoA		C37 H58 N7 O19 P3 S
				OPC6-3-ketoacyl-CoA		C37 H60 N7 O18 P3 S
				OPC4-CoA		C37 H60 N7 O19 P3 S
				OPC4-trans-2-enoyl-CoA		C39 H62 N7 O18 P3 S
				OPC4-3-hydroxyacyl-CoA		C39 H62 N7 O19 P3 S
				OPC4-3-ketoacyl-CoA		C39 H64 N7 O18 P3 S
				jasmonoyl-CoA		C39 H64 N7 O19 P3 S
				12,13(S)-epoxylinolenate
				12-oxo-cis-10,15-phytodienoate
144	KDO<sub>2</sub>-lipid A biosynthesis I	3	1	KDO<SUB>2</SUB>-(lauroyl)-lipid IV<SUB>A</SUB>	1	C96 H176 N2 O38 P2
145	Lipid A-core biosynthesis	18	9	heptosyl-KDO<SUB>2</SUB>-lipid A	9	C117 H216 N2 O45 P2
				heptosyl<sub>2</sub>-KDO<sub>2</sub>-lipid A		C124 H228 N2 O51 P2
				glucosyl-heptosyl<sub>2</sub>-KDO<sub>2</sub>-lipid A		C130 H238 N2 O56 P2
				glucosyl-heptosyl<sub>2</sub>-KDO<sub>2</sub>-lipid A-phosphate		C130 H239 N2 O59 P3
				glucosyl-heptosyl<sub>3</sub>-KDO<sub>2</sub>-lipid A-phosphate		C137 H251 N2 O65 P3
				glucosyl-heptosyl<sub>3</sub>-KDO<sub>2</sub>-lipid A-bisphosphate		C137 H252 N2 O68 P4
				galactosyl-glucosyl-heptosyl<sub>3</sub>-KDO<sub>2</sub>-lipid A-bisphosphate		C143 H262 N2 O73 P4
				galactosyl-glucosyl<sub>2</sub>-heptosyl<sub>3</sub>-KDO<sub>2</sub>-lipid A-bisphosphate		C149 H272 N2 O78 P4
				galactosyl-glucosyl<sub>3</sub>-heptosyl<sub>3</sub>-KDO<sub>2</sub>-lipid A-bisphosphate		C155 H282 N2 O83 P4
146	wax esters biosynthesis II	2	1	1-dodecanol	1	C12 H26 O
147	dolichol and dolichyl phosphate biosynthesis	13	2	polyprenyl diphosphate (C<sub>80</sub>)	2	C80 H130 O
				polyprenol (C<sub>80</sub>)		C80 H132 O7 P2
148	stigma estolide biosynthesis	10	1	estolide	1	C53 H100 O5
149	glycolipid desaturation	26	25	1-18:1-2-16:0-monogalactosyldiacylglycerol	15	C43 H70 O10
				1-18:1-2-16:1-monogalactosyldiacylglycerol		C43 H72 O10
				1-18:2-2-16:2-monogalactosyldiacylglycerol		C43 H74 O10
				1-18:3-2-16:3-monogalactosyldiacylglycerol		C43 H76 O10
				1-18:2-2-16:0-monogalactosyldiacylglycerol		C43 H78 O10
				1-18:3-2-16:0-monogalactosyldiacylglycerol		C43 H80 O10
				1-18:2-2-16:1-monogalactosyldiacylglycerol		C45 H74 O11
				1-18:3-2-16:1-monogalactosyldiacylglycerol		C45 H76 O11
				1-18:1-2-16:2-monogalactosyldiacylglycerol		C45 H78 O11
				1-18:3-2-16:2-monogalactosyldiacylglycerol		C49 H86 O15
				1-18:1-2-16:3-monogalactosyldiacylglycerol		C49 H88 O15
				1-18:2-2-16:3-monogalactosyldiacylglycerol		C49 H90 O15
				1-18:3-2-18:3-digalactosyldiacylglycerol		C51 H84 O15
				1-18:2-2-18:2-digalactosyldiacylglycerol		C51 H86 O15
				1-18:2-2-18:3-digalactosyldiacylglycerol		C51 H88 O15
				1-18:3-2-18:2-digalactosyldiacylglycerol
				1-18:1-2-16:0-digalactosyldiacylglycerol
				1-18:2-2-16:0-digalactosyldiacylglycerol
				1-18:3-2-16:0-digalactosyldiacylglycerol
				1-16:0-2-18:2-digalactosyldiacylglycerol
				1-16:0-2-18:3-digalactosyldiacylglycerol
				1-18:2-2-18:2-monogalactosyldiacylglycerol
				1-18:2-2-18:3-monogalactosyldiacylglycerol
				1-18:3-2-18:2-monogalactosyldiacylglycerol
				1-18:3-2-18:3-monogalactosyldiacylglycerol
150	sulfolipid biosynthesis	6	1	UDP-sulfoquinovose	1	C15 H24 N2 O19 P2 S
151	sophorosyloxydocosanoate biosynthesis	10	2	13-hydroxydocosanoate	2	C22 H44 O3
				13-&beta;-D-glucosyloxydocosanoate		C28 H54 O8
152	sphingolipid metabolism	23	4	inositol-P-ceramide	4	C18 H40 N O6 P
				mannosyl-diinositol-phosphorylceramide		C50 H100 N O13 P
				mannosyl-inositol-phosphorylceramide		C56 H110 N O18 P
				phytosphingosine-1-P		C62 H121 N O26 P2
153	choline biosynthesis II	7	2	N-monomethylethanolamine	1	C4 H11 N O
				N-dimethylethanolamine
154	<i>cis</i>-vaccenate biosynthesis	6	1	<i>cis</i>-vaccenate	0
155	&omega;-hydroxylation of caprate and laurate	12	2	decanoyl-CoA	1	C31 H54 N7 O17 P3 S
				caprate
156	&omega;- hydroxylation of laurate	9	1	&omega;-1 laurate	0
157	mycolate biosynthesis	48	32	&alpha;, &alpha;'-trehalose 6,6'-bismycolate	22	C126 H235 O12 P
				6-O-cis-methoxy-mycolyl-&beta;-D-mannopyranosyl-1-phosphoheptaprenol		C127 H235 O12 P
				6-O-trans-methoxy-mycolyl-&beta;-D-mannopyranosyl-1-phosphoheptaprenol		C127 H237 O12 P
				6-O-cis-keto-mycolyl-&beta;-D-mannopyranosyl-1-phosphoheptaprenol		C128 H237 O12 P
				6-O-trans-keto-mycolyl-&beta;-D-mannopyranosyl-1-phosphoheptaprenol		C182 H354 O17
				&alpha;-meroacyl-AMP		C184 H354 O17
				trehalose-cis-methoxy-mono-mycolate		C184 H358 O17
				trehalose-trans-methoxy-mono-mycolate		C186 H358 O17
				trehalose-cis-keto-mono-mycolate		C41 H69 O9 P
				trehalose-trans-keto-mono-mycolate		C44 H83 O16 P
				arabinogalactan-cis-methoxy-mycolate		C47 H86 N7 O17 P3 S
				arabinogalactan-trans-methoxy-mycolate		C48 H86 N7 O19 P3 S
				arabinogalactan-cis-keto-mycolate		C73 H129 O11 P
				arabinogalactan-trans-keto-mycolate		C76 H142 O15
				cis-methoxy-meroacyl-AMP		C97 H188 O14
				trans-methoxy-meroacyl-AMP		C97 H189 O17 P
				cerotoyl-CoA		C98 H188 O14
				2-carboxyl-cerotoyl-CoA		C98 H189 O17 P
				cis-keto-meroacyl-AMP		C98 H190 O14
				trans-keto-meroacyl-AMP		C98 H191 O17 P
				arachidoyl-CoA		C99 H190 O14
				D-mannopyranosyl-1-phosphoheptaprenol		C99 H191 O17 P
				6-O-mycolyl-trehalose-6-phosphate
				6-O-cis-methoxy-mycolyl-trehalose-6-phosphate
				6-O-trans-methoxy-mycolyl-trehalose-6-phosphate
				6-O-cis-keto-mycolyl-trehalose-6-phosphate
				6-O-trans-keto-mycolyl-trehalose-6-phosphate
				6-O-mycolyl-&beta;-D-mannopyranosyl-1-phosphoheptaprenol
				trehalose-cis-methoxy-di-mycolate
				trehalose-trans-methoxy-di-mycolate
				trehalose-cis-keto-di-mycolate
				trehalose-trans-keto-di-mycolate
158	&gamma;-linolenate biosynthesis II (animals)	10	1	&gamma;-linolenoyl-CoA	0
159	hydroxylated fatty acid biosynthesis (plants)	11	4	lesquerolate	1	C22 H40 O3
				eicosenoate
				auricolate
				densipolate
160	stearate biosynthesis I (animals)	17	3	3-oxo-stearoyl-CoA	2	C39 H68 N7 O18 P3 S
				3-hydroxy-stearoyl-CoA		C39 H70 N7 O18 P3 S
				<i>trans</i>-2,3-stearoyl-CoA
161	arachidonate and eicosapentaenoate biosynthesis	9	3	stearidonate	1	C18 H28 O2
				di-homo-&gamma;-linolenate
				eicosatetraenoate
162	&Delta;5-eicosenoate biosynthesis	2	1	&Delta;5-eicosenoyl-CoA	1	C41 H72 N7 O16 P3 S
163	petroselinate biosynthesis	6	1	petroselinate	0
164	crepenynic acid biosynthesis	4	1	crepenynate	0
165	vernolic acid biosynthesis	4	1	vernolate	0
166	dimorphecolate biosynthesis	4	2	<i>trans</i>-&Delta;12 linoleate	0
				dimorphecolate
167	calendate biosynthesis	3	1	calendate	0
168	punicic acid biosynthesis	3	1	punicate	0
169	&alpha;-eleostearic acid biosynthesis	3	1	&alpha;-eleostearate	0
170	cyclopropane and cyclopropene fatty acid biosynthesis	6	2	dihydrosterculate	2	C19 H34 O2
				sterculate		C19 H36 O2
171	CDP-archaeol biosynthesis	9	3	2,3-bis-<i>O</i>-(geranylgeranyl)glycerol 1-phosphate	3	C23 H41 O6 P
				CDP-archaeol		C43 H73 O6 P
				<i>sn</i>-3-<i>O</i>-(geranylgeranyl)glyceryl 1-phosphate		C52 H85 N3 O13 P2
172	phospholipid desaturation	19	18	1-18:3-2-18:3-phosphatidylcholine	12	C40 H71 O10 P
				1-18:1-2-18:1-sn-glycerol-3-phosphocholine		C40 H73 O10 P
				1-18:2-2-18:2-sn-glycerol-3-phosphocholine		C40 H75 O10 P
				1-18:1-2-16:0-phosphatidylglycerol		C40 H77 O10 P
				1-18:1-2-trans-16:1-phosphatidylglycerol		C42 H78 N O8 P
				1-18:2-2-trans-16:1-phosphatidylglycerol		C42 H80 N O8 P
				1-18:3-2-trans-16:1-phosphatidylglycerol		C42 H82 N O8 P
				1-18:2-2-16:0-phosphatidylglycerol		C44 H76 N O8 P
				1-18:3-2-16:0-phosphatidylglycerol		C44 H78 N O8 P
				1-18:2-2-18:1-phosphatidylcholine		C44 H80 N O8 P
				1-18:3-2-18:1-phosphatidylcholine		C44 H82 N O8 P
				1-18:3-2-18:2-phosphatidylcholine		C44 H84 N O8 P
				1-18:1-2-18:2-phosphatidylcholine
				1-18:1-2-18:3-phosphatidylcholine
				1-18:2-2-18:3-phosphatidylcholine
				1-16:0-2-18:1-phosphatidylcholine
				1-16:0-2-18:2-phosphatidylcholine
				1-16:0-2-18:3-phosphatidylcholine
173	phosphatidylcholine biosynthesis III	9	1	CDP-N-methylethanolamine	1	C12 H22 N4 O11 P2
174	phosphatidylcholine biosynthesis IV	10	1	CDP-N-dimethylethanolamine	1	C13 H24 N4 O11 P2
175	cardenolide biosynthesis	13	4	3-&beta;-hydroxy-5-&alpha;-pregnane-20-one	0
				4-methylpentanal
				5&alpha;-pregnan-3,20-dione
				pregnenolone
176	cardenolide glucosides biosynthesis	11	7	3-O-&beta;-D-glucoside digitoxigenin	3	C29 H44 O8
				digitoxigenin		C29 H44 O9
				digiproside		C35 H54 O13
				glucodigifucoside
				digitoxigenin 3-O-&beta;-D-quinovoside
				UDP-fucose
				D-fucose
177	bile acid biosynthesis, neutral pathway	44	20	(25<i>R</i>)-3&alpha;,7&alpha;,12&alpha;-trihydroxy-5&beta;-cholestan-26-al	6	C27 H46 O4
				(25<i>R</i>)-5&beta;-cholestane-3&alpha;,7&alpha;,12&alpha;,26-tetraol		C27 H46 O5
				7&alpha;,12&alpha;-dihydroxy-5&beta;-cholestan-3-one		C27 H48 O4
				(25<i>S</i>)-3&alpha;,7&alpha;,12&alpha;-trihydroxy-5&beta;-cholestanoyl-CoA		C48 H78 N7 O19 P3 S
				7&alpha;-hydroxy-5&beta;-cholestan-3-one		C48 H78 N7 O20 P3 S
				chenodeoxycholoyl-CoA		C48 H80 N7 O19 P3 S
				(25<i>R</i>)-5&beta;-cholestane-3&alpha;,7&alpha;,26-triol
				(25<i>R</i>)-3&alpha;,7&alpha;-dihydroxy-5&beta;-cholestan-26-al
				(25<i>S</i>)-3&alpha;,7&alpha;-dihydroxy-5&beta;-cholestanoyl-CoA
				(24<i>E</i>)-3&alpha;,7&alpha;-dihydroxy-5&beta;-cholest-24-enoyl-CoA
				(24<i>R</i>,25<i>R</i>)-3&alpha;,7&alpha;,24-trihydroxy-5&beta;-cholestanoyl CoA
				3&alpha;,7&alpha;-dihydroxy-24-oxo-5&beta;-cholestanoyl CoA
				7&alpha;-hydroxycholest-4-en-3-one
				(25<i>R</i>)-3&alpha;,7&alpha;-dihydroxy-5-&beta;-cholestanate
				(25<i>R</i>)-3&alpha;,7&alpha;,12&alpha;-trihydroxy-5&beta;-cholestan-26-oate
				7&alpha;-hydroxycholesterol
				taurocholate
				(25<i>R</i>)-3&alpha;,7&alpha;-dihydroxy-5&beta;-cholestanoyl-CoA
				7&alpha;,12&alpha;-dihydroxycholest-4-en-3-one
				(24<i>E</i>)-3&alpha;,7&alpha;,12&alpha;-trihydroxy-5&beta;-cholest-24-enoyl-CoA
178	zymosterol biosynthesis	20	10	4-&alpha;-methylzymosterol	4	C28 H44 O2
				4&alpha;-hydroxymethyl-4&beta;-methyl-5&alpha;-cholesta-8,24-dien-3&beta;-ol		C28 H44 O3
				4&alpha;-formyl-4&beta;-methyl-5&alpha;-cholesta-8,24-dien-3&beta;-ol		C29 H46 O2
				4&alpha;-carboxy-4&beta;-methyl-5&alpha;-cholesta-8,24-dien-3&beta;-ol		C29 H46 O3
				3-keto-4-methylzymosterol
				4&alpha;-hydroxymethyl-5&alpha;-cholesta-8,24-dien-3&beta;-ol
				4&alpha;-formyl-5&alpha;-cholesta-8,24-dien-3&beta;-ol
				5&alpha;-cholesta-8,24-dien-3-one
				4&alpha;-carboxy-5&alpha;-cholesta-8,24-dien-3&beta;-ol
				zymosterol
179	sitosterol biosynthesis	7	4	26,27-dehydrozymosterol	0
				24-alkyl sterol 1
				24-alkyl sterol 2
				24-alkyl sterol 3
180	ppGpp biosynthesis	10	2	pppGpp	2	C10 H17 N5 O17 P4
				ppGpp		C10 H18 N5 O20 P5
181	L-carnitine biosynthesis	14	3	3-hydroxy-<i>N</i><sup>6</sup>,<i>N</i><sup>6</sup>,<i>N</i><sup>6</sup>-trimethyl-L-lysine	1	C9 H20 N2 O3
				4-trimethylammoniobutanal
				<i>N</i><sup>6</sup>,<i>N</i><sup>6</sup>,<i>N</i><sup>6</sup>-trimethyl-L-lysine
182	Rapoport-Luebering glycolytic shunt	6	1	2,3-diphosphoglycerate	0
183	inosine-5'-phosphate biosynthesis I	16	1	<i>N<sup>5</sup></i>-carboxyaminoimidazole ribonucleotide	0
184	uridine-5'-phosphate biosynthesis	17	1	orotidine-5'-phosphate	1	C10 H13 N2 O11 P
185	pyrimidine deoxyribonucleotides <i>de novo</i> biosynthesis	20	2	dUDP	2	C9 H14 N2 O11 P2
				dUTP		C9 H15 N2 O14 P3
186	glucosylglycerate biosynthesis	7	2	glucosyl-3-phsophoglycerate	0
				glucosylglycerate
187	eumelanin biosynthesis	10	4	5,6-dihydroxyindole-2-carboxylate	1	C9 H5 N O4
				indole-5,6-quinone
				indole-5,6-quinone-2-carboxylate
				eumelanin
188	autoinducer AI-2 biosynthesis I	9	2	(2R,4S)-2-methyl-2,4-dihydroxydihydrofuran-3-one	0
				(2R,4S)-2-methyl-2,3,3,4-tetrahydroxytetrahydrofuran
189	autoinducer AI-2 biosynthesis II (<i>Vibrio</i>)	9	2	(2S,4S)-2-methyl-2,4-dihydroxydihydrofuran-3-one	0
				(2S,4S)-2-methyl-2,3,3,4-tetrahydroxytetrahydrofuran
190	dimethylsulfoniopropionate biosynthesis III (algae)	8	2	2-hydroxy-4-methylthiobutanoate	2	C5 H10 O3 S
				dimethylsulfonio-2-hydroxybutyrate		C6 H12 O3 S
191	dimethylsulfoniopropionate biosynthesis II (Spartina)	15	1	DMSP-amine	1	C5 H13 N S
192	ectoine biosynthesis	16	2	ectoine	1	C6 H10 N2 O2
				<i>N</i>-acetyl-L-2,4-diaminobutanoate
193	serinol biosynthesis	6	2	serinol phosphate	2	C3 H10 N O5 P
				serinol		C3 H9 N O2
194	aminopropylcadaverine biosynthesis	7	1	aminopropylcadaverine	0
195	&beta;-alanine betaine biosynthesis	7	3	N-methyl-&beta;-alanine	0
				N,N-dimethyl-&beta;-alanine
				&beta;-alanine betaine
196	glycine betaine biosynthesis III (plants)	9	1	betaine aldehyde hydrate	1	C5 H13 N O2
197	DIBOA / DIMBOA biosynthesis	17	2	indolin-2-one	0
				HBOA
198	benzoxazinoid glucosides biosynthesis	15	2	HMDBOA-Glc	2	C14 H17 N O9
				DIBOA-Glc		C16 H21 N O10
199	hypoglycin biosynthesis	23	11	hypoglycin A	4	C12 H18 N2 O5
				hypoglycin B		C5 H10 N2 O3 S
				5-hydroxy-2-oxopentanoate		C7 H11 N O2
				2-oxopenta-3,4-dienoate		C8 H10 O5
				2-oxohexa-4,5-cyclopropyl-5-enoate
				3-hydroxy-3-carboxy-4,5-cyclopropylhex-5-enoate
				2-hydroxy-3-carboxy-4,5-cyclopropylhex-5-enoate
				2-oxo-3-carboxy-4,5-cyclopropylhex-5-enoate
				beta-methylenecyclopropyl pyruvate
				L-&alpha;-(methylenecyclopropyl)-glycine
				cysteinylglycine
200	staphyloxanthin biosynthesis	15	9	dehydrosqualene	8	C15 H30 O2
				4,4'-diapophytofluene		C30 H40 O2
				4,4'-diapo-&zeta;-carotene		C30 H42
				4,4'-diaponeurosporene		C30 H44
				4,4'-diaponeurosporenal		C30 H46
				4,4'-diaponeurosporenoate		C30 H48
				glucosyl-4,4'-diaponeurosporenoate		C36 H50 O7
				staphyloxanthin		C51 H78 O8
				12-methyltetradecanoate
201	tuberculosinol biosynthesis	5	2	tuberculosinol diphosphate	0
				tuberculosinol
202	(1'<i>S</i>,5'<i>S</i>)-averufin biosynthesis	14	5	norsolorinate	1	C20 H20 O8
				(1'<i>S</i>)-averantin
				(1'<i>S</i>,5'<i>S</i>)-hydroxyaverantin
				(1'<i>S</i>,5'<i>R</i>)-hydroxyaverantin
				5'-oxoaverantin
203	versicolorin B biosynthesis	14	6	hydroxyversicolorone	3	C18 H14 O8
				versicolorone		C20 H16 O8
				versiconal hemiacetal acetate		C20 H16 O9
				versiconal
				versiconol acetate
				versiconol
204	sterigmatocystin biosynthesis	9	2	6-demethylsterigmatocystin	2	C17 H10 O6
				versicolorin A		C18 H10 O7
205	aflatoxins B<sub>1</sub> and G<sub>1</sub> biosynthesis	13	3	aflatoxin G<SUB>1</SUB>	2	C17 H12 O7
				aflatoxin B<SUB>1</SUB>		C19 H14 O6
				8-<i>O</i>-methylsterigmatocystin
206	aflatoxins B<sub>2</sub> and G<sub>2</sub> biosynthesis	15	5	aflatoxin B<SUB>2</SUB>	2	C18 H14 O6
				aflatoxin G<SUB>2</SUB>		C19 H16 O6
				dihydrodemethylsterigmatocystin
				dihydrosterigmatocystin
				dihydro-O-methylsterigmatocystin
207	furaneol biosynthesis	24	13	furaneol (keto form)	3	C12 H18 O9
				homofuraneol		C8 H12 O3
				norfuraneol		C9 H14 O3
				4-hydroxy-5-methyl-2-methylene-3(2H)-furanone
				(2E)-2-ethylidene-4-hydroxy-5-methyl-3(2H)-furanone
				(2E)-4-hydroxy-5-methyl-2-propylidene-3(2H)-furanone
				(2E)-2-butylidene-4-hydroxy-5-methyl-3(2H)-furanone
				2-butyl-4-hydroxy-5-methyl-3(2H)-furanone
				4-hydroxy-5-methyl-2-propyl-3(2H)-furanone
				furaneol (enol form)
				methoxyfuraneol (keto form)
				methoxyfuraneol (enol form)
				furaneol glucopyranoside
208	3-amino-5-hydroxybenzoate biosynthesis	15	6	kanosamine-6-phosphate	1	C7 H14 N O9 P
				3-amino-3-deoxy-D-fructose 6-phosphate
				1-deoxy-1-imino-D-erythrose 4-phosphate
				3,4-dideoxy-4-amino-D-<i>arabino</i>-heptulosonate 7-phosphate
				5-deoxy-5-amino-3-dehydroquinate
				5-deoxy-5-amino-3-dehydroshikimate
209	indican biosynthesis	11	1	indican	0
210	indigo biosynthesis	8	1	indigo	1	C16 H10 N2 O2
211	isopenicillin N biosynthesis	11	1	<i>N</i>-[(5<i>S</i>)-5-amino-5-carboxypentanoyl]-L-cysteinyl-D-valine	1	C14 H25 N3 O6 S
212	penicillin K biosynthesis	7	1	penicillin K	1	C16 H26 N2 O4 S
213	deacetylcephalosporin C biosynthesis	9	2	deacetoxycephalosporin C	1	C14 H19 N3 O6 S
				penicillin N
214	cephamycin C biosynthesis	9	3	cephamycin C	3	C15 H20 N4 O8 S
				O-carbamoyl-deacetylcephalosporin C		C15 H20 N4 O9 S
				7-&alpha;-hydroxy-O-carbamoyl-deacetylcephalosporin C		C16 H22 N4 O9 S
215	clavulanate biosynthesis	22	8	amidinoproclavaminate	5	C8 H12 N2 O4
				clavaminate		C8 H14 N2 O4
				clavaldehyde		C8 H9 N O5
				clavulanate		C9 H16 N4 O3
				deoxyamidinoproclavaminate		C9 H16 N4 O4
				dihydroclavaminate
				L-N<SUP>2</SUP>-(2-carboxyethyl)arginine
				proclavaminate
216	(5<i>R</i>)-carbapenem biosynthesis	18	4	(2<i>S</i>,5<i>S</i>)-carboxymethylproline	0
				(3<i>S</i>,5<i>S</i>)-carbapenam
				(3<i>S</i>,5<i>R</i>)-carbapenam
				(5<i>R</i>)-carbapenem
217	fosfomycin biosynthesis	10	2	fosfomycin	2	C3 H7 O4 P
				(<i>S</i>)-2-hydroxypropylphosphonate		C3 H9 O4 P
218	phenazine-1-carboxylate biosynthesis	13	3	<i>trans</i>-2,3-dihydro-3-hydroxyanthranilate	0
				2,3-dihydro-3-oxo-anthranilate
				2,3-dihydro-3-hydroxy-anthranilate
219	2-hydroxyphenazine biosynthesis	7	2	2-hydroxyphenazine	2	C12 H8 N2 O
				2-hydroxyphenazine-1-carboxylate		C13 H8 N2 O3
220	validamycin A biosynthesis	15	8	2-<i>epi</i>-5-<i>epi</i>-valiolone	3	C14 H25 N O8
				5-<i>epi</i>-valiolone		C20 H35 N O13
				valienone		C7 H13 O8 P
				validone
				valienone-7-phosphate
				validone-7-phosphate
				validoxylamine A
				validamycin A
221	albaflavenone biosynthesis	11	4	epi-isozizaene	0
				(4<i>S</i>)-albaflavenol
				(4<i>R</i>)-albaflavenol
				albaflavenone
222	puromycin biosynthesis	22	9	3'-keto-3'-dehydroATP	8	C10 H14 N5 O13 P3
				3'-amino-3'-deoxyAMP		C10 H14 N6 O3
				<i>N</i>6,<i>N</i>6,<i>O</i>-tridemethylpuromycin		C10 H17 N6 O12 P3
				<i>N</i>-acetyl-<i>N</i>6,<i>N</i>6,<i>O</i>-tridemethylpuromycin		C19 H23 N7 O5
				<i>N</i>-acetyl-<i>N</i>6,<i>O</i>-didemethylpuromycin		C21 H25 N7 O6
				<i>N</i>-acetyl-<i>O</i>-demethylpuromycin		C22 H27 N7 O6
				<i>N</i>-acetylpuromycin		C23 H29 N7 O6
				3'-amino-3'-deoxyATP		C24 H31 N7 O6
				3'-amino-3'-deoxyadenosine
223	terpentecin biosynthesis	7	3	terpentedienyl diphosphate	0
				terpentetriene
				terpentecin
224	streptomycin biosynthesis	37	12	CDP-<i>N</i>-methyl-L-glucosamine	8	C14 H29 N6 O11 P
				1-amino-1-deoxy-<i>scyllo</i>-inositol		C16 H28 N4 O15 P2
				<i>N</i><sup>1</sup>-amidinostreptamine 6-phosphate		C7 H13 N3 O5
				1-amino-1-deoxy-<i>scyllo</i>-inositol 4-phosphate		C7 H15 N3 O5
				streptomycin 6-phosphate		C7 H16 N3 O8 P
				1-guanidino-1-deoxy-<i>scyllo</i>-inositol 4-phosphate		C7 H16 N4 O4
				1-guanidino-1-deoxy-<i>scyllo</i>-inositol		C7 H17 N4 O7 P
				D-1-guanidino-1-deoxy-3-dehydro-<i>scyllo</i>-inositol		C8 H19 N6 O7 P
				D-1-guanidino-3-amino-1,3-dideoxy-<i>scyllo</i>-inositol
				dTDP-L-dihydrostreptose
				O-1,4-&alpha;-L-dihydrostreptosyl-streptidine 6-phosphate
				streptidine 6-phosphate
225	rifamycin B biosynthesis	24	8	rifamycin SV	8	C34 H41 N O11
				27-<i>O</i>-demethyl-rifamycin SV		C34 H43 N O11
				27-<i>O</i>-demethyl-25-<i>O</i>-desacetyl-rifamycin SV		C35 H43 N O11
				27-<i>O</i>-demethyl-25-<i>O</i>-desacetyl-rifamycin S		C35 H45 N O10
				rifamycin W hemiacetal		C35 H45 N O11
				proansamycin X		C35 H47 N O10
				34&alpha;-deoxy-rifamycin W		C36 H45 N O12
				rifamycin W		C37 H47 N O12
226	gramicidin S biosynthesis	9	1	gramicidin S	1	C60 H92 N12 O10
227	phosphinothricin tripeptide biosynthesis	35	14	demethyl-phosphinothricin	9	C10 H15 N3 O12 P2
				phophinothricin tripeptide		C11 H22 N3 O6 P
				hydroxymethylphosphonate		C12 H22 N3 O7 P
				phosphonoformate		C13 H24 N3 O7 P
				phosphonoformaldehyde		C4 H10 N O4 P
				CMP-5'-phosphonoformate		C4 H7 O5 P
				2-phosphono-formylglycerate		C6 H12 N O5 P
				carboxyphosphinopyruvate		C H3 O4 P
				phosphinomethylmalate		C H5 O4 P
				deamino &alpha;-keto demethylphosphinothricin
				phosphinomethylisomalate
				<i>N</i>-acetyl demethylphosphinothricin
				<i>N</i>-acetyl-demethylphophinothricin tripeptide
				<i>N</i>-acetyl-phophinothricin tripeptide
228	K-252 biosynthesis	19	5	K252a	4	C26 H19 N3 O5
				K252d		C26 H21 N3 O5
				K252b		C26 H23 N3 O5
				dTDP-2-deoxy-5-keto-dihydrostreptose		C27 H21 N3 O5
				2-deoxy-5-keto-dihydrostreptosyl-K252c
229	staurosporine biosynthesis	21	6	3'-<i>O</i>-demethyl-staurosporine	6	C16 H27 N3 O13 P2
				3'-<i>O</i>-demethyl-4'-<i>N</i>-demethyl-staurosporine		C26 H22 N4 O3
				holyrine A		C26 H24 N4 O3
				dTDP-L-ristosamine		C26 H24 N4 O4
				holyrine B		C27 H24 N4 O3
				staurosporine		C28 H26 N4 O3
230	3-methylarginine biosynthesis	6	2	3-methylarginine	2	C7 H13 N3 O3
				5-guanidino-3-methyl-2-oxo-pentanoate		C7 H16 N4 O2
231	actinorhodin biosynthesis	20	8	4-(3'-acetyl-5'-hydroxy-4'-oxo-1',4'-dihydronapthalen-2'-yl)-3-oxobutanoate	3	C16 H16 O6
				(S)-4-(3'-acetyl-5'-hydroxy-4'-oxo-1',4'-dihydronapthalen-2'-yl)-3-hydroxybutanoate		C32 H28 O12
				2-((1R,3S),-1',9'-dihydroxy-1'-methyl-10'-oxo-3',4',5',10'-tetrahydro-1H-benzo[g]isochromen-3'-yl)acetate		C32 H28 O14
				(S)-DNPA
				5-deoxy-dihydrokalafungin
				dihydrokalafungin
				actinorhodin intermediate
				actinorhodin
232	divinyl ether biosynthesis I (9-LOX)	8	2	colneleate	0
				colnelenate
233	9-LOX and 9-AOS pathway	9	3	9,10-EOD	0
				9,10-EOT
				&alpha;-ketol
234	9-LOX and 9-HPL pathway	8	2	(3Z)-nonenal	0
				(3Z,6Z)-nonadienal
235	divinyl ether biosynthesis II (13-LOX)	5	1	etheroleate	0
236	13-LOX and 13-HPL pathway	13	4	cis-3-hexenal	0
				cis-3-hexenol
				trans-2-hexenal
				trans-2-hexenol
237	hydroxycinnamic acid serotonin amides biosynthesis	16	4	caffeoylserotonin	2	C19 H18 N2 O2
				feruloylserotonin		C20 H20 N2 O4
				p-coumaroylserotonin
				cinnamoylserotonin
238	hydroxycinnamic acid tyramine amides biosynthesis	13	3	cinnamoyltyramine	2	C17 H17 N O2
				sinapoyltyramine		C19 H21 N O5
				p-coumaroyltyramine
239	spermidine hydroxycinnamic acid conjugates biosynthesis	13	5	trihydroxyferuloyl spermidine	5	C34 H37 N3 O6
				dihydroxyferuloyl-sinapoyl spermidine		C34 H37 N3 O9
				tricoumaroyl spermidine		C37 H43 N3 O12
				tricaffeoyl spermidine		C37 H43 N3 O9
				triferuloyl spermidine		C38 H45 N3 O12
240	hordatine biosynthesis	8	2	hordatine A	2	C14 H20 N4 O2
				4-coumaroylagmatine		C28 H38 N8 O4
241	N-methyl-&Delta;<sup>1</sup>-pyrrolinium cation biosynthesis	11	2	N-methylputrescine	0
				N-methylaminobutanal
242	steroidal glycoalkaloid biosynthesis	12	7	&alpha;-solanine	6	C27 H43 N O
				&beta;-solanine		C33 H53 N O6
				&gamma;-solanine		C39 H63 N O10
				&alpha;-chaconine		C39 H63 N O11
				&beta;-chaconine		C45 H73 N O14
				&gamma;-chaconine		C45 H73 N O15
				solanidine
243	capsaicin biosynthesis	15	1	capsaicin	1	C18 H27 N O3
244	&gamma;-coniciene and coniine biosynthesis	16	7	5-ketooctanal	4	C8 H15 N
				5-aminooctanal		C8 H17 N
				&gamma;-coniceine		C8 H17 N O
				coniine		C9 H19 N
				methylconiine
				conhydrinone
				conhydrine
245	ephedrine biosynthesis	19	5	1-phenylpropane-1,2-dione	1	C9 H11 N O
				cathinone
				norephedrine
				norpseudoephedrine
				pseudoephedrine
246	acridone alkaloid biosynthesis	17	3	1,3-dihydroxy-N-methylacridone	1	C29 H43 N8 O17 P3 S
				N-Methylanthranilate
				N-methylanthraniloyl-CoA
247	capsiconiate biosynthesis	12	1	capsiconiate	0
248	fumigaclavine C biosynthesis	7	3	fumigaclavine A	2	C18 H22 N2 O2
				fumigaclavine B		C23 H30 N2 O2
				fumigaclavine C
249	betalamic acid biosynthesis	10	1	4,5-seco-dopa	0
250	betacyanin biosynthesis	14	2	betanin	1	C24 H26 N2 O13
				gomphrenin I
251	amaranthin biosynthesis	13	6	cyclo-dopa glucuronylglucoside	5	C16 H20 O9
				amaranthin		C21 H27 N O15
				1-<i>O</i>-feruloyl-&beta;-D-glucose		C30 H34 N2 O19
				1-<i>O</i>-coumaroyl-&beta;-D-glucose		C39 H40 N2 O21
				celosianin I		C40 H42 N2 O22
				celosianin II
252	betaxanthin biosynthesis (via dopamine)	7	1	miraxanthin V	1	C17 H18 N2 O6
253	betaxanthin biosynthesis (via dopaxanthin)	12	3	portulacaxanthin II	2	C18 H18 N2 O7
				dopaxanthin		C18 H18 N2 O8
				dopaxanthin quinone
254	betaxanthin biosynthesis	10	1	betaxanthin	1	C18 H20 N2 O6
255	betacyanin biosynthesis (via dopamine)	8	2	2-descarboxy-cyclo-dopa	1	C17 H16 N2 O6
				2-descarboxy-betanidin
256	secologanin and strictosidine biosynthesis	26	7	7-deoxyloganin	2	C16 H24 O9
				10-hydroxygeraniol		C17 H26 O9
				10-oxogeraniol
				10-hydroxygeranial
				10-oxogeranial
				7-deoxyloganetate
				7-deoxyloganate
257	vindoline and vinblastine biosynthesis	21	8	16-hydroxytabersonine	6	C21 H24 N2 O2
				3-hydroxy-16-methoxy-2,3-dihydrotabersonine		C22 H26 N2 O3
				16-methoxytabersonine		C22 H28 N2 O4
				vinblastine		C23 H30 N2 O4
				catharanthine		C25 H32 N2 O6
				desacetoxyvindoline		C46 H58 N4 O9
				tabersonine
				vindoline
258	ajmaline and sarpagine biosynthesis	29	13	10-deoxysarpagine	5	C19 H22 N2 O2
				1,2-dihydrovomilenine		C21 H22 N2 O2
				16-epivellosimine		C21 H22 N2 O3
				4,21-dehydrogeissoschizine		C21 H24 N2 O4
				sarpagine		C27 H32 N2 O8
				acetylajmaline
				geissoschizine
				polyneuridine aldehyde
				raucaffricine
				strictosidine-aglycone
				vellosimine
				vinorine
				vomilenine
259	gramine biosynthesis	7	2	N-methyl-3-aminomethylindole	1	C11 H14 N2
				gramine
260	beta-carboline biosynthesis	8	4	harmalol	4	C12 H10 N2 O
				harmaline		C12 H12 N2 O
				harmine		C13 H12 N2 O
				harmol		C13 H14 N2 O
261	agroclavine biosynthesis	10	4	4-DMA L-abrine	2	C17 H24 N2 O2
				chanoclavine 1		C18 H22 N2
				agroclavine
				4-(3-methylbut-2-enyl)-L-tryptophan
262	ergotamine biosynthesis	11	4	elymoclavine	3	C16 H16 N2 O2
				paspalate		C16 H18 N2 O
				ergotamine		C33 H35 N5 O5
				lysergate
263	(S)-reticuline biosynthesis I	21	3	3'-hydroxy-N-methyl-(S)-coclaurine	0
				(S)-coclaurine
				(S)-norcoclaurine
264	berberine biosynthesis	13	1	S-canadine	0
265	morphine biosynthesis	25	11	1,2-dehydroreticulinium	2	C18 H19 N O3
				7-<i>O</i>-acetylsalutaridinol		C19 H21 N O3
				codeine
				codeinone
				thebaine
				neopinone
				oripavine
				morphine
				morphinone
				salutaridine
				salutaridinol
266	sanguinarine and macarpine biosynthesis	23	13	10-hydroxydihydrosanguinarine	11	C19 H19 N O4
				12-hydroxydihydrochelirubine		C20 H13 N O4
				6-hydroxyprotopine		C20 H15 N O4
				(S)-cis-N-methylstylopine		C20 H15 N O5
				macarpine		C20 H19 N O5
				chelirubine		C20 H19 N O6
				dihydrochelirubine		C21 H15 N O5
				dihydromacarpine		C21 H17 N O5
				dihydrosanguinarine		C21 H17 N O6
				protopine		C22 H17 N O6
				sanguinarine		C22 H19 N O6
				S-cheilanthifoline
				S-stylopine
267	palmatine biosynthesis	9	1	tetrahydropalmatine	1	C21 H25 N O4
268	laudanine biosynthesis	6	1	laudanine	1	C20 H25 N O4
269	bisbenzylisoquinoline alkaloid biosynthesis	9	3	berbamunine	1	C36 H40 N2 O6
				guattegaumerine
				R-N-methylcoclaurine
270	magnoflorine biosynthesis	10	2	(S)-corytuberine	0
				magnoflorine
271	(S)-reticuline biosynthesis II	16	1	S-norlaudanosoline	1	C16 H17 N O4
272	dehydroscoulerine biosynthesis	8	1	dehydroscoulerine	0
273	theobromine biosynthesis II (via xanthine)	6	1	3-methylxanthine	0
274	caffeine biosynthesis II (via paraxanthine)	9	1	paraxanthine	0
275	trigonelline biosynthesis	4	1	methylnicotinate	0
276	piperine biosynthesis	5	3	(E,E)-piperoyl-CoA	2	C33 H44 N7 O19 P3 S
				piperine		C5 H11 N
				piperidine
277	cinchona alkaloids biosynthesis	11	3	quinidine	1	C20 H22 N2 O2
				quinidinone
				corynantheal
278	camptothecin biosynthesis	13	2	strictosamide	2	C20 H16 N2 O4
				camptothecin		C26 H30 N2 O8
279	lupanine biosynthesis	13	3	lupanine	1	C15 H24 N2 O
				13&alpha;-tigloyloxylupanine
				17-oxosparteine
280	hyoscyamine and scopolamine biosynthesis	18	5	(6S)-hydroxyhyoscyamine	0
				littorine
				phenyllactatyl-CoA
				L-hyoscyamine
				scopolamine
281	calystegine biosynthesis	9	1	calystegine A3	0
282	cocaine biosynthesis	16	7	1-methylpyrrolidine-2-acetyl-CoA	3	C10 H17 N O4
				4-(1-methyl-2-pyrrolidinyl)-3-oxobutanoyl-CoA		C30 H49 N8 O18 P3 S
				4-(1-methyl-2-pyrrolidinyl)-3-oxobutanoate methyl ester		C9 H15 N O3
				4-(1-methyl-5-hydroxy-2-pyrrolidinyl)-3-oxobutanoate methyl ester
				2-carbomethoxy-3-tropinone
				acetonedicarboxylate
				4-(1-methyl-2-pyrrolidinyl)-3-oxobutanoate
283	colchicine biosynthesis	14	6	colchicine	4	C20 H23 N O5
				deacetylcolchicine		C21 H27 N O5
				demecolcine		C22 H25 N O6
				O-methylandrocymbine		C22 H27 N O5
				(S)-isoandrocymbine
				(S)-autumnaline
284	N-glucosylnicotinate metabolism	5	1	N-glucosylnicotinate	1	C12 H16 N O7
285	linamarin biosynthesis	16	4	(Z)-2-methylpropanal-oxime	2	C5 H11 N O3
				<i>N</i>-hydroxyvaline		C5 H11 N O4
				N,N-dihydroxyvaline
				2-methylpropionitrile
286	lotaustralin biosynthesis	16	5	N-hydroxyisoleucine	2	C6 H13 N O3
				N,N-dihydroxyisoleucine		C6 H13 N O4
				(E)-2-methylbutanal oxime
				(Z)-2-methylbutanal oxime
				2-methylbutyronitrile
287	dhurrin biosynthesis	14	3	(<i>Z</i>)-4-hydroxyphenylacetaldehyde oxime	1	C9 H11 N O5
				<i>N</i>-hydroxy-L-tyrosine
				<i>N</i>,<i>N</i>-dihydroxy-L-tyrosine
288	glucosinolate biosynthesis from homomethionine	29	9	3-benzoyloxypropyl-glucosinolate	9	C10 H19 N3 O4 S2
				3-hydroxypropyl-glucosinolate		C10 H19 N O10 S2
				3-methylsulfinylpropyl-glucosinolate		C11 H21 N O10 S3
				3-methylthiopropyl-desulfoglucosinolate		C11 H21 N O6 S2
				3-methylthiopropyl-glucosinolate		C11 H21 N O9 S3
				4-methylthiobutanonitrile oxide		C15 H26 N4 O7 S2
				4-methylthiobutylhydroximoyl-glutathione		C17 H23 N O11 S2
				4-methylthiobutylhydroximoyl-cysteinylglycine		C21 H29 N O14 S2
				3-sinapoyloxypropylglucosinolate		C5 H9 N O S
289	glucosinolate biosynthesis from phenylalanine	20	5	benzyl-desulfoglucosinolate	2	C13 H17 N3 O4 S
				benzyl-glucosinolate		C18 H24 N4 O7 S
				phenylacetonitrile oxide
				phenylacetohydroximoyl-glutathione
				phenylacetohydroximoyl-cysteinylglycine
290	glucosinolate biosynthesis from tryptophan	25	5	1-methoxy-3-indolylmethyl-glucosinolate	4	C10 H8 N2 O
				indole-3-acetonitrile oxide		C15 H18 N4 O4 S
				indole-3-acetohydroximoyl-glutathione		C16 H20 N2 O6 S
				indole-3-acetohydroximoyl-cysteinylglycine		C20 H25 N5 O7 S
				indolylmethyl-desulfoglucosinolate
291	aliphatic glucosinolate biosynthesis, side chain elongation cycle	21	10	2-(3'-methylthio)propylmalate	5	C10 H18 O5 S
				2-(4'-methylthio)butylmalate		C11 H20 O5 S
				2-(5'-methylthio)pentylmalate		C12 H22 O5 S
				2-(6'-methylthio)hexylmalate		C8 H14 O5 S
				2-(7'-methylthio)heptylmalate		C9 H16 O5 S
				3-(3'-methylthio)propylmalate
				3-(4'-methylthio)butylmalate
				3-(5'-methylthio)pentylmalate
				3-(6'-methylthio)hexylmalate
				3-(7'-methylthio)heptylmalate
292	glucosinolate biosynthesis from dihomomethionine	33	13	5-methylthiopentanonitrile oxide	13	C11 H19 N O10 S2
				5-methylthiopentylhydroximoyl-glutathione		C11 H21 N3 O4 S2
				5-methylthiopentylhydroximoyl-cysteinylglycine		C11 H21 N O10 S2
				4-benzoyloxybutylglucosinolate		C12 H23 N O10 S3
				2-benzoyloxy-3-butenylglucosinolate		C12 H23 N O6 S2
				4-sinapoyloxybutylglucosinolate		C12 H23 N O9 S3
				2-sinapoyloxy-3-butenylglucosinolate		C16 H28 N4 O7 S2
				4-hydroxybutylglucosinolate		C18 H23 N O11 S2
				4-methylsulfinylbutyl glucosinolate		C18 H25 N O11 S2
				4-methylthiobutyl glucosinolate		C22 H29 N O14 S2
				dihomomethionine		C22 H31 N O14 S2
				4-methylthiobutyldesulfoglucosinolate		C6 H11 N O S
				2-hydroxy-3-butenylglucosinolate		C7 H15 N O2 S
293	glucosinolate biosynthesis from trihomomethionine	23	8	6-methylthiohexanonitrile oxide	8	C12 H21 N O9 S2
				6-methylthiohexylhydroximoyl-glutathione		C12 H23 N3 O4 S2
				6-methylthiohexylhydroximoyl-cysteinylglycine		C13 H25 N O10 S3
				5-methylsulfinylpentyl glucosinolate		C13 H25 N O6 S2
				5-methylthiopentyldesulfoglucosinolate		C13 H25 N O9 S3
				5-methylthiopentylglucosinolate		C17 H30 N4 O7 S2
				trihomomethionine		C7 H13 N O S
				4-pentenylglucosinolate		C8 H17 N O2 S
294	glucosinolate biosynthesis from tetrahomomethionine	22	7	7-methylthioheptanonitrile oxide	7	C13 H25 N3 O4 S2
				7-methylthioheptylhydroximoyl-glutathione		C14 H27 N O10 S3
				7-methylthioheptylhydroximoyl-cysteinylglycine		C14 H27 N O6 S2
				6-methylsulfinylhexyl glucosinolate		C14 H27 N O9 S3
				tetrahomomethionine		C18 H32 N4 O7 S2
				6-methylthiohexyldesulfoglucosinolate		C8 H15 N O S
				6-methylthiohexylglucosinolate		C9 H19 N O2 S
295	glucosinolate biosynthesis from pentahomomethionine	22	7	8-methylthiooctanonitrile oxide	7	C10 H21 N O2 S
				8-methylthiooctylhydroximoyl-glutathione		C14 H27 N3 O4 S2
				8-methylthiooctylhydroximoyl-cysteinylglycine		C15 H29 N O10 S3
				pentahomomethionine		C15 H29 N O6 S2
				7-methylsulfinylheptyl glucosinolate		C15 H29 N O9 S3
				7-methylthioheptyl glucosinolate		C19 H34 N4 O7 S2
				7-methylthioheptyldesulfoglucosinolate		C9 H17 N O S
296	glucosinolate biosynthesis from hexahomomethionine	22	7	9-methylthiononanonitrile oxide	7	C10 H19 N O S
				9-methylthiononylhydroximoyl-glutathione		C11 H23 N O2 S
				9-methylthiononylhydroximoyl-cysteinylglycine		C15 H29 N3 O4 S2
				hexahomomethionine		C16 H31 N O10 S3
				8-methylsulfinyloctyl glucosinolate		C16 H31 N O6 S2
				8-methylthiooctyl glucosinolate		C16 H31 N O9 S3
				8-methylthiooctyldesulfoglucosinolate		C20 H36 N4 O7 S2
297	&beta;-pyrazole-1-ylalanine biosynthesis	8	2	2-pyrazoline	2	C3 H6 N2
				pyrazolidine		C3 H8 N2
298	mimosine biosynthesis	5	1	3,4-dihydroxypyridin	0
299	canavanine biosynthesis	13	2	canavaninosuccinate	2	C5 H11 N3 O4
				O-ureidohomoserine		C9 H16 N4 O7
300	willardiine and isowillardiine biosynthesis	6	2	willardiine	0
				isowillardiine
301	epoxypseudoisoeugenol-2-methylbutyrate biosynthesis	12	2	pseudoisoeugenol	0
				epoxypseudoisoeugenol-2-methylbutyrate
302	benzoate biosynthesis II (CoA-independent, non-&beta;-oxidative)	11	1	3-hydroxy-3-phenylpropionate	0
303	volatile benzenoid biosynthesis I (ester formation)	12	2	methylbenzoate	0
				benzylbenzoate
304	sinapate ester biosynthesis	12	4	1,2-di-O-sinapoyl-&beta;-D-glucose	2	C16 H23 N O5
				1-<i>O</i>-sinapoyl-&beta;-D-glucose		C17 H22 O10
				<i>O</i>-sinapoylcholine
				sinapoyl-(S)-malate
305	volatile cinnamoic ester biosynthesis	11	5	methylcinnamate	1	C11 H14 O2
				methyleugenol
				chavicol
				methylchavicol
				isomethyleugenol
306	curcumin glucoside biosynthesis	9	6	curcumin	4	C27 H33 O11
				curcumin monoglucoside		C33 H43 O16
				curcumin diglucoside		C39 H53 O21
				curcumin 4'-O-&beta;-D-gentiobioside		C45 H63 O26
				curcumin 4'-O-&beta;-D-gentiobiosyl 4''-O-&beta;-D-glucoside
				curcumin 4',4''-O-&beta;-D-digentiobioside
307	rosmarinic acid biosynthesis I	16	3	4-coumaroyl-4'-hydroxyphenyllactate	0
				4-coumaroyl-3',4'-dihydroxyphenyllactate
				caffeoyl-4'-hydroxyphenyllactate
308	rosmarinic acid biosynthesis II	15	1	R(+)-3,4-dihydroxyphenyllactate	0
309	eugenol and isoeugenol biosynthesis	9	1	coniferyl acetate	0
310	<i>t</i>-anethole biosynthesis	9	1	coumaryl acetate	1	C11 H12 O3
311	6-methoxymellein biosynthesis	13	2	6-hydroxymellein	0
				6-methoxymellein
312	coumarin biosynthesis (via 2-coumarate)	14	3	<i>trans</i>-&beta;-<i>D</i>-Glucosyl-2-hydroxycinnamate	0
				<i>cis</i>-coumarinic acid-&beta;-<i>D</i>-glucoside
				coumarinate
313	coumarin metabolism (to melilotic acid)	7	1	dihydrocoumarin	0
314	esculetin biosynthesis	9	4	3-(2-propenoic acid)-o-benzoquinone	0
				3-(2-propenoic acid)-4,6-hydroxy cyclohexa-2,5-dienone
				3,4,6-trihydroxy-cis-cinnamate
				<i>cis</i>-caffeate
315	linear furanocoumarin biosynthesis	16	5	bergapten	1	C11 H6 O4
				bergaptol
				(+)-marmesin
				demethylsuberosin
				psoralen
316	2,3-<i>trans</i>-flavanols biosynthesis	10	2	gallocatechin	0
				afzelechin
317	chrysoeriol biosynthesis	5	1	chrysoeriol	0
318	pelargonidin conjugates biosynthesis	15	4	pelargonidin-3-<i>O</i>-rutinoside	4	C24 H23 O13
				pelargonidin-3-<i>O</i>-rutinoside-5-<i>O</i>-&beta;-D-glucoside		C27 H31 O14
				pelargonidin-3-<i>O</i>-(6-<i>O</i>-malonyl-&beta;-D-glucoside)		C30 H27 O12
				pelargonidin 3-<i>O</i>-&beta;-D-p-coumaroylglucoside		C33 H41 O19
319	rose anthocyanin biosynthesis	6	1	cyanidin 5-<i>O</i>-&beta;-D-glucoside	0
320	salvianin biosynthesis	12	3	bisdemalonylsalvianin	1	C42 H41 O24
				monodemalonylsalvianin
				salvianin
321	shisonin biosynthesis	11	3	malonylshisonin	1	C30 H26 O13
				shisonin
				cyanidin 3-(p-coumaroyl)-glucoside
322	anthocyanidin sophoroside metabolism	9	3	cyanidin 3-<i>O</i>-sophoroside	0
				pelargonidin 3-<i>O</i>-sophoroside
				delphinidin 3-<i>O</i>-sophoroside
323	ternatin C5 biosynthesis	9	3	delphinidin 3-<i>O</i>-(6''-<i>O</i>-malonyl)-&beta;-glucoside	3	C24 H22 O15
				ternatin C5		C30 H33 O20
				delphinidin-3-<i>O</i>-(6''-<i>O</i>-malonyl)-&beta;-glucoside-3'-<i>O</i>-&beta;-glucoside		C36 H42 O25
324	gentiodelphin biosynthesis	11	5	delphinidin-3,5-diglucoside	4	C33 H40 O22
				delphinidin 3-<i>O</i>-glucosyl-5-<i>O</i>-caffeoylglucoside		C36 H36 O20
				delphinidin 3-<i>O</i>-glucosyl-5-<i>O</i>-caffeoylglucoside-3'-<i>O</i>-glucoside		C42 H46 O25
				gentiodelphin		C51 H52 O28
				delphinidin 3,5,3'-triglucoside
325	aurone biosynthesis	16	9	aureusidin	1	C21 H22 O11
				bracteatin
				2'4'6'34-pentahydroxychalcone
				sulfuretin
				sulfuretin 6-glucoside
				tetrahydroxychalcone 4'-<i>O</i>-glucoside
				pentahydroxychalcone 4'-<i>O</i>-glucoside
				aureusidin 6-<i>O</i>-glucoside
				bracteatin 6-<i>O</i>-glucoside
326	hispidol biosynthesis	9	5	phenoxy radical VI	0
				phenoxy radical VIII
				phenoxy radical VII
				hispidol
				quinol vinyl ether
327	6'-deoxychalcone metabolism	11	2	butein 4'-glucoside	0
				isoliquiritigenin 4'-glucoside
328	chalcone 2'-<i>O</i>-glucoside biosynthesis	5	1	chalcone 2'-<i>O</i>-glucoside	0
329	echinatin biosynthesis	10	3	echinatin	0
				2'-O-methyllicodione
				licodione
330	naringenin glycoside biosynthesis	8	3	narirutin	1	C27 H32 O14
				prunin
				naringin
331	hesperitin glycoside biosynthesis	11	4	hesperitin	2	C22 H24 O11
				hesperitin-7-O-&beta;-D-glucoside		C28 H34 O15
				neohesperidin
				hesperidin
332	sakuranetin biosynthesis	4	1	sakuranetin	0
333	ponciretin biosynthesis	5	1	ponciretin	0
334	acacetin biosynthesis	5	1	acacetin	0
335	apigenin glycosides biosynthesis	12	4	7-<i>O</i>-(&beta;-D-apiofuranosyl-(1-2)-&beta;-D-glucosyl)-apigenin	0
				7-<i>O</i>-&beta;-D-glucosyl-apigenin
				apigenin 7-O-neohesperidoside
				apigenin 7-O(6-malonyl-&beta;-D-glucoside)
336	vitexin and detivatives biosynthesis	10	4	7-<i>O</i>-methylvitexin 2''-<i>O</i>-&beta;-L-rhamnoside	0
				vitexin
				vitexin 2''-O-&beta;-D-glucoside
				vitexin 2''-<i>O</i>-&beta;-L-rhamnoside
337	isovitexin and isovitexin glycosides biosynthesis	12	6	isovitexin 2''-O-rhamnoside	1	C33 H40 O19
				isovitexin 7-O-glucoside
				isovitexin-7-O-glucosyl-2''O-rhamnoside
				isovitexin-7-O-xyloside
				isovitexin
				isovitexin 2''-O-&beta;-D-glucoside
338	luteolin glycosides biosynthesis	11	5	luteolin 7-<i>O</i>-&beta;-D-diglucuronide	3	C21 H18 O12
				luteolin 7-<i>O</i>-glucoside		C27 H26 O18
				luteolin 7-O-&beta;-D-glucuronide		C33 H34 O24
				luteolin 7-<i>O</i>-[&beta;-D-glucuronosyl-(1,2)-&beta;-D-glucuronide]-4'-<i>O</i>-&beta;-D-glucuronide
				luteolin 7-<i>O</i>-neohesperidoside
339	pinobanksin biosynthesis	14	3	(2R,3R)-pinobanksin	0
				pinocembrin chalcone
				pinostrobin
340	kaempferol glucoside biosynthesis (Arabidopsis)	14	7	kaempferol-3-glucoside-7-rhamnoside	1	C33 H40 O20
				kaempferol-3-O-gentiobioside-7-O-rhamnoside
				kaempferol-3-rhamnoside
				kaempferol-3-rhamnoside-7-rhamnoside
				kaempferol 7-<i>O</i>-glucoside
				kaempferol 3-<i>O</i>-rhamnoside-7-<i>O</i>-glucoside
				kaempferol 3,7-<i>O</i>-diglucoside
341	quercetin glucoside biosynthesis (Arabidopsis)	12	7	quercetin-3-<i>O</i>-glucoside-7-<i>O</i>-rhamnoside	1	C27 H32 O15
				quercetin 7-O-glucoside
				quercetin 3,5-<i>O</i>-diglucoside
				quercetin 3-<i>O</i>-rhamnoside-7-<i>O</i>-glucoside
				quercetin 3-<i>O</i>-rhamnoside
				quercetin 3,7-<i>O</i>-diglucoside
				quercetin-3-rhamnoside-7-rhamnoside
342	kaempferol triglucoside biosynthesis	10	3	kaempferol 3-<i>O</i>-&beta;-<i>D</i>-glucosyl-(1->2)-glucoside	2	C33 H40 O21
				kaempferol 3-<i>O</i>-&beta;-<i>D</i>-glucosyl-(1->2)-glucosyl-(1->2)-&beta;-<i>D</i>-glucoside		C42 H46 O23
				kaempferol 3-<i>O</i>-[6-(4-coumaroyl)-&beta;-<i>D</i>-glucosyl-(1->2)-glucosyl-(1->2)-&beta;-<i>D</i>-glucoside
343	chrysin biosynthesis	7	1	chrysin	0
344	rutin biosynthesis	4	1	rutin	0
345	syringetin biosynthesis	15	1	laricitrin	0
346	2,3-<i>cis</i>-flavanols biosynthesis	10	3	epigallocatechin	0
				epiafzelechin
				epicatechin
347	methylquercetin biosynthesis	10	5	3-O-methylquercetin	1	C19 H18 O8
				3,7-di-O-methylquercetin
				3,7,4'-tri-O-methylquercetin
				3,7,3'-tri-methylquercetagetin
				3,6,7,3'-tetra-methylquercetagetin
348	quercetinsulphates biosynthesis	14	8	quercetin 3, 7, 4'-trisulphate	6	C15 H10 O10 S
				quercetin 3, 7, 3', 4'-tetrasulphate		C15 H10 O13 S2
				isorhamnetin 3-sulphate		C15 H10 O16 S3
				isorhamnetin 3, 4'-bisulphate		C15 H10 O19 S4
				quercetin 3-sulfate		C16 H12 O10 S
				quercetin 3,3',7-trissulfate		C16 H12 O13 S2
				quercetin-3,3'-bissulfate
				quercetin-3,4'-bissulfate
349	isoflavonoid biosynthesis I	13	2	isoformononetin	0
				2'-<i>O</i>-methylisoliquiritigenin
350	isoflavonoid biosynthesis II	18	4	2-hydroxyisoflavanone naringenin	0
				prunetin
				pratensein
				2,5,7-trihydroxy-4'-methoxyisoflavanone
351	pterocarpan biosynthesis	8	1	2,7-dihydroxy-4'-methoxyisoflavanone	0
352	daidzein conjugates interconversion	14	2	daidzin	2	C21 H20 O9
				malonyldaidzin		C24 H22 O12
353	genistein conjugates interconversion	14	2	genistin	0
				malonylgenistin
354	medicarpin biosynthesis	10	1	7,2'-dihydroxy-4'-methoxy-isoflavanol	0
355	maackiain biosynthesis	11	3	pseudobaptigenin	2	C16 H10 O5
				2'-hydroxypseudobaptigenin		C16 H10 O6
				(-)-sophorol
356	pisatin biosynthesis	10	1	(+)-pisatin	0
357	medicarpin conjugates interconversion	14	2	(-)-medicarpin-3-<i>O</i>-glucoside	2	C22 H24 O9
				(-)-medicarpin-3-<i>O</i>-glucoside-6''-malonate		C25 H26 O12
358	maackiain conjugates interconversion	14	2	(-)-maackiain-3-<i>O</i>-glucoside	0
				(-)-maackiain-3-<i>O</i>-glucoside-6''-malonate
359	glyceollin biosynthesis I	10	1	2'-hydroxydihydrodaidzein	0
360	glyceollin biosynthesis II	13	4	(6&alpha;<i>S</i>,11&alpha;<i>S</i>)-4-dimethylallyl-3,6&alpha;,9-trihydroxypterocarpan	0
				(6&alpha;<i>S</i>,11&alpha;<i>S</i>)-2-dimethylallyl-3,6&alpha;,9-trihydroxypterocarpan
				glyceollin II
				glyceollin III
361	formononetin conjugates interconversion	14	2	formononetin-7-<i>O</i>-glucoside-6''-malonate	2	C22 H22 O9
				ononin		C25 H24 O12
362	phaseollin biosynthesis	10	1	(-)-phaseollin	1	C20 H18 O4
363	wighteone and luteone biosynthesis	14	5	luteone	0
				phaseoluteone
				wighteone
				lupiwighteone
				isowighteone
364	kievitone biosynthesis	9	2	2,3-dehydrokievitone	0
				dalbergioidin
365	6,7,4'-trihydroxyisoflavone biosynthesis	9	3	6,7,4'-trihydroxyflavanone	0
				2,6,7,4'-tetrahydroxyisoflavanone
				6,7,4'-trihydroxyisoflavone
366	vestitol and sativan biosynthesis	8	2	(-)-vestitol	1	C17 H18 O4
				(-)-sativan
367	dalcochinin biosynthesis	4	2	dalcochinin-8'-O-&beta;-glucoside	1	C29 H34 O12
				dalcochinin
368	dalpatein and dalnigrein biosynthesis	9	3	dalpatein 7-O-&beta;-D-apiofuranosyl-(1->6)-&beta;-D-glucopyranoside	3	C18 H14 O7
				dalpatein		C19 H18 O7
				dalnigrein		C29 H34 O16
369	afrormosin conjugates interconversion	9	3	afrormosin-7-O-glucoside	2	C23 H24 O10
				afrormosin-7-O-glucoside-6''-O-malonate		C26 H26 O13
				afrormosin
370	coumestrol biosynthesis	9	2	coumestrol	2	C15 H11 O6
				3-(2,4-dihydroxyphenyl)-4,7-dihydroxycoumarin		C15 H8 O5
371	rotenoid biosynthesis I	6	3	4'-hydroxy-rot-2'-enonate	0
				5'-hydroxy-rot-2'-enonate
				amorphigenin
372	rotenoid biosynthesis II	6	3	deguelin	0
				tephrosin
				rotenolone
373	rot-2'-enonate biosynthesis	14	4	7-hydroxy-4'5'-dimethoxyisoflavone	0
				2',7-dihydroxy-4',5'-dimethoxyisoflavone
				7-hydroxy-2',4',5'-trimethoxyisoflavone
				9-demethylmunduserone
374	leucodelphinidin biosynthesis	14	1	3',4',5'-pentahydroxyflavanone	0
375	xanthohumol biosynthesis	15	2	xanthohumol	1	C21 H22 O5
				desmethylxanthohumol
376	matairesinol biosynthesis	16	7	(-)-pinoresinol	1	C20 H24 O6
				(+)-lariciresinol
				(-)-lariciresinol
				(-)-secoisolariciresinol
				(+)-secoisolariciresinol
				(-)-lactol
				(-)-matairesinol
377	sesamin biosynthesis	10	4	(+)-piperitol	0
				(+)-sesamin
				(+)-sesamolinol
				(+)-sesamolin
378	podophyllotoxin and 6-methoxypodophyllotoxin biosynthesis	12	5	deoxypodophyllotoxin	4	C22 H22 O7
				podophyllotoxin		C22 H22 O8
				&beta;-peltatin		C23 H24 O8
				&beta;-peltatin-A methylether		C23 H24 O9
				6-methoxypodophyllotoxin
379	coniferin metabolism	7	1	coniferin	1	C16 H22 O8
380	dihydroconiferyl aldehyde biosynthesis	6	1	dihydroconiferyl aldehyde	0
381	monolignol glucosides biosynthesis	11	4	syringin	4	C16 H20 O8
				sinapaldehyde glucoside		C16 H24 O8
				coniferaldehyde glucoside		C17 H22 O9
				dihydroconiferyl alcohol glucoside		C17 H24 O9
382	chrysophanol biosynthesis	6	1	chrysophanol	0
383	shikonin biosynthesis	13	5	geranyl-hydroxybenzoate	3	C16 H22 O2
				geranylhydroquinone		C16 H22 O3
				3''-hydroxy-geranylhydroquinone		C17 H22 O3
				deoxyshikonin
				shikonin
384	hypericin biosynthesis	9	4	emodin anthrone	3	C30 H16 O8
				emodin dianthrone		C30 H18 O8
				protohypericin		C30 H20 O8
				hypericin
385	juglone biosynthesis	5	1	1,4-naphthoquinone	1	C10 H6 O2
386	lawsone biosynthesis	2	1	lawsone	0
387	sorgoleone biosynthesis	14	8	cis-9-hexadecenoyl-CoA	3	C22 H32 O2
				9,12-cis-hexadecadienoyl-CoA		C37 H60 N7 O17 P3 S
				9,12,15-cis-hexadecatrienoyl-CoA		C37 H62 N7 O17 P3 S
				5-pentadecatrienyl resorcinol
				5-pentadecatrienyl resorcinol-3-methyl ether
				dihydrosorgoleone
				sorgoleone
				methoxydihydrosorgoleone
388	pinosylvin metabolism	11	4	pinosylvin	1	C30 H44 N7 O17 P3 S
				3-phenylpropionyl-CoA
				dihydropinosylvin
				pinosylvin monomethylether
389	resveratrol biosynthesis	10	3	p-coumaroyltriacetate	0
				bis-noryangonin
				resveratrol
390	pentagalloylglucose biosynthesis	10	4	1,2,3,6-tetrakis-O-galloyl-&beta;-D-glucose	3	C20 H20 O14
				1-O,6-O-digalloyl-&beta;-D-glucose		C27 H24 O18
				1,2,6-trikis-<i>O</i>-galloyl-&beta;-<i>D</i>-glucose		C34 H28 O22
				6-<i>O</i>-galloylglucose
391	cornusiin E biosynthesis	6	2	tellimagrandin II	2	C41 H30 O26
				cornusiin E		C82 H58 O51
392	gallotannin biosynthesis	9	6	4-<i>O</i>-digalloyl-1,2,3,6-tetra-<i>O</i>-&beta;-<i>D</i>-galloylglucose	2	C48 H36 O30
				2-<i>O</i>-digalloyl-1,3,4,6-tetra-<i>O</i>-&beta;-<i>D</i>-galloylglucose		C55 H40 O34
				3-<i>O</i>-digalloyl-1,2,4,6-tetra-<i>O</i>-&beta;-<i>D</i>-galloylglucose
				2,3-<i>O</i>-digalloyl-1,4,6-tri-<i>O</i>-&beta;-<i>D</i>-galloylglucose
				2,4-<i>O</i>-digalloyl-1,3,6-tri-<i>O</i>-&beta;-<i>D</i>-galloylglucose
				3-<i>O</i>-trigalloyl-1,2,4,6-tetra-<i>O</i>-&beta;-<i>D</i>-galloylglucose
393	4-hydroxycoumarin biosynthesis	9	3	4-hydroxycoumarin	0
				3-oxomelilotoyl-CoA
				cis-enol-3-oxomelilotoyl-CoA
394	capsidiol biosynthesis	10	4	capsidiol	0
				1-deoxy-capsidiol
				3-deoxy-capsidiol
				5-<i>epi</i>-aristolochene
395	sesquiterpenoid phytoalexins biosynthesis	13	8	vetispiradiene	3	C14 H22 O2
				solavetivone		C15 H24 O3
				15-hydroxysolavetivone		C15 H26 O3
				2-dehydrolubimin
				lubimin
				3-hydroxylubimin
				rishitin
				3-hydroxy-15-dihydrolubimin
396	diterpene phytoalexins precursors biosynthesis	9	6	<i>ent</i>-cassa-12,15-diene	0
				stemar-13-ene
				<i>ent</i>-sandaracopimaradiene
				(-)-9&beta;-pimara-7,15-diene
				9&alpha;-copalyl diphosphate
				stemod-13(17)-ene
397	pentaketide chromone biosynthesis	6	1	5,7-dihydroxy-2-methylchromone	0
398	raspberry ketone biosynthesis	10	2	4-hydroxybenzalacetone	0
				rasberry ketone
399	usnate biosynthesis	8	2	methylphoracetophenone	1	C18 H18 O8
				hydratedusnate
400	aloesone biosynthesis II	12	4	heptaketide pyrone	3	C14 H12 O6
				aloenin		C19 H22 O10
				aloesin		C19 H22 O9
				heptaketide pyrone intermediate
401	barbaloin biosynthesis	10	4	octoketide	1	C15 H12 O3
				octoketide 4b
				chrysophanol anthrone
				barbaloin
402	plumbagin biosynthesis	10	2	naphthylisoquinoline alkaloid precursor	0
				plumbagine
403	phenylphenalenone biosynthesis	14	6	p-coumaroyldiketide-CoA	4	C11 H10 O4
				lachnanthocarpone		C19 H12 O3
				(4E,6E)-1-(4-hydroxyphenyl)-7-phenylhepta-4,6-dien-3-one		C19 H18 O2
				(1E,6E)-1-(4-hydroxyphenyl)-7-phenylhepta-1,6-diene-3,5-dione		C20 H14 O2
				p-coumaroyldiketide
				methoxyanigorufone
404	B series fagopyritols biosynthesis	7	3	fagopyritol B1	0
				fagopyritol B2
				fagopyritol B3
405	A series fagopyritols biosynthesis	7	3	fagopyritol A2	0
				fagopyritol A1
				fagopyritol A3
406	kanosamine biosynthesis	11	2	UDP-3-keto-D-glucose	1	C15 H22 N2 O17 P2
				UDP-kanosamine
407	galactosylcyclitol biosynthesis	8	3	galactopinitol A	1	C19 H34 O16
				galactopinitol B
				ciceritol
408	D-<i>myo</i>-inositol (1,4,5)-trisphosphate degradation	5	2	1D-<i>myo</i>-inositol (4)-monophosphate	0
				D-<i>myo</i>-inositol (1,4)-bisphosphate
409	1D-<i>myo</i>-inositol hexakisphosphate biosynthesis IV (<i>Dictyostelium</i>)	10	1	D-<i>myo</i>-inositol (3,6)-bisphosphate	0
410	heliocides biosynthesis	15	10	heliocide H1	4	C15 H16 O5
				heliocide H2		C16 H18 O5
				heliocide H3		C25 H30 O5
				heliocide H4		C26 H32 O5
				heliocide B1
				heliocide B2
				heliocide B3
				heliocide B4
				hemigossypolone
				hemigossypolone-6-methyl ether
411	lacinilene C biosynthesis	5	2	2,7-dihydroxycadalene	1	C15 H18 O2
				lacinilene C
412	phytol salvage pathway	6	1	phytyl monophosphate	1	C20 H41 O4 P
413	taxol biosynthesis	22	9	10&beta;-hydroxytaxa-4(20),11-dien-5&alpha;-yl acetate	7	C22 H34 O2
				10-deacetylbaccatin III		C22 H34 O3
				baccatin III		C29 H36 O10
				taxol		C30 H45 N8 O18 P3 S
				3'-N-debenzoyltaxol		C31 H38 O11
				(RS)-&beta;-phenylalanoyl-CoA		C40 H47 N O13
				taxa-4,11-diene		C47 H51 N O14
				taxa-4(20),11-dien-5-&alpha;-yl acetate
				taxa-4(20),11-dien-5&alpha;-ol
414	casbene biosynthesis	3	1	casbene	0
415	phytyl diphosphate biosynthesis	7	2	dihydrogeranylgeranyl-PP	2	C20 H38 O7 P2
				tetrahydrogeranylgeranyl-PP		C20 H40 O7 P2
416	abietic acid biosynthesis	15	4	abietadienol	0
				abietadiene-diol
				abietadienal
				abietic acid
417	levopimaric acid biosynthesis	13	5	levopimaradiene	0
				levopimaradienol
				levopiramadiene-diol
				levopimaradienal
				levopimaric acid
418	neoabietic acid biosynthesis	13	5	neoabietadiene	0
				neoabietadienol
				neoabietadiene-diol
				neoabietadienal
				neoabietic acid
419	palustric acid biosynthesis	13	5	palustradiene	0
				palustradienol
				palustradiene-diol
				palustradienal
				palustric acid
420	dehydroabietic acid biosynthesis	14	5	dehydroabietadiene	1	C20 H30
				dehydroabietadienol
				dehydroabietadiene-diol
				dehydroabietadienal
				dehydroabietate
421	isopimaric acid biosynthesis	13	5	(+)-isopimara-7,15-diene	0
				isopimaradienol
				isopimaradiene-diol
				isopimaradienal
				isopimaric acid
422	monoterpene biosynthesis	13	4	(-)-&alpha;-terpineol	0
				terpinolene
				sabinene
				(<i>Z</i>)-&beta;-ocimene
423	menthol biosynthesis	21	7	(+)-neomenthol	0
				(+)-<i>cis</i>-isopulegone
				(+)-pulegone
				(+)-isomenthone
				(+)-isomenthol
				(+)-neoisomenthol
				(+)-menthofuran
424	oleoresin monoterpene volatiles biosynthesis	10	2	tricyclene	0
				(-)-camphene
425	bornyl diphosphate biosynthesis	2	1	(+)-bornyl-diphosphate	0
426	geraniol and geranial biosynthesis	9	1	neral	0
427	geranyl acetate biosynthesis	7	1	geranyl acetate	1	C12 H20 O2
428	perillyl alcohol biosynthesis	14	1	(-)-perillyl alcohol	0
429	fenchol biosynthesis I	13	2	&beta;-fenchene	1	C11 H18 O
				&beta;-fenchocamphorone
430	trichome monoterpenes biosynthesis	14	4	neryl diphosphate	2	C10 H17
				&alpha;-phellandrene		C10 H18
				neryl cation
				&alpha;-terpinyl cation
431	artemisinin biosynthesis	14	6	artemisinic alcohol	1	C15 H26 O4
				artemisinic aldehyde
				dihydroartemisinic aldehyde
				dihydroartemisinate
				dihydroartemisinic acid hydroperoxide
				artemisinin
432	oleoresin sesquiterpene volatiles biosynthesis	8	5	longifolene	0
				&gamma;-humulene
				(<i>E</i>)-&alpha;-bisabolene
				&delta;-selinene
				&alpha;-longipinene
433	DMNT biosynthesis	6	2	(<i>E</i>)-nerolidol	1	C11 H18
				DMNT
434	farnesene biosynthesis	5	3	(<i>E</i>)-&beta;-farnesene	0
				(<i>E</i>,<i>E</i>)-&alpha;-farnesene
				(Z,E)-&alpha;-farnesene
435	germacrene biosynthesis	7	4	(<i>E,E</i>)-germacrene B	0
				germacrene C
				(-)-germacrene D
				(+)-germacrene D
436	costunolide biosynthesis	10	4	costunolide	1	C15 H20 O2
				germacra-1(10),4,11(13)-trien-12-ol
				germacra-1(10),4,11(13)-trien-12-al
				germacrene acid
437	gossypol biosynthesis	18	5	8-hydroxy-(+)-&delta;-cadinene	4	C15 H16 O3
				desoxyhemigossypol		C16 H18 O3
				gossypol		C30 H30 O8
				gossypol-6,6'-dimethyl ether		C32 H34 O8
				desoxyhemigossypol-6-methyl ether
438	geosmin biosynthesis	7	2	(-)-geosmin	1	C12 H22 O
				(8S,9S,10S)-8,10-dimethyl-1-octalin
439	cis-calamenene related sesquiterpenoids biosynthesis	4	2	cis-muurola-3,5-diene	0
				cis-Muurola-4(14),5-diene
440	santalene biosynthesis	4	2	&alpha;-santalene	0
				&beta;-santalene
441	curcumene biosynthesis	6	3	&alpha;-curcumene	0
				&beta;-curcumene
				&gamma;-curcumene
442	patchoulol biosynthesis	7	4	patchoulol	0
				&alpha;-patchoulene
				&beta;-patchoulene
				&gamma;-patchoulene
443	zerumbone biosynthesis	8	2	zerumbone	0
				8-hydroxy-&alpha;-humulene
444	eudesmol biosynthesis	6	3	&alpha;-eudesmol	0
				&beta;-eudesmol
				&gamma;-eudesmol
445	&beta;-caryophyllene biosynthesis	5	1	&beta;-elemene	0
446	botrydial biosynthesis	6	2	presilphiperfolan-8&beta;-ol	1	C15 H26 O5
				botrydial
447	&beta;-cubebene biosynthesis	3	1	(-)-&beta;-cubebene	0
448	valencene and 7-epi-&alpha;-selinene biosynthesis	5	2	valencene	1	C15 H26
				7-<i>epi</i>-&alpha;-selinene
449	selinene biosynthesis	4	2	&beta;-selinene	0
				&alpha;-selinene
450	bixin biosynthesis	12	4	bixin aldehyde	4	C24 H28 O2
				norbixin		C24 H28 O4
				bixin		C25 H30 O4
				bixin dimethyl ester		C26 H32 O4
451	crocetin biosynthesis	10	3	crocetin dialdehyde	2	C16 H26 O7
				hydroxy-&beta;-cyclocitral		C20 H24 O2
				picrocrocin
452	crocetin esters biosynthesis	9	5	crocetin monoglucosyl ester	3	C32 H44 O14
				crocetin monogentiobiosyl ester		C38 H54 O19
				crocetin gentiobiosylglucosyl ester		C44 H64 O24
				crocin
				crocetin diglucosyl ester
453	capsanthin and capsorubin biosynthesis	7	2	capsanthin	0
				capsorubin
454	lactucaxanthin biosynthesis	6	3	&epsilon;-carotene	0
				&epsilon;,&epsilon;-carotene-3-diol
				lactucaxanthin
455	astaxanthin biosynthesis	11	5	3S,3'S-astaxanthin	4	C40 H52 O3
				adonirubin		C40 H52 O4
				echinenone		C40 H54 O
				adonixanthin		C40 H54 O3
				3-hydroxyechinenone
456	canthaxanthin biosynthesis	7	3	isozeaxanthin	0
				3,4,3',4'-tetradehydroisozeaxanthin
				3,4,3',4'-tetradehydro-&beta;,&beta;-carotene
457	&beta;-carotene biosynthesis	3	1	&gamma;-carotene	0
458	lutein biosynthesis	9	2	&alpha;-carotene	0
				zeinoxanthin
459	myxol-2' fucoside biosynthesis	8	5	1'-hydroxy-&gamma;-carotene	0
				1-hydroxylycopene
				plectaniaxanthin
				myxol
				myxol-2' fucoside
460	synechoxanthin biosynthesis	9	6	&beta;,&chi;-carotene	5	C40 H44 O4
				renierapurpurin		C40 H46 O2
				18-hydroxyrenierapurpurin		C40 H46 O3
				&chi;,&chi;-caroten-18-oate		C40 H48
				18'-hydroxy-&chi;,&chi;-caroten-18-oate		C40 H48 O
				synechoxanthin
461	spheroidene and spharoidenone biosynthesis	8	4	hydroxyneurosporene	2	C40 H60 O
				spheroidenone		C41 H60 O
				spheroidene
				methoxyneurosporene
462	neurosporene biosynthesis	9	3	15-<i>cis</i>-phytoene	1	C40 H62
				prephytoene diphosphate
				phytofluene
463	zeaxanthin-&beta;-D-diglucoside biosynthesis	6	2	zeaxanthin-&beta;-D-glucoside	1	C52 H76 O12
				zeaxanthin-&beta;-D-diglucoside
464	saponin biosynthesis I	13	3	olean-12-ene-3&beta;,24-diol	2	C30 H50 O2
				sophoradiol		C36 H60 O9
				soyasapogenol B-3-<i>O</i>-&beta;-glucuronide
465	ginsenoside biosynthesis	10	1	dammarenediol-II	0
466	saponin biosynthesis II	12	7	oleanolate	3	C42 H66 O14
				oleanolate 3 beta-D-glucuronoside		C48 H76 O19
				oleanolate 3-beta-D-glucuronoside-(3,1)-galactoside		C54 H86 O24
				oleanolate 3-beta-D-glucuronoside-28-glucoside
				oleanolate 3-beta-D-glucuronoside-(3,1)-galactoside-28-glucoside
				oleanolate-3-beta-D-glucuronoside-(3,1)-galactoside-(4,1)-glucoside-28-glucoside
				oleanolate-3-beta-D-glucuronoside-(3,1)-galactoside-(4,1)-glucoside
467	saponin biosynthesis III	8	6	gypsogenin	3	C30 H46 O5
				gypsogenin-28-beta-D-glucoside		C36 H56 O10
				gypsogenate		C36 H56 O11
				gypsogenate-28-beta-D-glucoside
				16-alpha-hydroxygypsogenate
				16-alpha-hydroxygypsogenate-28-beta-D-glucoside
468	saponin biosynthesis IV	6	3	hederagenin	1	C30 H48 O4
				soyasapogenol E
				medicagenate
469	thalianol and derivatives biosynthesis	2	1	thalianol	0
470	marneral biosynthesis	2	1	marneral	0
471	arabidiol biosynthesis	3	1	arabidiol	0
472	baruol biosynthesis	2	1	baruol	0
473	dammara-18(28),21-diene biosynthesis	2	1	dammara-18(28),21-diene	0
474	diploterol and cycloartenol biosynthesis	10	2	hop-22(29)-ene	0
				hopan-22-ol
475	C30 botryococcene biosynthesis	8	1	C30 botryococcene	0
476	mangrove triterpenoid biosynthesis	7	2	taraxerol	0
				germanicol
477	avenacin biosynthesis	4	1	avenacin	1	C55 H83 N O21
478	humulone biosynthesis	13	4	phlorisovalerophenone	0
				diprenylphlorisovalerophenone
				humulone
				4-prenylphlorisovalerophenone
479	cohumulone biosynthesis	13	1	cohumulone	0
480	cannabinoid biosynthesis	21	6	olivetolic acid	0
				cannabigerolic acid
				&Delta;<sup>9</sup>-tetrahydrocannabinolic acid
				&Delta;<sup>9</sup>tetrahydrocannabinol
				cannabidiol
				cannabichromene
481	hyperforin biosynthesis	12	1	hyperforin	1	C35 H52 O4
482	olivetol biosynthesis	9	3	olivetol	1	C11 H16 O2
				tetraketide pyrone
				triketide pyrone
483	tetrahydroxyxanthone biosynthesis (from benzoate)	17	3	2,4,6-trihydroxybenzophenone	0
				1,3,7-trihydroxyxanthone
				1,3,6,7-tetrahydroxyxanthone
484	tetrahydroxyxanthone biosynthesis (from 3-hydroxybenzoate)	17	4	3-hydroxybenzoyl-CoA	0
				1,3,5-trihydroxyxanthone
				1,3,5,8-tetrahydroxyxanthone
				1,3,5,6-tetrahydroxyxanthone
485	aerobactin biosynthesis	14	3	aerobactin	1	C22 H36 N4 O13
				<i>N<sup>6</sup></i>-Hydroxy-L-lysine
				<i>N<SUP>6</SUP></i>-acetyl-<i>N<SUP>6</SUP></i>-hydroxy-L-lysine
486	2'-deoxymugineic acid phytosiderophore biosynthesis	12	1	3''-deamino-3''-oxonicotianamine	1	C12 H18 N2 O7
487	hydroxylated mugineic acid phytosiderophore biosynthesis	9	3	mugineic acid	2	C12 H20 N2 O8
				3-epihydroxymugineate		C12 H20 N2 O9
				3-epihydroxy-2'-deoxymugineate
488	petrobactin biosynthesis	17	6	3,4-dihydroxybenzoate-adenylate	5	C13 H25 N3 O6
				<i>N</i><sup>1</sup>-(3,4-dihydroxybenzoyl)-<i>N</i><sup>8</sup>-citryl-spermidine		C20 H29 N3 O9
				<i>N</i>-citryl-spermidine		C20 H42 N6 O5
				<i>N</i><sup>8</sup>,<i>N</i>'<sup>8</sup>-citryl-bis(spermidine)		C27 H46 N6 O8
				<i>N</i><sup>1</sup>-(3,4-dihydroxybenzoyl)-<i>N</i><sup>8</sup>,<i>N</i>'<sup>8</sup>-citryl-bis(spermidine)		C34 H50 N6 O11
				petrobactin
489	desferrioxamine E biosynthesis	15	1	desferrioxamine E	1	C27 H48 N6 O9
490	desferrioxamine B biosynthesis	16	2	<i>N</i>-hydroxy-<i>N</i>-acetylcadaverine	1	C25 H48 N6 O8
				desferrioxamine B
491	putrebactin biosynthesis	13	2	pre-putrebactin	2	C16 H28 N4 O6
				putrebactin		C16 H30 N4 O7
492	alcaligin biosynthesis	16	3	alcaligin	2	C16 H28 N4 O8
				3-[4-amino-3-hydroxybutyl]-hydroxy-carbamoyl-propanoate		C16 H30 N4 O9
				pre-alcaligin
493	bisucaberin biosynthesis	15	2	bisucaberin	2	C18 H32 N4 O6
				pre-bisucaberin		C18 H34 N4 O7
494	yersiniabactin biosynthesis	15	1	yersiniabactin	1	C22 H29 N3 O3 S3
495	pyoverdine I biosynthesis	19	3	pyoverdine I	2	C56 H88 N18 O22
				<i>N</i><sup>5</sup>-formyl-<i>N</i><sup>5</sup>-hydroxy-L-ornithine		C56 H90 N18 O21
				ferribactin
496	rhizobactin 1021 biosynthesis	18	4	rhizobactin 1021	3	C16 H28 N4 O9
				N<SUP>4</SUP>-hydroxy-1-aminopropane		C22 H38 N4 O9
				N<SUP>4</SUP>-acetyl-N<SUP>4</SUP>-hydroxy-1-aminopropane		C3 H10 N2 O
				rhizobactin 1021 core
497	cyclohexanol degradation	13	2	&epsilon;-caprolactone	1	C6 H12 O3
				6-hydroxyhexanoate
498	ethylene glycol degradation	7	1	ethylene glycol	1	C2 H6 O2
499	glycerol degradation III	7	1	1,3-propanediol	0
500	methylglyoxal degradation VI	9	2	D-lactaldehyde	0
				D-1,2-propanediol
501	methylglyoxal degradation I	7	1	S-lactoyl-glutathione	1	C13 H21 N3 O8 S
502	stachydrine degradation	3	2	stachydrine	0
				monomethyl proline
503	isopropylamine degradation	15	4	&gamma;-glutamyl-isopropylamide	0
				&gamma;-glutamyl-L-alaninol
				L-alaninol
				L-2-aminopropionaldehyde
504	histamine degradation	17	3	imidazole acetaldehyde	1	C6 H11 N3
				N-&alpha;-&gamma;-L-glutamylhistamine
				<i>N</i><sup>&tau;</sup>-methylhistamine
505	dopamine degradation	17	1	dopamine 3-<i>O</i>-sulfate	1	C8 H11 N O5 S
506	carnitine degradation I	11	1	&gamma;-butyrobetainyl-CoA	1	C28 H49 N8 O17 P3 S
507	carnitine degradation II	10	2	3-dehydrocarnitine	1	C6 H13 N O
				trimethylaminoacetone
508	carnitine degradation III	6	1	D,L-malic semialdehyde	0
509	creatinine degradation II	14	2	<i>N</i>-carbamoylsarcosine	0
				<i>N</i>-methylhydantoin
510	creatinine degradation III	7	1	methylguanidine	1	C2 H7 N3
511	putrescine degradation II	13	3	4-(glutamylamino) butanoate	2	C9 H16 N2 O4
				&gamma;-glutamyl-&gamma;-aminobutyraldehyde		C9 H19 N3 O3
				&gamma;-glutamyl-L-putrescine
512	spermine and spermidine degradation II	12	3	1-(3-aminopropyl)-4-aminobutanal	2	C7 H14 N2
				1,5-diazabicyclononane		C7 H16 N2 O
				1-(3-aminopropyl)-pyrrolinium
513	L-dopa degradation	12	3	3-<i>O</i>-methyldopa	2	C10 H12 O5
				3-methoxy-4-hydroxyphenylpyruvate		C10 H13 N O4
				3-methoxy-4-hydroxyphenyllactate
514	ornithine degradation II (Stickland reaction)	19	2	(2<i>R</i>,4<i>S</i>)-2, 4-diaminopentanoate	0
				2-amino-4-oxopentanoate
515	4-hydroxyproline degradation I	13	3	D-4-hydroxy-2-keto-glutarate	1	C5 H6 O6
				L-erythro-4-hydroxy-glutamate
				pyrroline-hydroxy-carboxylate
516	4-hydroxyproline degradation II	11	2	<i>cis</i>-4-hydroxy-D-proline	0
				1-pyrroline-4-hydroxy-2-carboxylate
517	arginine degradation X (arginine monooxygenase pathway)	10	1	4-guanidinobutyramide	1	C5 H12 N4 O
518	arginine degradation II (AST pathway)	16	3	N<SUP>2</SUP>-succinyl-L-arginine	1	C9 H13 N O7
				N<sup>2</sup>-succinyl-L-glutamate 5-semialdehyde
				N<SUP>2</SUP>-succinylglutamate
519	asparagine degradation II	5	1	2-hydroxysuccinamate	0
520	L-cysteine degradation I	10	1	3-sulfinyl-pyruvate	1	C3 H4 O5 S
521	L-cysteine degradation III	8	1	3-mercaptopyruvate	1	C3 H4 O3 S
522	glutamate degradation V (via hydroxyglutarate)	16	1	(R)-2-hydroxyglutaryl-CoA	0
523	glutamate degradation VI (to pyruvate)	9	1	mesaconate	0
524	histidine degradation VI	14	4	4-oxoglutaramate	2	C6 H12 N2 O2
				formyl-isoglutamine		C6 H8 N2 O4
				hydantoin-5-propionate
				L-isoglutamine
525	histidine degradation II	10	1	<i>N</i>-formyl-L-glutamate	0
526	isoleucine degradation II	10	2	2-methylbutanol	0
				2-methylbutanal
527	leucine degradation I	21	1	3-methylglutaconyl-CoA	0
528	leucine degradation II	9	2	&beta;-leucine	0
				&beta;-ketoisocaproate
529	lysine degradation III	17	1	2-keto-6-acetamidocaproate	0
530	lysine fermentation to acetate and butyrate	21	4	(3S,5S)-3,5-diaminohexanoate	0
				(S)-5-amino-3-oxohexanoate
				(3S)-3,6-diaminohexanoate
				L-3-aminobutyryl-CoA
531	lysine degradation IV	18	1	5-aminopentanamide	1	C5 H12 N2 O
532	lysine degradation VII	10	1	2-keto-6-aminocaproate	0
533	lysine degradation X	19	1	1-piperideine	0
534	methionine degradation III	10	2	3-methylthiopropanal	1	C4 H10 O S
				methionol
535	taurine degradation IV	8	1	aminoacetaldehyde	1	C2 H5 N O
536	phenylalanine degradation IV (mammalian, via side chain)	26	3	2-hydroxyphenylacetate	0
				phenylacetylglycine
				phenyllactate
537	tryptophan degradation V (side chain pathway)	17	6	indole-3-glyoxal	0
				indole-3-glycol aldehyde
				indole-3-glycol
				indole-3-glycolate
				indole-3-glyoxylate
				indole-3-ketol
538	tryptophan degradation to 2-amino-3-carboxymuconate semialdehyde	13	1	3-hydroxy-L-kynurenine	1	C10 H12 N2 O4
539	tryptophan degradation IV (via indole-3-lactate)	8	1	indole-3-lactate	0
540	tyrosine degradation III	12	1	tyrosol	0
541	tyrosine degradation I	13	2	4-fumaryl-acetoacetate	0
				4-maleyl-acetoacetate
542	valine degradation II	10	2	isobutanal	0
				isobutanol
543	valine degradation I	20	4	(<i>S</i>)-3-hydroxy-isobutyryl-CoA	0
				(<i>S</i>)-3-hydroxy-isobutyrate
				(S)-3-amino-2-methylpropanoate
				methylacrylyl-CoA
544	orthanilate degradation	13	2	orthanilate	1	C6 H7 N O3 S
				3-sulfocatechol
545	4-hydroxyphenylacetate degradation	20	1	2-hydroxy-5-carboxymethylmuconate semialdehyde	0
546	4-hydroxymandelate degradation	13	1	(R)-4-hydroxymandelate	0
547	4-toluenecarboxylate degradation	12	3	4-carboxybenzaldehyde	0
				4-carboxybenzyl alcohol
				(1R,2S)-dihydroxy-1,4-dicarboxy-3,5-cyclohexadiene
548	methylgallate degradation	12	1	3-<i>O</i>-methylgallate	0
549	orcinol degradation	11	3	acetylpyruvate	0
				2,3,5-trihydroxytoluene
				2,4,6-trioxoheptanoate
550	resorcinol degradation	10	1	resorcinol	0
551	aldoxime degradation	7	2	3-cyanopyridine	1	C6 H4 N2
				<I>E</I>-pyridine-3-aldoxime
552	dibenzo-<I>p</I>-dioxin degradation	11	4	dibenzo-<I>p</I>-dioxin	2	C12 H10 O6
				2,2',3-trihydroxydiphenyl-ether		C12 H8 O2
				6-(2-hydroxyphenoxy)-2-hydroxy-muconate
				4,4a-dihydroxy-dihydro-dibenzo-<I>p</I>-dioxin
553	dibenzofuran degradation	10	3	dibenzofuran	2	C12 H10 O3
				2,2',3-trihydroxybiphenyl		C12 H8 O
				2-hydroxy-6-oxo-6-(2-hydroxyphenyl)-hexa-2,4-dienoate
554	parathion degradation	7	2	diethylthiophosphate	2	C10 H14 N O5 P S
				parathion		C4 H11 O3 P S
555	<i>m</i>-xylene degradation (anaerobic)	10	4	3-methylbenzoyl-CoA	2	C33 H46 N7 O19 P3 S
				(3-methylbenzyl)succinate		C33 H48 N7 O19 P3 S
				(3-methylbenzyl)succinyl-CoA
				(3-methylphenyl)itaconyl-CoA
556	indole-3-acetate degradation to anthranilate	10	2	isatinate	0
				isatin
557	ethylbenzene degradation (anaerobic)	16	4	benzoyl-acetate	0
				ethylbenzene
				acetophenone
				S-1-phenylethanol
558	<I>p</I>-cumate degradation to 2-oxopent-4-enoate	13	4	<I>cis</I>-2,3-dihydroxy-2,3-dihydro-<I>p</I>-cumate	1	C10 H12 O6
				2,3-dihydroxy-<I>p</I>-cumate
				2-hydroxy-3-carboxy-6-oxo-7-methylocta-2,4-dienoate
				2-hydroxy-6-oxo-7-methyl-octa-2,4-dienoate
559	cyanurate degradation	7	1	biuret	1	C2 H5 N3 O2
560	naphthalene degradation	13	6	<i>cis</i> naphthalene dihydrodiol	2	C10 H8
				2-hydroxychromene-2-carboxylate		C10 H8 O2
				trans-O-hydroxybenzylidenepyruvate
				naphthalene
				1,2-dihydroxynaphthalene
				salicylaldehyde
561	benzene degradation	7	1	<i>cis</i>-1,2-dihydrobenzene-1,2-diol	0
562	methyl parathion degradation	5	2	methyl parathion	2	C2 H7 O3 P S
				dimethylthiophosphate		C8 H10 N O5 P S
563	paraoxon degradation	5	1	paraoxon	1	C10 H14 N O6 P
564	methylsalicylate degradation	9	2	4-methylsalicylate	0
				5-methylsalicylate
565	4-methylcatechol degradation (<i>ortho</i> cleavage)	15	6	3-methyl-<i>cis,cis</i>-muconate	0
				4-methylmuconolactone
				3-methylmuconolactone
				4-methyl-3-oxoadipate-enol-lactone
				4-methyl-3-oxoadipate
				4-methyl-3-oxoadipyl-CoA
566	gentisate degradation	8	1	3-fumarylpyruvate	0
567	5,5'-dehydrodivanillate degradation	13	5	5-carboxyvanillate	2	C15 H12 O10
				5,5'-dehydrodivanillate		C16 H14 O8
				2,2',3-trihydroxy-3'-methoxy-5,5'-dicarboxybiphenyl
				OH-DDVA <i>meta</i>-cleavage product
				4-carboxy-2-hydroxypenta-2,4-dienoate
568	dibenzothiophene desulfurization	11	4	dibenzothiophene	3	C12 H10 O3 S
				dibenzothiophene-5-oxide		C12 H8 O S
				dibenzothiophene-5,5-dioxide		C12 H8 S
				2'-hydroxybiphenyl-2-sulfinate
569	3-methylquinoline degradation	12	7	2-oxobut-3-enanoate	2	C10 H9 N
				3-methylquinoline		C4 H4 O3
				3-methyl-2-oxo-1,2-dihydroquinoline
				5,6-dihydrodiol-3-methyl-2-oxo-1,2-dihydroquinoline
				5,6-dihydroxy-3-methyl-2-oxo-1,2-dihydroquinoline
				3-methyl-5-hydroxy-6-(3-carboxy-3-oxopropenyl)-1<I>H</I>-2-pyridon
				2,5,6-trihydroxy-3-methylpyridine
570	<I>p</I>-cymene degradation to <I>p</I>-cumate	9	3	<I>p</I>-cymene	1	C10 H14
				<I>p</I>-cumic alcohol
				<I>p</I>-cumic aldehyde
571	biphenyl degradation	11	2	biphenyl	2	C12 H10
				cis-3-phenylcyclohexa-3,5-diene-1,2-diol		C12 H12 O2
572	phthalate degradation	9	1	3,4-dihydroxyphthalate	0
573	anthranilate degradation II (aerobic)	10	1	2-amino-5-oxocyclohex-1-enecarboxyl-CoA	1	C28 H43 N8 O18 P3 S
574	benzoate degradation I (aerobic)	8	1	(1<i>R</i>,6<i>S</i>)-1,6-dihydroxycyclohexa-2,4-diene-1-carboxylate	0
575	benzoyl-CoA degradation II (anaerobic)	15	2	6-hydroxycyclohex-1-ene-1-carboxyl-CoA	1	C28 H42 N7 O18 P3 S
				6-oxocyclohex-1-ene-1-carboxyl-CoA
576	benzoyl-CoA degradation III (anaerobic)	18	3	6-carboxyhex-2-enoyl-CoA	2	C28 H44 N7 O19 P3 S
				2-hydroxy-cyclohexane-1-carboxyl-CoA		C28 H46 N7 O18 P3 S
				2-ketocyclohexane-1-carboxyl-CoA
577	benzoyl-CoA degradation I (aerobic)	17	5	3,6-lactone of 3-hydroxyadinyl-CoA	2	C27 H44 N7 O18 P3 S
				cis-3,4-dehydroadipyl-CoA		C28 H42 N7 O19 P3 S
				3,4-dehydroadipyl-CoA semialdehyde
				2,3-dihydro-2,3-dihydroxybenzoyl-CoA
				trans-2,3-dehydroadipyl-coA
578	catechol degradation to &beta;-ketoadipate	8	2	cis,cis-muconate	0
				muconolactone
579	5-chloro-3-methyl-catechol degradation	3	1	2-methyl-<I>cis</I>-dienelactone	0
580	chlorosalicylate degradation	9	1	protoanemonin	1	C5 H4 O2
581	2,4,5-trichlorophenoxyacetate degradation	12	1	hydroxybenzoquinone	1	C6 H4 O3
582	3-chlorocatechol degradation I (<i>ortho</i>)	6	1	<i>trans</i>-dienelactone	0
583	fluorene degradation I	14	5	1,10-dihydro-1,10-dihydroxyfluoren-9-one	3	C13 H10 O3
				2-hydroxy-6-(2-carboxyphenyl)-6-oxo-2,4-hexadienoate		C13 H10 O6
				3-2-carboxyphenylcatechol		C13 H8 O
				9-fluorenone
				<i>cis</i>-2-hydroxypenta-2,4-dienoate
584	fluorene degradation II	8	1	(+)-(3S,4R)-cis-3,4-dihydroxy-3,4-dihydrofluorene	1	C13 H12 O2
585	gallate degradation I	10	1	4-carboxy-2-oxo-3-hexenedioate	0
586	gallate degradation III (anaerobic)	24	4	1,2,3,5-tetrahydroxybenzene	0
				dihydrophloroglucinol
				3-hydroxy-5-oxohexanoate
				3-hydroxy-5- oxohexanoyl-CoA
587	nicotinate degradation II	13	1	2,6-dihydroxynicotinate	0
588	nicotinate degradation III	18	7	(<i>R</i>)-3-methylitaconate	0
				2-methyleneglutarate
				6-oxo-1,4,5,6-tetrahydronicotinate
				(2R,3S)-2,3-dimethylmalate
				(<i>S</i>)-2-formylglutarate
				(<i>S</i>)-2-hydroxymethylglutarate
				dimethylmaleate
589	nicotinate degradation I	15	1	<i>N</i>-formylmaleamate	1	C5 H5 N O4
590	2,4,6-trinitrotoluene degradation	17	13	2-hydroxylamino-4,6-dinitrotoluene	7	C13 H17 N3 O10
				2-hydroxylamino-4,6-dinitrotoluene-O-glucoside		C13 H17 N3 O9
				2-hydroxylamino-4,6-dinitrotoluene-C-glucoside		C7 H5 N3 O5
				2-amino-4,6-dinitrotoluene		C7 H5 N3 O6
				2-NO-4,6-dinitrotoluene		C7 H6 N3 O5
				2-amino-4,6-dinitrotoluene glucoside		C7 H7 N3 O4
				4-NO-2,6-dinitrotoluene		C7 H7 N3 O5
				4-amino-2,6-dinitrotoluene
				4-amino-2,6-dinitrotoluene glucoside
				4-hydroxylamino-2,6-dinitrotoluene
				4-hydroxylamino-2,6-dinitrotoluene C-glucoside
				4-hydroxylamino-2,6-dinitrotoluene-O-glucoside
				2,4,6-trinitrotoluene
591	2,4-dinitrotoluene degradation	17	5	2,4-dinitrotoluene	0
				4-methyl-5-nitrocatechol
				2-hydroxy-5-methylquinone
				2,4,5-trihydroxytoluene
				2,4-dihydroxy-5-methyl-6-oxohexa-2,4-dienoate
592	2,6-dinitrotoluene degradation	11	4	2,6-dinitrotoluene	2	C5 H5 N O5
				3-methyl-4-nitrocatechol		C7 H7 N O6
				2-hydroxy-5-nitro-6-oxohepta-2,4-dienoate
				2-hydroxy-5-nitropenta-2,4-dienoate
593	2-nitrotoluene degradation	9	1	2-nitrotoluene	0
594	4-nitrotoluene degradation II	17	6	4-hydroxylaminotoluene	1	C7 H9 N O
				6-amino-m-cresol
				2-amino-5-methyl-muconate
				5-methyl-2-oxo-3-hexene-1,6-dioate
				2-oxo-4-hexenoate
				2-oxo-4-hydroxyhexanoate
595	nitrobenzene degradation I	7	1	hydroxyaminobenzene	0
596	4-nitrobenzoate degradation	6	1	4-hydroxylaminobenzoate	0
597	2-nitrobenzoate degradation II	11	2	2-nitrobenzoate	0
				2-hydroxylaminobenzoate
598	2-nitrophenol degradation	8	1	2-nitrophenol	0
599	4-nitrophenol degradation I	14	2	4-hydroxymuconic semialdehyde	0
				p-benzoquinone
600	4-nitrophenol degradation II	12	1	4-nitrocatechol	0
601	3-phenylpropionate and 3-(3-hydroxyphenyl)propionate degradation to 2-oxopent-4-enoate	12	4	3-(3-hydroxyphenyl)propionate	1	C9 H10 O6
				3-phenylpropionate
				<i>cis</i>-3-(carboxyethyl)-3,5-cyclohexadiene-1,2-diol
				2-hydroxy-6-oxonona-2,4-diene-1,9-dioate
602	4-ethylphenol degradation (anaerobic)	17	3	S-1-(4-hydroxyphenyl)-ethanol	0
				4-hydroxybenzoyl-acetate
				4-hydroxybenzoyl-acetyl-CoA
603	phenol degradation II (anaerobic)	11	1	phenol-phosphate	1	C6 H7 O4 P
604	phenylacetate degradation I (aerobic)	14	1	2-[(1R,6S)-1,6-dihydroxycyclohexa-2,4-dien-1-yl]acetyl-coA	1	C29 H44 N7 O19 P3 S
605	protocatechuate degradation I (<I>meta</I>-cleavage pathway)	15	2	2-hydroxy-4-carboxymuconate semialdehyde semiacetal	0
				2-hydroxy-4-carboxymuconate-6-semialdehyde
606	protocatechuate degradation II (ortho-cleavage pathway)	9	1	2-carboxy-5-oxo-2,5-dihydrofuran-2-acetate	0
607	protocatechuate degradation III (<I>para</I>-cleavage pathway)	12	1	2-hydroxy-5-carboxymuconate-6-semialdehyde	0
608	melamine degradation	6	3	melamine	3	C3 H4 N4 O2
				ammeline		C3 H5 N5 O
				ammelide		C3 H6 N6
609	<i>N</i>-cyclopropylmelamine degradation	8	4	<i>N</i>-cyclopropylmelamine	4	C3 H7 N
				<i>N</i>-cyclopropylammeline		C6 H10 N6
				<i>N</i>-cyclopropylammelide		C6 H8 N4 O2
				cyclopropylamine		C6 H9 N5 O
610	benzenesulfonate degradation	6	1	benzenesulfonate	1	C6 H6 O3 S
611	4-sulfocatechol degradation	9	3	4-sulfocatechol	1	C6 H6 O7 S
				3-sulfomuconate
				4-sulfomuconolactone
612	toluene degradation to benzoyl-CoA (anaerobic)	12	5	benzoylsuccinyl-CoA	1	C32 H46 N7 O19 P3 S
				(<i>R</i>)-2-benzylsuccinate
				(<i>R</i>)-benzylsuccinyl-CoA
				2-carboxymethyl-3-hydroxyphenylpropionyl-CoA
				<i>E</i>-phenylitaconyl-CoA
613	toluene degradation to 2-oxopent-4-enoate I (<I>via</I> <i>o</I>-cresol)	11	1	o-cresol	0
614	toluene degradation to 2-oxopent-4-enoate (<I>via</I> toluene-<I>cis</I>-diol)	11	1	toluene-<I>cis</I>-1,2-dihydrodiol	0
615	urate degradation to allantoin	9	1	5-hydroxy-2-oxo-4-ureido-2,5-dihydro-1H imidazole-5-carboxylate	1	C5 H6 N4 O5
616	<i>m</i>-xylene degradation to <i>m</i>-toluate	9	3	3-methylbenzyl alcohol	0
				3-methylbenzaldehyde
				<i>m</i>-toluate
617	<i>p</i>-xylene degradation to <i>p</i>-toluate	9	3	4-methylbenzyl alcohol	0
				<i>p</i>-xylene
				4-methylbenzaldehyde
618	formaldehyde oxidation III (mycothiol-dependent)	9	2	<i>S</i>-formylmycothiol	2	C18 H30 N2 O13 S
				<i>S</i>-hydroxymethylmycothiol		C18 H32 N2 O13 S
619	glucose degradation (oxidative)	10	1	6-phospho-2-dehydro-D-gluconate	0
620	fucose degradation	7	1	L-fuculose	0
621	L-lyxose degradation	8	1	&beta;-L-lyxopyranose	0
622	L-sorbose degradation	6	1	L-sorbose 1-phosphate	0
623	D-allose degradation	7	3	D-allose	0
				D-allose-6-phosphate
				D-allulose-6-phosphate
624	rhamnose degradation	7	2	L-rhamnulose	0
				L-rhamnulose-1-phosphate
625	ribose degradation	6	2	&beta;-D-ribofuranose	0
				&beta;-D-ribopyranose
626	D-arabinose degradation III	9	2	2-dehydro-3-deoxy-D-arabinonate	0
				D-arabinonate
627	L-arabinose degradation III	7	1	L-arabinonate	0
628	lactose degradation II	9	2	3'-ketolactose	0
				3-keto-&beta;-D-galactose
629	sucrose degradation II	8	2	3-dehydro-&alpha;-D-glucose	0
				3'-dehydro-&alpha;-D-glucosyl-&beta;-D-fructofuranoside
630	cyclohexane-1-carboxylate degradation (anaerobic)	8	2	cyclohexane-1-carboxylate	2	C28 H46 N7 O17 P3 S
				cyclohexane-1-carboxyl-CoA		C7 H12 O2
631	2-oxopentenoate degradation	10	1	4-hydroxy-2-oxo-valerate	0
632	propylene degradation	15	5	2-oxopropyl-CoM	2	C5 H10 O4 S2
				2-(R)-hydroxypropyl-CoM		C5 H12 O4 S2
				2-(S)-hydroxypropyl-CoM
				<i>(R)</i>-1,2-epoxypropane
				<i>(S)</i>-1,2-epoxypropane
633	itaconate degradation	11	1	itaconyl-CoA	0
634	nitrilotriacetate degradation	9	2	nitrilotriacetate	1	C6 H9 N O6
				iminodiacetate
635	citrate degradation	9	1	S-acetyl phosphopantetheine	1	C13 H25 N2 O8 P S
636	2-methylcitrate cycle II	15	1	2-methyl-<I>trans</I>-aconitate	0
637	chlorophyll <i>a</i> degradation	12	3	pyropheophorbide <i>a</i>	2	C33 H36 N4 O3
				red chlorophyll catabolite		C35 H40 N4 O7
				primary fluorescent chlorophyll catabolite
638	sphingosine and sphingosine-1-phosphate metabolism	11	2	2-trans-Hexadecenal	2	C16 H30 O
				sphingosine-1-phosphate		C18 H38 N O5 P
639	anandamide degradation	4	1	anandamide	1	C22 H37 N O2
640	oleate &beta;-oxidation	7	4	3,5-tetradecadienoyl-CoA	2	C14 H24 O2
				3,5-tetradecadienoate		C35 H58 N7 O17 P3 S
				2-<i>trans</i>,5-<i>cis</i>-tetradecadienoyl-CoA
				3-hydroxy-5-<i>cis</i>-tetradecenoyl-CoA
641	serotonin degradation	20	7	5-hydroxyindole acetaldehyde	3	C10 H11 N O5 S
				5-hydroxyindole acetate		C10 H12 N2 O4 S
				serotonin <i>O</i>-sulfate		C13 H14 N2 O3 S
				5-hydroxyindole thiazolidine carboxylate
				5-hydroxytryptophol
				5-hydroxytryptophol glucuronide
				5-hydroxytryptophol sulfate
642	noradrenaline and adrenaline degradation	20	8	3-methoxy-4-hydroxyphenylglycol	0
				normetanephrine
				3-methoxy-4-hydroxyphenylglycolaldehyde
				metanephrine
				3,4-dihydroxyphenylglycol
				3,4-dihydroxymandelate
				3,4-dihydroxyphenylglycolaldehyde
				vanillyl mandelate
643	melatonin degradation I	16	4	6-hydroxymelatonin	4	C12 H14 N2 O5 S
				6-sulfatoxymelatonin		C13 H16 N2 O3
				<i>N</i>-acetyl-serotonin glucuronide		C13 H16 N2 O6 S
				<i>N</i>-acetyl-serotonin sulfate		C18 H22 N2 O8
644	melatonin degradation II	11	4	5-methoxytryptamine	1	C11 H13 N O2
				5-methoxyindoleacetaldehyde
				5-methoxyindole acetate
				5-methoxytryptophol
645	melatonin degradation III	7	2	<i>N</i><sup>1</sup>-acetyl-<i>N</i><sup>2</sup>-formyl-5-methoxykynuramine	1	C12 H16 N2 O3
				<i>N</i>-acetyl-5-methoxykynurenamine
646	IAA degradation I	6	2	7-hydroxy-2-oxindole-3-acetic-acid	1	C16 H19 N O9
				7-hydroxy-2-oxindole-3-acetate glucoside
647	IAA degradation III	10	2	3-hydroxy-2-oxindole-3-acetyl-asp	2	C14 H14 N2 O7
				3-(O-&beta;-glucosyl)-2-oxindole-3-acetyl-asp		C20 H24 N2 O12
648	IAA degradation IV	11	1	2-oxindole-3-acetyl-beta-D-glucose	0
649	IAA conjugate biosynthesis II	13	3	indole-3-acetyl-N-beta-D-glucose	2	C20 H24 N2 O10
				indole-3-acetyl-aspartate-N-beta-D-glucose		C21 H26 N2 O10
				indole-3-acetyl-glutamate-N-beta-D-glucose
650	IAA degradation V	11	2	6-hydroxy-indole-3-acetyl-valine	1	C15 H18 N2 O4
				6-hydroxy-indole-3-acetyl-phenylalanine
651	IAA degradation VI	10	2	oxindole-3-acetyl-aspartate-N-beta-glucose	2	C20 H24 N2 O11
				oxindole-3-acetyl-aspartate-N-beta-glucosyl-beta-1,4-glucose		C26 H34 N2 O16
652	cytokinins degradation	14	2	3-methyl-4-<i>cis</i>-hydroxy-2-butenal	0
				3-methyl-4-<i>trans</i>-hydroxy-2-butenal
653	gibberellin inactivation I (2&beta;-hydroxylation)	24	10	gibberellin A8	2	C19 H22 O7
[truncated: 195 more rows]
