# Supplementary material for: Improved genome annotation through untargeted detection of pathway-specific metabolites
Source: BMC Genomics. 2011 Jun 15;12(Suppl 1):S6. doi: 10.1186/1471-2164-12-S1-S6 (PMC3223729; doi:10.1186/1471-2164-12-S1-S6)
Supplement: Additional file 2 — Table showing KEGG formulas not defined by HR2. [file 1471-2164-12-S1-S6-S2.xlsx]

## Sheet: temp
KEGG ID	FORMULA	MASS	DEGENERACY	NAME	H:C	N:C	O:C	P:C	S:C
C00002	C10H16N5O13P3	506.996	2	ATP;Adenosine 5'-triphosphate;	1.6	0.5	1.3	0	0.3
C00015	C9H14N2O12P2	404.002	1	UDP;Uridine 5'-diphosphate;	1.55556	0.222222	1.33333	0	0.222222
C00036	C4H4O5	132.006	3	Oxaloacetate;Oxalacetic acid;Oxaloacetic acid;2-Oxobutanedioic acid;Oxosuccinic acid;keto-Oxaloacetate;	1	0	1.25	0	0
C00044	C10H16N5O14P3	522.991	1	GTP;Guanosine 5'-triphosphate;	1.6	0.5	1.4	0	0.3
C00048	C2H2O3	74.0004	1	Glyoxylate;Glyoxalate;Glyoxylic acid;	1	0	1.5	0	0
C00053	C10H15N5O13P2S	506.986	2	3'-Phosphoadenylyl sulfate;3'-Phosphoadenosine 5'-phosphosulfate;3'-Phospho-5'-adenylyl sulfate;PAPS;	1.5	0.5	1.3	0.1	0.2
C00063	C9H16N3O14P3	482.985	1	CTP;Cytidine 5'-triphosphate;Cytidine triphosphate;	1.77778	0.333333	1.55556	0	0.333333
C00074	C3H5O6P	167.982	3	Phosphoenolpyruvate;Phosphoenolpyruvic acid;PEP;	1.66667	0	2	0	0.333333
C00075	C9H15N2O15P3	483.969	1	UTP;Uridine 5'-triphosphate;Uridine triphosphate;	1.66667	0.222222	1.66667	0	0.333333
C00081	C10H15N4O14P3	507.98	2	ITP;Inosine 5'-triphosphate;Inosine triphosphate;Inosine tripolyphosphate;	1.5	0.4	1.4	0	0.3
C00085	C6H13O9P	260.03	36	D-Fructose 6-phosphate;D-Fructose 6-phosphoric acid;Neuberg ester;	2.16667	0	1.5	0	0.166667
C00086	CH4N2O	60.0324	1	Urea;Carbamide;	4	2	1	0	0
C00092	C6H13O9P	260.03	36	D-Glucose 6-phosphate;Glucose 6-phosphate;Robison ester;	2.16667	0	1.5	0	0.166667
C00093	C3H9O6P	172.014	4	sn-Glycerol 3-phosphate;Glycerophosphoric acid;D-Glycerol 1-phosphate;Glycerol-3-phosphate;	3	0	2	0	0.333333
C00103	C6H13O9P	260.03	36	D-Glucose 1-phosphate;alpha-D-Glucose 1-phosphate;Cori ester;D-Glucose alpha-1-phosphate;	2.16667	0	1.5	0	0.166667
C00111	C3H7O6P	169.998	4	Glycerone phosphate;Dihydroxyacetone phosphate;	2.33333	0	2	0	0.333333
C00112	C9H15N3O11P2	403.018	1	CDP;Cytidine 5'-diphosphate;Cytidine diphosphate;	1.66667	0.333333	1.22222	0	0.222222
C00117	C5H11O8P	230.019	14	D-Ribose 5-phosphate;Ribose 5-phosphate;	2.2	0	1.6	0	0.2
C00118	C3H7O6P	169.998	4	D-Glyceraldehyde 3-phosphate;(2R)-2-Hydroxy-3-(phosphonooxy)-propanal;Glyceraldehyde 3-phosphate;	2.33333	0	2	0	0.333333
C00119	C5H13O14P3	389.952	2	5-Phospho-alpha-D-ribose 1-diphosphate;5-Phosphoribosyl diphosphate;5-Phosphoribosyl 1-pyrophosphate;PRPP;	2.6	0	2.8	0	0.6
C00129	C5H12O7P2	246.006	2	Isopentenyl diphosphate;delta3-Isopentenyl diphosphate;delta3-Methyl-3-butenyl diphosphate;	2.4	0	1.4	0	0.4
C00149	C4H6O5	134.022	4	(S)-Malate;L-Malate;L-Apple acid;L-Malic acid;L-2-Hydroxybutanedioic acid;Malate;Malic acid;	1.5	0	1.25	0	0
C00160	C2H4O3	76.016	1	Glycolate;Glycolic acid;Hydroxyacetic acid;	2	0	1.5	0	0
C00168	C3H4O4	104.011	3	Hydroxypyruvate;Hydroxypyruvic acid;3-Hydroxypyruvate;3-Hydroxypyruvic acid;	1.33333	0	1.33333	0	0
C00169	CH4NO5P	140.983	1	Carbamoyl phosphate;	4	1	5	0	1
C00189	C2H7NO	61.0528	1	Ethanolamine;Aminoethanol;2-Hydroxyethylamine;	3.5	0.5	0.5	0	0
C00197	C3H7O7P	185.993	3	3-Phospho-D-glycerate;D-Glycerate 3-phosphate;3-Phospho-(R)-glycerate;3-Phosphoglycerate;	2.33333	0	2.33333	0	0.333333
C00199	C5H11O8P	230.019	14	D-Ribulose 5-phosphate;	2.2	0	1.6	0	0.2
C00209	C2H2O4	89.9953	1	Oxalate;Oxalic acid;Ethanedioic acid;	1	0	2	0	0
C00227	C2H5O5P	139.988	2	Acetyl phosphate;	2.5	0	2.5	0	0.5
C00231	C5H11O8P	230.019	14	D-Xylulose 5-phosphate;	2.2	0	1.6	0	0.2
C00235	C5H12O7P2	246.006	2	Dimethylallyl diphosphate;Prenyl diphosphate;2-Isopentenyl diphosphate;delta2-Isopentenyl diphosphate;delta-Prenyl diphosphate;DMAPP;	2.4	0	1.4	0	0.4
C00236	C3H8O10P2	265.959	3	3-Phospho-D-glyceroyl phosphate;1,3-Bisphospho-D-glycerate;(R)-2-Hydroxy-3-(phosphonooxy)-1-monoanhydride with phosphoric;propanoic acid;	2.66667	0	3.33333	0	0.666667
C00245	C2H7NO3S	125.015	1	Taurine;2-Aminoethanesulfonic acid;Aminoethylsulfonic acid;	3.5	0.5	1.5	0.5	0
C00258	C3H6O4	106.027	1	D-Glycerate;Glycerate;(R)-Glycerate;Glyceric acid;	2	0	1.33333	0	0
C00275	C6H13O9P	260.03	36	D-Mannose 6-phosphate;	2.16667	0	1.5	0	0.166667
C00279	C4H9O7P	200.009	4	D-Erythrose 4-phosphate;	2.25	0	1.75	0	0.25
C00281	C7H15O10P	290.04	5	Sedoheptulose 7-phosphate;altro-Heptulose 7-phosphate;	2.14286	0	1.42857	0	0.142857
C00286	C10H16N5O13P3	506.996	2	dGTP;2'-Deoxyguanosine 5'-triphosphate;Deoxyguanosine 5'-triphosphate;Deoxyguanosine triphosphate;	1.6	0.5	1.3	0	0.3
C00345	C6H13O10P	276.025	2	6-Phospho-D-gluconate;	2.16667	0	1.66667	0	0.166667
C00346	C2H8NO4P	141.019	2	Ethanolamine phosphate;O-Phosphorylethanolamine;Phosphoethanolamine;O-Phosphoethanolamine;	4	0.5	2	0	0.5
C00352	C6H14NO8P	259.046	7	D-Glucosamine 6-phosphate;D-Glucosamine phosphate;	2.33333	0.166667	1.33333	0	0.166667
C00354	C6H14O12P2	339.996	11	D-Fructose 1,6-bisphosphate;	2.33333	0	2	0	0.333333
C00383	C3H4O4	104.011	3	Malonate;Malonic acid;Propanedioic acid;	1.33333	0	1.33333	0	0
C00446	C6H13O9P	260.03	36	alpha-D-Galactose 1-phosphate;alpha-D-Galactopyranose 1-phosphate;	2.16667	0	1.5	0	0.166667
C00447	C7H16O13P2	370.007	2	Sedoheptulose 1,7-bisphosphate;D-Sedoheptulose 1,7-bisphosphate;D-altro-Heptulose 1,7-biphosphate;	2.28571	0	1.85714	0	0.285714
C00458	C9H16N3O13P3	466.99	1	dCTP;Deoxycytidine 5'-triphosphate;Deoxycytidine triphosphate;2'-Deoxycytidine 5'-triphosphate;	1.77778	0.333333	1.44444	0	0.333333
C00459	C10H17N2O14P3	481.989	1	dTTP;Deoxythymidine triphosphate;Deoxythymidine 5'-triphosphate;TTP;	1.7	0.2	1.4	0	0.3
C00460	C9H15N2O14P3	467.974	1	dUTP;2'-Deoxyuridine 5'-triphosphate;	1.66667	0.222222	1.55556	0	0.333333
C00497	C4H6O5	134.022	4	(R)-Malate;D-Malate;D-Malic acid;	1.5	0	1.25	0	0
C00506	C3H7NO5S	169.005	1	L-Cysteate;L-Cysteic acid;3-Sulfoalanine;2-Amino-3-sulfopropionic acid;	2.33333	0.333333	1.66667	0.333333	0
C00519	C2H7NO2S	109.02	1	Hypotaurine;2-Aminoethanesulfinic acid;	3.5	0.5	1	0.5	0
C00552	C4H6O6	150.016	3	meso-Tartaric acid;meso-Tartrate;	1.5	0	1.5	0	0
C00593	C2H4O4S	123.983	1	Sulfoacetaldehyde;2-Sulfoacetaldehyde;	2	0	2	0.5	0
C00597	C3H7O7P	185.993	3	3-Phospho-DL-glycerate;DL-Glycerate 3-phosphate;3-Phosphoglycerate;	2.33333	0	2.33333	0	0.333333
C00603	C3H6N2O4	134.033	2	(-)-Ureidoglycolate;(S)-Ureidoglycolate;	2	0.666667	1.33333	0	0
C00606	C3H7NO4S	153.01	1	3-Sulfino-L-alanine;L-Cysteinesulfinic acid;3-Sulphino-L-alanine;3-Sulfinoalanine;	2.33333	0.333333	1.33333	0.333333	0
C00620	C5H11O8P	230.019	14	alpha-D-Ribose 1-phosphate;Ribose 1-phosphate;D-Ribose 1-phosphate;	2.2	0	1.6	0	0.2
C00623	C3H9O6P	172.014	4	Glycerol 1-phosphate;sn-Glycerol 1-phosphate;sn-Gro-1-P;L-Glycerol 1-phosphate;	3	0	2	0	0.333333
C00631	C3H7O7P	185.993	3	2-Phospho-D-glycerate;D-Glycerate 2-phosphate;	2.33333	0	2.33333	0	0.333333
C00636	C6H13O9P	260.03	36	D-Mannose 1-phosphate;alpha-D-Mannose 1-phosphate;	2.16667	0	1.5	0	0.166667
C00644	C6H15O9P	262.045	4	D-Mannitol 1-phosphate;	2.5	0	1.5	0	0.166667
C00660	C6H14O12P2	339.996	11	D-Glucose 1,6-bisphosphate;D-Glucose 1,6-biphosphate;	2.33333	0	2	0	0.333333
C00661	C3H7O6P	169.998	4	DL-Glyceraldehyde 3-phosphate;	2.33333	0	2	0	0.333333
C00663	C6H13O9P	260.03	36	beta-D-Glucose 1-phosphate;	2.16667	0	1.5	0	0.166667
C00665	C6H14O12P2	339.996	11	beta-D-Fructose 2,6-bisphosphate;D-Fructose 2,6-bisphosphate;	2.33333	0	2	0	0.333333
C00668	C6H13O9P	260.03	36	alpha-D-Glucose 6-phosphate;	2.16667	0	1.5	0	0.166667
C00672	C5H11O7P	214.024	4	2-Deoxy-D-ribose 1-phosphate;2-Deoxy-alpha-D-ribose 1-phosphate;	2.2	0	1.4	0	0.2
C00673	C5H11O7P	214.024	4	2-Deoxy-D-ribose 5-phosphate;	2.2	0	1.4	0	0.2
C00700	C10H15N4O15P3	523.975	1	XTP;	1.5	0.4	1.5	0	0.3
C00711	C4H6O5	134.022	4	Malate;Malic acid;2-Hydroxybutanedioic acid;	1.5	0	1.25	0	0
C00767	C6H10O8	210.038	5	Glucarate;Glucaric acid;	1.66667	0	1.33333	0	0
C00802	C3H4N2O4	132.017	1	Oxalureate;Oxaluric acid;Monooxalylurea;Oxalurate;	1.33333	0.666667	1.33333	0	0
C00818	C6H10O8	210.038	5	D-Glucarate;D-Glucaric acid;L-Gularic acid;d-Saccharic acid;D-Glucosaccharic acid;	1.66667	0	1.33333	0	0
C00830	C3H2O5	117.99	1	Oxomalonate;Oxomalonic acid;Ketomalonic acid;Mesoxalic acid;	0.666667	0	1.66667	0	0
C00872	C3H5NO4	119.022	2	Aminomalonate;	1.66667	0.333333	1.33333	0	0
C00879	C6H10O8	210.038	5	D-Galactarate;D-Mucic acid;D-Galactaric acid;	1.66667	0	1.33333	0	0
C00898	C4H6O6	150.016	3	(R,R)-Tartaric acid;(R,R)-Tartrate;L-Tartaric acid;Tartaric acid;Tartrate;2,3-Dihydroxybutanedioic acid;(2R,3R)-Tartaric acid;(+)-Tartaric acid;	1.5	0	1.5	0	0
C00975	C4H4O6	148.001	2	Dihydroxyfumarate;Dihydroxyfumaric acid;	1	0	1.5	0	0
C00986	C3H10N2	74.0844	1	1,3-Diaminopropane;Trimethylenediamine;1,3-Propanediamine;Propane-1,3-diamine;	3.33333	0.666667	0	0	0
C00988	C2H5O6P	155.982	1	2-Phosphoglycolate;Phosphoglycolic acid;	2.5	0	3	0	0.5
C01002	C6H13O9P	260.03	36	Hexose 1-phosphate;	2.16667	0	1.5	0	0.166667
C01005	C3H8NO6P	185.009	2	O-Phospho-L-serine;L-O-Phosphoserine;3-Phosphoserine;Dexfosfoserine;	2.66667	0.333333	2	0	0.333333
C01010	C2H4N2O3	104.022	1	Urea-1-carboxylate;Allophanate;Allophanic acid;	2	1	1.5	0	0
C01067	C6H12O9S	260.02	2	D-Galactose 6-sulfate;	2	0	1.5	0.166667	0
C01068	C5H13O8P	232.035	3	D-Ribitol 5-phosphate;Ribitol 5-phosphate;L-Ribitol 1-phosphate;	2.6	0	1.6	0	0.2
C01075	C6H13NO8S	259.036	1	N-Sulfo-D-glucosamine;	2.16667	0.166667	1.33333	0.166667	0
C01094	C6H13O9P	260.03	36	D-Fructose 1-phosphate;	2.16667	0	1.5	0	0.166667
C01095	C5H12O11P2	309.986	3	D-Ribose 5-diphosphate;	2.4	0	2.2	0	0.4
C01096	C6H15O9P	262.045	4	Sorbitol 6-phosphate;D-Sorbitol 6-phosphate;D-Glucitol 6-phosphate;	2.5	0	1.5	0	0.166667
C01097	C6H13O9P	260.03	36	D-Tagatose 6-phosphate;	2.16667	0	1.5	0	0.166667
C01099	C6H13O8P	244.035	4	L-Fuculose 1-phosphate;	2.16667	0	1.33333	0	0.166667
C01101	C5H11O8P	230.019	14	L-Ribulose 5-phosphate;	2.2	0	1.6	0	0.2
C01102	C4H10NO6P	199.025	4	O-Phospho-L-homoserine;	2.5	0.25	1.5	0	0.25
C01112	C5H11O8P	230.019	14	D-Arabinose 5-phosphate;	2.2	0	1.6	0	0.2
C01113	C6H13O9P	260.03	36	D-Galactose 6-phosphate;6-Phospho-D-galactose;	2.16667	0	1.5	0	0.166667
C01131	C6H13O8P	244.035	4	L-Rhamnulose 1-phosphate;	2.16667	0	1.33333	0	0.166667
C01143	C6H14O10P2	308.006	1	(R)-5-Diphosphomevalonate;	2.33333	0	1.66667	0	0.333333
C01146	C3H4O4	104.011	3	2-Hydroxy-3-oxopropanoate;Tartronate semialdehyde;	1.33333	0	1.33333	0	0
C01151	C5H12O11P2	309.986	3	D-Ribose 1,5-bisphosphate;Ribose 1,5-bisphosphate;	2.4	0	2.2	0	0.4
C01159	C3H8O10P2	265.959	3	2,3-Bisphospho-D-glycerate;2,3-Disphospho-D-glycerate;D-Greenwald ester;DPG;	2.66667	0	3.33333	0	0.666667
C01171	C6H13O9P	260.03	36	alpha-D-Hexose 1-phosphate;	2.16667	0	1.5	0	0.166667
C01172	C6H13O9P	260.03	36	beta-D-Glucose 6-phosphate;	2.16667	0	1.5	0	0.166667
C01177	C6H13O9P	260.03	36	Inositol 1-phosphate;myo-Inositol 1-phosphate;1D-myo-Inositol 1-phosphate;D-myo-Inositol 1-phosphate;1D-myo-Inositol 1-monophosphate;	2.16667	0	1.5	0	0.166667
C01182	C5H12O11P2	309.986	3	D-Ribulose 1,5-bisphosphate;	2.4	0	2.2	0	0.4
C01210	C3H10NO4P	155.035	3	N-Methylethanolamine phosphate;	3.33333	0.333333	1.33333	0	0.333333
C01218	C6H11O10P	274.009	4	6-Phospho-2-dehydro-D-gluconate;2-Dehydro-D-gluconate 6-phosphate;	1.83333	0	1.66667	0	0.166667
C01220	C6H14O12P2	339.996	11	1D-myo-Inositol 1,4-bisphosphate;D-myo-Inositol 1,4-bisphosphate;myo-Inositol 1,4-bisphosphate;Inositol 1,4-bisphosphate;	2.33333	0	2	0	0.333333
C01225	C9H19O11P	334.067	4	sn-glycero-3-Phospho-1-inositol;1-(sn-glycero-3-Phospho)-1D-myo-inositol;	2.11111	0	1.22222	0	0.111111
C01228	C10H17N5O17P4	602.957	1	Guanosine 3',5'-bis(diphosphate);Guanosine 3'-diphosphate 5'-diphosphate;Guanosine 5'-diphosphate,3'-diphosphate;	1.7	0.5	1.7	0	0.4
C01231	C6H14O12P2	339.996	11	alpha-D-Glucose 1,6-bisphosphate;alpha-D-Glucose 1,6-biphosphate;	2.33333	0	2	0	0.333333
C01236	C6H11O9P	258.014	5	D-Glucono-1,5-lactone 6-phosphate;6-Phospho-D-glucono-1,5-lactone;	1.83333	0	1.5	0	0.166667
C01243	C6H15O15P3	419.962	2	1D-myo-Inositol 1,3,4-trisphosphate;D-myo-Inositol 1,3,4-trisphosphate;Inositol 1,3,4-trisphosphate;	2.5	0	2.5	0	0.5
C01245	C6H15O15P3	419.962	2	D-myo-Inositol 1,4,5-trisphosphate;1D-myo-Inositol 1,4,5-trisphosphate;Inositol 1,4,5-trisphosphate;Ins(1,4,5)P3;	2.5	0	2.5	0	0.5
C01272	C6H16O18P4	499.929	4	1D-myo-Inositol 1,3,4,5-tetrakisphosphate;D-myo-Inositol 1,3,4,5-tetrakisphosphate;Inositol 1,3,4,5-tetrakisphosphate;	2.66667	0	3	0	0.666667
C01283	C6H14NO8P	259.046	7	1-Amino-1-deoxy-scyllo-inositol 4-phosphate;	2.33333	0.166667	1.33333	0	0.166667
C01286	C6H11O9P	258.014	5	2-Dehydro-3-deoxy-D-galactonate 6-phosphate;	1.83333	0	1.5	0	0.166667
C01345	C10H15N4O13P3	491.985	1	dITP;2'-Deoxyinosine-5'-triphosphate;2'-Deoxyinosine 5'-triphosphate;	1.5	0.4	1.3	0	0.3
C01346	C9H14N2O11P2	388.007	1	dUDP;2'-Deoxyuridine 5'-diphosphate;	1.55556	0.222222	1.22222	0	0.222222
C01348	C10H15N4O14P3	507.98	2	dXTP;	1.5	0.4	1.4	0	0.3
C01353	H2CO3	62.0004	1	Carbonic acid;Dihydrogen carbonate;H2CO3;	2	0	3	0	0
C01357	C6H10O8	210.038	5	Mucin;	1.66667	0	1.33333	0	0
C01444	C2H3NO3	89.0113	1	Oxamate;Oxamic acid;Oxalic monoamide;	1.5	0.5	1.5	0	0
C01563	CH3NO2	61.0164	1	Carbamate;Carbamic acid;Aminoformic acid;	3	1	2	0	0
C01620	C4H8O5	136.037	1	Threonate;L-Threonate;	2	0	1.25	0	0
C01678	C2H7NS	77.0299	1	Cysteamine;2-Aminoethanethiol;beta-Aminoethanethiol;beta-Mercaptoethylamine;Mercaptamine;Thioethanolamine;	3.5	0.5	0	0.5	0
C01705	C3H8NO5P	169.014	4	Glyphosate;	2.66667	0.333333	1.66667	0	0.333333
C01755	CHNS	58.983	1	Thiocyanate;Thiocyanic acid;	1	1	0	1	0
C01806	C10H16N5O13P3S	538.968	1	GTP-gamma-S;	1.6	0.5	1.3	0.1	0.3
C01807	C6H10O8	210.038	5	Galactarate;Mucic acid;Galactaric acid;	1.66667	0	1.33333	0	0
C01962	C3H7NO2S2	152.992	1	Thiocysteine;	2.33333	0.333333	0.666667	0.666667	0
C01990	C6H6O8	206.006	1	3-Oxalomalate;3-Oxalomalic acid;	1	0	1.33333	0	0
C02077	CH5N3O	75.0433	1	Semicarbazide;Carbamoylhydrazine;Aminourea;Hydrazinecarboxamide;	5	3	1	0	0
C02107	C4H6O6	150.016	3	(S,S)-Tartaric acid;(S,S)-Tartrate;D-Tartrate;D-Tartaric acid;(2S,3S)-Tartaric acid;(-)-Tartaric acid;	1.5	0	1.5	0	0
C02287	C3H4O5	120.006	2	Hydroxymalonate;Tartronic acid;Hydroxymalonic acid;	1.33333	0	1.66667	0	0
C02294	C2H7N3	73.064	1	Methylguanidine;	3.5	1.5	0	0	0
C02305	C4H10N3O5P	211.036	1	Phosphocreatine;N-Phosphocreatine;Creatine phosphate;	2.5	0.75	1.25	0	0.25
C02389	C6H5O2	109.029	2	p-Benzosemiquinone;4-Hydroxyphenoxy radical;	0.833333	0	0.333333	0	0
C02405	CH3O5P	125.972	2	Formyl phosphate;	3	0	5	0	1
C02500	C3H4O5	120.006	2	2-Hydroxymalonate;2-Hydroxymalonic acid;2-Tartronic acid;	1.33333	0	1.66667	0	0
C02527	C4H9O5P	168.019	2	Butanoylphosphate;Butanoyl phosphate;	2.25	0	1.25	0	0.25
C02532	C3H8NO6P	185.009	2	D-O-Phosphoserine;	2.66667	0.333333	2	0	0.333333
C02543	C3H6O6S	169.988	6	Glycerone sulfate;Dihydroxyacetone sulfate;	2	0	2	0.333333	0
C02703	C3H7NO6S	184.999	1	L-Serine O-sulfate;	2.33333	0.333333	2	0.333333	0
C02704	CH4O4S	111.983	1	Monomethyl sulfate;Methyl sulfate;	4	0	4	1	0
C02766	C3H6N2O4	134.033	2	(+)-Ureidoglycolate;(R)-Ureidoglycolate;	2	0.666667	1.33333	0	0
C02798	C3H5O6P	167.982	3	3-Phosphonopyruvate;	1.66667	0	2	0	0.333333
C02810	C6H15O9P	262.045	4	Alditol 6-phosphate;	2.5	0	1.5	0	0.166667
C02812	C6H8O9S	255.989	1	Ascorbate 2-sulfate;	1.33333	0	1.5	0.166667	0
C02827	C6H12O9S	260.02	2	D-Glucose 6-sulfate;	2	0	1.5	0.166667	0
C02855	C6H16N4O9P2	350.039	2	N-Phospho-D-lombricine;	2.66667	0.666667	1.5	0	0.333333
C02876	C3H7O5P	154.003	3	Propanoyl phosphate;Propionyl phosphate;	2.33333	0	1.66667	0	0.333333
C02884	C5H13O14P3	389.952	2	Ribose triphosphate;D-Ribose 5-triphosphate;	2.6	0	2.8	0	0.6
C02888	C6H13O9P	260.03	36	Sorbose 1-phosphate;L-Sorbose 1P;L-xylo-Hexulose 1-phosphate;L-Sorbose 1-phosphate;	2.16667	0	1.5	0	0.166667
C02895	C5H13O8P	232.035	3	Xylitol 5-phosphate;D-Xylitol 5-phosphate;	2.6	0	1.6	0	0.2
C02914	C3H6O6S	169.988	6	(S)-2-O-Sulfolactate;	2	0	2	0.333333	0
C02924	C3H8OS2	124.002	1	Dimercaprol;2,3-Mercaptopropanol;2,3-Dimercapto-1-propanol;British anti-lewisite;	2.66667	0	0.333333	0.666667	0
C02962	C6H13O9P	260.03	36	D-Allose 6-phosphate;	2.16667	0	1.5	0	0.166667
C02965	C6H13O9P	260.03	36	D-Hexose 6-phosphate;	2.16667	0	1.5	0	0.166667
C02976	C6H13O9P	260.03	36	Fructose 1-phosphate;	2.16667	0	1.5	0	0.166667
C02979	C3H9O6P	172.014	4	Glycerol 2-phosphate;	3	0	2	0	0.333333
C02985	C6H13O8P	244.035	4	L-Fucose 1-phosphate;6-Deoxy-L-galactose 1-phosphate;beta-L-Fucose 1-phosphate;	2.16667	0	1.33333	0	0.166667
C03064	C4H6O5	134.022	4	3-Dehydro-L-threonate;	1.5	0	1.25	0	0
C03082	C4H8NO7P	213.004	2	4-Phospho-L-aspartate;L-4-Aspartyl phosphate;	2	0.25	1.75	0	0.25
C03090	C5H12NO7P	229.035	1	5-Phosphoribosylamine;5-Phospho-beta-D-ribosylamine;5-Phospho-D-ribosylamine;5-Phosphoribosyl-1-amine;	2.4	0.2	1.4	0	0.2
C03109	C4H9O7P	200.009	4	D-Threose 4-phosphate;	2.25	0	1.75	0	0.25
C03126	C6H10O10S	274	1	L-Iduronate 2-sulfate;	1.66667	0	1.66667	0.166667	0
C03149	C3H10N3O6PS	247.003	1	N-Phosphotaurocyamine;Taurocyamine phosphate;N(omega)-Phosphotaurocyamine;	3.33333	1	2	0.333333	0.333333
C03166	C3H8N3O5P	197.02	1	Phosphoguanidinoacetate;Guanidinoacetate phosphate;	2.66667	1	1.66667	0	0.333333
C03167	C2H5O4P	123.993	1	Phosphonoacetaldehyde;2-Phosphonoacetaldehyde;	2.5	0	2	0	0.5
C03189	C3H9O6P	172.014	4	DL-Glyceryl 1-phosphate;DL-Glycerol 1-phosphate;rac-Glycerol 1-phosphate;	3	0	2	0	0.333333
C03232	C3H5O7P	183.977	1	3-Phosphonooxypyruvate;3-Phosphonooxypyruvic acid;3-Phosphohydroxypyruvate;3-Phosphohydroxypyruvic acid;	1.66667	0	2.33333	0	0.333333
C03251	C6H13O9P	260.03	36	Aldohexose 6-phosphate;	2.16667	0	1.5	0	0.166667
C03267	C6H13O9P	260.03	36	beta-D-Fructose 2-phosphate;beta-D-Fructofuranose 2-phosphate;	2.16667	0	1.5	0	0.166667
C03274	C6H15O8P	246.05	1	Glycerophosphoglycerol;	2.5	0	1.33333	0	0.166667
C03287	C5H10NO7P	227.019	3	L-Glutamyl 5-phosphate;L-Glutamate 5-phosphate;	2	0.2	1.4	0	0.2
C03291	C5H11O8P	230.019	14	L-Xylulose 5-phosphate;	2.2	0	1.6	0	0.2
C03339	C3H8O10P2	265.959	3	2,3-Bisphosphoglycerate;Greenwald ester;	2.66667	0	3.33333	0	0.666667
C03356	C4H9O8P	216.004	2	3-Phospho-D-erythronate;	2.25	0	2	0	0.25
C03384	C6H13O9P	260.03	36	D-Galactose 1-phosphate;	2.16667	0	1.5	0	0.166667
C03393	C4H9O8P	216.004	2	4-Phospho-D-erythronate;4-Phosphoerythronate;	2.25	0	2	0	0.25
C03394	C4H9O7P	200.009	4	Erythrulose 1-phosphate;	2.25	0	1.75	0	0.25
C03459	C4H4O6	148.001	2	2-Hydroxy-3-oxosuccinate;Oxaloglycolate;	1	0	1.5	0	0
C03483	C10H17N5O16P4	586.962	1	Adenosine tetraphosphate;Adenosine 5'-tetraphosphate;	1.7	0.5	1.6	0	0.4
C03494	C4H11O7P	202.024	1	D-Erythritol 4-phosphate;L-Erythritol 1-phosphate;	2.75	0	1.75	0	0.25
C03505	C3H7O5P	154.003	3	Hydroxyacetone phosphate;Acetol phosphate;	2.33333	0	1.66667	0	0.333333
C03509	C5H13O8P	232.035	3	L-Arabinitol 5-phosphate;	2.6	0	1.6	0	0.2
C03546	C6H13O9P	260.03	36	myo-Inositol 4-phosphate;D-myo-Inositol 4-phosphate;1D-myo-Inositol 4-phosphate;1D-myo-Inositol 4-monophosphate;Inositol 4-phosphate;	2.16667	0	1.5	0	0.166667
C03548	C4H4O5	132.006	3	trans-2,3-Epoxysuccinate;	1	0	1.25	0	0
C03557	C2H8NO3P	125.024	2	(2-Aminoethyl)phosphonate;2-Aminoethylphosphonate;Ciliatine;	4	0.5	1.5	0	0.5
C03568	C10H15N5O13P2S	506.986	2	2'-Phosphoadenylylsulfate;	1.5	0.5	1.3	0.1	0.2
C03576	C2H6O3S2	141.976	1	2-Mercaptoethanesulfonate;CoM;Coenzyme M;HS-CoM;	3	0	1.5	1	0
C03604	C4H9O7P	200.009	4	D-Erythrulose 4-phosphate;	2.25	0	1.75	0	0.25
C03606	C6H13O9P	260.03	36	D-Hamamelose 2(1)-phosphate;	2.16667	0	1.5	0	0.166667
C03614	C10H16N4O17P4	587.946	1	Inosine 5'-tetraphosphate;	1.6	0.4	1.7	0	0.4
C03654	C6H13O9P	260.03	36	(3S,4R)-Ketose 1-phosphate;	2.16667	0	1.5	0	0.166667
C03673	C13H20N5O16P3	595.012	1	3-(ADP)-2-phosphoglycerate;	1.53846	0.384615	1.23077	0	0.230769
C03693	C6H14O12P2	339.996	11	D-Mannose 1,6-bisphosphate;	2.33333	0	2	0	0.333333
C03734	C5H10NO7P	227.019	3	alpha-D-Glutamyl phosphate;	2	0.2	1.4	0	0.2
C03735	C6H13O9P	260.03	36	alpha-D-Hexose 6-phosphate;	2.16667	0	1.5	0	0.166667
C03736	C5H11O8P	230.019	14	alpha-D-Ribose 5-phosphate;	2.2	0	1.6	0	0.2
C03737	C5H11O8P	230.019	14	alpha-D-Xylose 1-phosphate;	2.2	0	1.6	0	0.2
C03754	C4H9O5P	168.019	2	2-Methylpropanoyl phosphate;2-Methylpropionyl phosphate;	2.25	0	1.25	0	0.25
C03782	C2H8NO3P	125.024	2	D-(1-Aminoethyl)phosphonate;D-(1-Aminoethyl)phosphonic acid;	4	0.5	1.5	0	0.5
C03783	C6H14NO8P	259.046	7	D-Galactosamine 1-phosphate;	2.33333	0.166667	1.33333	0	0.166667
C03785	C6H14O12P2	339.996	11	D-Tagatose 1,6-bisphosphate;	2.33333	0	2	0	0.333333
C03789	C6H13NO11S2	338.993	1	N,6-O-Disulfo-D-glucosamine;N2,6-Disulfo-D-glucosamine;	2.16667	0.166667	1.83333	0.333333	0
C03811	C6H13O9P	260.03	36	alpha-D-Glucose 3-phosphate;	2.16667	0	1.5	0	0.166667
C03853	C9H22O13P2	400.054	1	Bis(glycerophospho)-glycerol;	2.44444	0	1.44444	0	0.222222
C03894	C3H9O5P	156.019	1	Propane-1,2-diol 1-phosphate;	3	0	1.66667	0	0.333333
C03906	C5H11O8P	230.019	14	beta-L-Arabinose 1-phosphate;	2.2	0	1.6	0	0.2
C03920	C3H8O3S2	155.992	1	2-(Methylthio)ethanesulfonate;Methylcoenzyme M;Methyl CoM;	2.66667	0	1	0.666667	0
C03947	C3H7O5P	154.003	3	Glycerol 1,2-cyclic phosphate;	2.33333	0	1.66667	0	0.333333
C03961	C4H7NO5	149.032	2	erythro-3-Hydroxy-L-aspartate;erythro-3-Hydroxy-L-aspartic acid;	1.75	0.25	1.25	0	0
C03981	C4H4O5	132.006	3	2-Hydroxyethylenedicarboxylate;enol-Oxaloacetate;enol-Oxaloacetic acid;2-Hydroxybut-2-enedioic acid;	1	0	1.25	0	0
C04006	C6H13O9P	260.03	36	1D-myo-Inositol 3-phosphate;D-myo-Inositol 3-phosphate;myo-Inositol 3-phosphate;Inositol 3-phosphate;1D-myo-Inositol 3-monophosphate;D-myo-Inositol 3-monophosphate;myo-Inositol 3-monophosphate;Inositol 3-monophosphate;1L-myo-Inositol 1-phosphate;L-myo-Inositol 1-phosphate;	2.16667	0	1.5	0	0.166667
C04037	C6H11O10P	274.009	4	1-Phospho-alpha-D-galacturonate;D-Galacturonate 1-phosphate;	1.83333	0	1.66667	0	0.166667
C04062	C6H14O12P2	339.996	11	D-myo-Inositol 1,3-bisphosphate;1D-myo-Inositol 1,3-bisphosphate;myo-Inositol 1,3-bisphosphate;Inositol 1,3-bisphosphate;	2.33333	0	2	0	0.333333
C04063	C6H14O12P2	339.996	11	D-myo-Inositol 3,4-bisphosphate;1D-myo-Inositol 3,4-bisphosphate;Inositol 3,4-bisphosphate;	2.33333	0	2	0	0.333333
C04064	C6H14O12P2	339.996	11	D-myo-Inositol 4,5-bisphosphate;	2.33333	0	2	0	0.333333
C04111	C5H11N2O7P	242.03	1	3-(Phosphoacetylamido)-L-alanine;	2.2	0.4	1.4	0	0.2
C04122	C3H10NO4P	155.035	3	D-1-Aminopropan-2-ol O-phosphate;(R)-1-Aminopropan-2-yl phosphate;	3.33333	0.333333	1.33333	0	0.333333
C04126	C3H10NO4P	155.035	3	L-1-Aminopropan-2-ol O-phosphate;(S)-1-Aminopropan-2-yl phosphate;	3.33333	0.333333	1.33333	0	0.333333
C04175	C5H12O10P2	293.991	2	2-Deoxy-D-ribose 1,5-bisphosphate;	2.4	0	2	0	0.4
C04234	C6H13O10P	276.025	2	2-Carboxy-D-arabinitol 1-phosphate;	2.16667	0	1.66667	0	0.166667
C04299	C6H11O8P	242.019	2	D-myo-Inositol 1,2-cyclic phosphate;1D-myo-Inositol 1,2-cyclic phosphate;	1.83333	0	1.33333	0	0.166667
C04309	C4H7O7P	197.993	1	Phosphoenol-4-deoxy-3-tetrulosonate;	1.75	0	1.75	0	0.25
C04336	C8H16NO10P	317.051	1	N-Glycolyl-D-mannosamine 6-phosphate;	2	0.125	1.25	0	0.125
C04359	C7H15O9P	274.045	1	1-Deoxy-D-altro-heptulose 7-phosphate;	2.14286	0	1.28571	0	0.142857
C04399	C4H9O6PS	215.986	1	S-Methyl-3-phospho-1-thio-D-glycerate;	2.25	0	1.5	0.25	0.25
C04442	C6H11O9P	258.014	5	2-Dehydro-3-deoxy-6-phospho-D-gluconate;6-Phospho-2-dehydro-3-deoxy-D-gluconate;2-Keto-3-deoxy-6-phosphogluconate;2-Dehydro-3-deoxy-D-gluconate 6-phosphate;	1.83333	0	1.5	0	0.166667
C04456	C6H11O9P	258.014	5	6-Phospho-5-dehydro-2-deoxy-D-gluconate;5-Dehydro-2-deoxy-D-gluconate 6-phosphate;	1.83333	0	1.5	0	0.166667
C04461	C8H17NO12P2	381.023	1	N-Acetyl-D-glucosamine 1,6-bisphosphate;N-Acetyl-alpha-D-glucosamine 1,6-bisphosphate;	2.125	0.125	1.5	0	0.25
C04477	C6H16O18P4	499.929	4	1D-myo-Inositol 1,3,4,6-tetrakisphosphate;D-myo-Inositol 1,3,4,6-tetrakisphosphate;Inositol 1,3,4,6-tetrakisphosphate;	2.66667	0	3	0	0.666667
C04478	C8H15O11P	318.035	1	3-Deoxy-D-manno-octulosonate 8-phosphate;2-Dehydro-3-deoxy-D-octonate 8-phosphate;	1.875	0	1.375	0	0.125
C04503	C4H13N3O7P2	277.023	1	N'-Phosphoguanidinoethyl methyl phosphate;	3.25	0.75	1.75	0	0.5
C04520	C6H16O18P4	499.929	4	1D-myo-Inositol 3,4,5,6-tetrakisphosphate;D-myo-Inositol 3,4,5,6-tetrakisphosphate;Inositol 3,4,5,6-tetrakisphosphate;	2.66667	0	3	0	0.666667
C04641	C9H19O11P	334.067	4	2-(alpha-D-Galactosyl)-sn-glycerol 3-phosphate;	2.11111	0	1.22222	0	0.111111
C04674	C12H21NO17S2	515.025	1	3-D-Glucuronosyl-N2,6-disulfo-beta-D-glucosamine;	1.75	0.0833333	1.41667	0.166667	0
C04691	C7H13O10P	288.025	1	2-Dehydro-3-deoxy-D-arabino-heptonate 7-phosphate;3-Deoxy-D-arabino-hept-2-ulosonate 7-phosphate;3-Deoxy-arabino-heptulonate 7-phosphate;3-Deoxy-D-arabino-heptulosonic acid 7-phosphate;DAHP;2-Dahp;	1.85714	0	1.42857	0	0.142857
C04703	C9H19O11P	334.067	4	alpha-D-Galactosyl-(1,1')-sn-glycerol 3-phosphate;	2.11111	0	1.22222	0	0.111111
C04752	C6H11N3O7P2	299.007	1	2-Methyl-4-amino-5-hydroxymethylpyrimidine diphosphate;4-Amino-2-methyl-5-diphosphomethylpyrimidine;	1.83333	0.5	1.16667	0	0.333333
C04895	C9H16N5O13P3	494.996	1	2-Amino-4-hydroxy-6-(erythro-1,2,3-trihydroxypropyl)dihydropteridine;triphosphate;6-(L-erythro-1,2-Dihydroxypropyl 3-triphosphate)-7,8-dihydropterin;6-[(1S,2R)-1,2-Dihydroxy-3-triphosphooxypropyl]-7,8-dihydropterin;7,8-Dihydroneopterin 3'-triphosphate;	1.77778	0.555556	1.44444	0	0.333333
C05000	C6H13O9P	260.03	36	Fructose 1-phosphate(furanose);	2.16667	0	1.5	0	0.166667
C05001	C6H13O9P	260.03	36	Fructose 1-phosphate(pyranose);	2.16667	0	1.5	0	0.166667
C05060	C6H5O2	109.029	2	o-Benzosemiquinone;2-Hydroxyphenoxy radical;	0.833333	0	0.333333	0	0
C05123	C2H6O4S	125.999	1	2-Hydroxyethanesulfonate;2-Hydroxyethanesulfonic acid;2-Hydroxyethane-1-sulfonic acid;Isethionic acid;Isethionate;	3	0	2	0.5	0
C05345	C6H13O9P	260.03	36	beta-D-Fructose 6-phosphate;	2.16667	0	1.5	0	0.166667
C05378	C6H14O12P2	339.996	11	beta-D-Fructose 1,6-bisphosphate;	2.33333	0	2	0	0.333333
C05382	C7H15O10P	290.04	5	Sedoheptulose 7-phosphate;D-Sedoheptulose 7-phosphate;D-altro-Heptulose 7-phosphate;	2.14286	0	1.42857	0	0.142857
C05385	C6H11O10P	274.009	4	D-Glucuronate 1-phosphate;1-Phospho-alpha-D-glucuronate;	1.83333	0	1.66667	0	0.166667
C05527	C3H4O5S	151.978	1	3-Sulfinylpyruvate;3-Sulfinopyruvate;	1.33333	0	1.66667	0.333333	0
C05528	C3H4O6S	167.973	1	3-Sulfopyruvate;3-Sulfopyruvic acid;	1.33333	0	2	0.333333	0
C05669	C3H5NO4	119.022	2	beta-Nitropropanoate;beta-Nitropropanoic acid;beta-Nitropropionic acid;	1.66667	0.333333	1.33333	0	0
C05672	C3H8NO5P	169.014	4	2-Amino-3-phosphonopropanoate;Phosphonoalanine;	2.66667	0.333333	1.66667	0	0.333333
C05678	C2H8NO4P	141.019	2	1-Hydroxy-2-aminoethylphosphonate;	4	0.5	2	0	0.5
C05679	C3H10NO3P	139.04	1	N-Monomethyl-2-aminoethylphosphonate;2-Methylaminoethylphosphonate;	3.33333	0.333333	1	0	0.333333
C05682	C2H5O5P	139.988	2	Phosphonoacetate;Phosphonoacetic acid;Fosfonet;	2.5	0	2.5	0	0.5
C05702	C4H10NO6P	199.025	4	O-Phosphorylhomoserine;	2.5	0.25	1.5	0	0.25
C05765	C5H10NO7P	227.019	3	L-Glutamyl 1-phosphate;alpha-L-Glutamyl phosphate;	2	0.2	1.4	0	0.2
C05824	C3H7NO5S2	200.977	1	S-Sulfo-L-cysteine;	2.33333	0.333333	1.66667	0.666667	0
C05922	C10H18N5O15P3	541.001	1	Formamidopyrimidine nucleoside triphosphate;	1.8	0.5	1.5	0	0.3
C05923	C9H18N5O14P3	513.006	2	2,5-Diaminopyrimidine nucleoside triphosphate;	2	0.555556	1.55556	0	0.333333
C06019	C6H13O9P	260.03	36	D-arabino-3-Hexulose 6-phosphate;D-arabino-6-Phospho-hex-3-ulose;	2.16667	0	1.5	0	0.166667
C06054	C4H7O8P	213.988	1	2-Oxo-3-hydroxy-4-phosphobutanoate;alpha-Keto-3-hydroxy-4-phosphobutyrate;(3R)-3-Hydroxy-2-oxo-4-phosphonooxybutanoate;	1.75	0	2	0	0.25
C06055	C4H10NO7P	215.019	1	O-Phospho-4-hydroxy-L-threonine;4-(Phosphonooxy)-threonine;4-(Phosphonooxy)-L-threonine;	2.5	0.25	1.75	0	0.25
C06148	C9H18N5O14P3	513.006	2	2,5-Diamino-6-(5'-triphosphoryl-3',4'-trihydroxy-2'-oxopentyl)-;amino-4-oxopyrimidine;	2	0.555556	1.55556	0	0.333333
C06155	C6H13O9P	260.03	36	L-myo-Inositol 5-phosphate;	2.16667	0	1.5	0	0.166667
C06156	C6H14NO8P	259.046	7	alpha-D-Glucosamine 1-phosphate;D-Glucosamine 1-phosphate;	2.33333	0.166667	1.33333	0	0.166667
C06189	C3H6O9P2	247.949	1	Cyclic 2,3-bisphospho-D-glycerate;Cyclic 2,3-diphospho-D-glycerate;Cyclic glycerate-2,3P2;cDPG;	2	0	3	0	0.666667
C06222	C7H15O10P	290.04	5	Sedoheptulose 1-phosphate;altro-Heptulose 1-phosphate;	2.14286	0	1.42857	0	0.142857
C06238	C5H11O8P	230.019	14	L-Arabinose 1-phosphate;	2.2	0	1.6	0	0.2
C06239	C5H11O8P	230.019	14	alpha-L-Arabinose 1-phosphate;	2.2	0	1.6	0	0.2
C06248	C5H12O10P2	293.991	2	D-Ribose 1-diphosphate;	2.4	0	2	0	0.4
C06311	C6H15O9P	262.045	4	Galactitol 1-phosphate;D-Galactitol 1-phosphate;L-Galactitol 6-phosphate;	2.5	0	1.5	0	0.166667
C06312	C6H13O9P	260.03	36	L-Tagatose 6-phosphate;	2.16667	0	1.5	0	0.166667
C06367	C4H5O7P	195.977	1	1-Carboxyvinyl carboxyphosphonate;Carboxyphosphonoenolpyruvate;	1.25	0	1.75	0	0.25
C06368	C3H5O5P	151.988	1	3-(Hydrohydroxyphosphoryl)pyruvate;(Hydroxyphosphinyl)pyruvate;	1.66667	0	1.66667	0	0.333333
C06369	C6H13O8P	244.035	4	2-Deoxy-D-glucose 6-phosphate;	2.16667	0	1.33333	0	0.166667
C06377	C6H14NO8P	259.046	7	D-Galactosamine 6-phosphate;	2.33333	0.166667	1.33333	0	0.166667
C06383	C2H7N3O	89.0589	1	N-(Aminomethyl)urea;	3.5	1.5	0.5	0	0
C06441	C5H11O8P	230.019	14	L-Xylulose 1-phosphate;	2.2	0	1.6	0	0.2
C06451	C2H7O4P	126.008	1	2-Hydroxyethylphosphonate;	3.5	0	2	0	0.5
C06452	C3H9O4P	140.024	1	2-Hydroxypropylphosphonate;	3	0	1.33333	0	0.333333
C06454	C3H7O4P	138.008	1	Phosphonomycin;Fosfomycin;	2.33333	0	1.33333	0	0.333333
C06455	CH5O4P	111.993	1	Hydroxymethylphosphonate;	5	0	4	0	1
C06456	CH3O5P	125.972	2	Phosphonoformate;Foscarmet;Foscarnet;	3	0	5	0	1
C06814	C5H11O8P	230.019	14	D-Xylose-5-phosphate;	2.2	0	1.6	0	0.2
C06893	C6H11O9P	258.014	5	2-Deoxy-5-keto-D-gluconic acid 6-phosphate;DKHP;	1.83333	0	1.5	0	0.166667
C07024	C10H14N5O13P3	504.98	1	3'-Keto-3'-deoxy-ATP;	1.4	0.5	1.3	0	0.3
C07044	CH4N2O2	76.0273	1	Hydroxyurea;Hydroxycarbamide;	4	2	2	0	0
C07280	C3H3NOS2	132.966	1	Rhodanine;2-Thioxo-4-thiazolidinone;	1	0.333333	0.333333	0.666667	0
C07335	C4H8NO7P	213.004	2	2-Amino-3-oxo-4-phosphonooxybutyrate;L-2-Amino-3-oxo-4-phosphonooxybutyrate;(2S)-2-Amino-3-oxo-4-phosphonooxybutanoate;	2	0.25	1.75	0	0.25
C07395	C3H11NO7P2	235.001	1	Pamidronate;Pamidronic acid;	3.66667	0.333333	2.33333	0	0.666667
C07672	C2H7N5	101.07	1	Biguanide;	3.5	2.5	0	0	0
C07707	C19H32N2O5. C4H11N	441.32	1	Perindopril erbumine;	2.75	0.25	1.25	0	0
C07736	C2H8O7P2	205.975	1	Etidronic acid;1-Hydroxyethylidene-1,1-diphosphonic acid;Ethane-1-hydroxy-1,1-bisphosphonate;	4	0	3.5	0	1
C07752	C4H13NO7P2	249.017	1	Alendronic acid;Alendronate;(4-Amino-1-hydroxybutylidene)bisphosphonic acid;	3.25	0.25	1.75	0	0.5
C07836	C7H15O10P	290.04	5	D-glycero-D-manno-Heptose 7-phosphate;	2.14286	0	1.42857	0	0.142857
C07838	C7H15O10P	290.04	5	D-glycero-D-manno-Heptose 1-phosphate;	2.14286	0	1.42857	0	0.142857
C08371	C2H6S2	93.9911	1	Dimethyl disulfide;Methyl disulfide;	3	0	0	1	0
C08372	C2H6S3	125.963	1	Dimethyl trisulfide;	3	0	0	1.5	0
C08382	C2H4S5	187.892	1	Lenthionine;	2	0	0	2.5	0
C10517	C9H19O11P	334.067	4	2-(beta-D-Glucosyl)-sn-glycerol 3-phosphate;	2.11111	0	1.22222	0	0.111111
C10917	C5H11NS5	244.95	1	7-N,N-Dimethylamino-1,2,3,4,5-pentathiocyclooctane;PTCA;	2.2	0.2	0	1	0
C10922	C3H8O3S3	187.964	1	2,3-Dimercaptopropane-1-sulfonic acid;DMPS;	2.66667	0	1	1	0
C11033	CH6NO3P	111.008	1	AMPA;1-Aminomethylphosphonic acid;	6	1	3	0	1
C11039	C10H18N3O14P3	497	1	2'-Deoxy-5-hydroxymethylcytidine-5'-triphosphate;	1.8	0.3	1.4	0	0.3
C11105	C4H5NO5S	178.989	1	5-Methyl-3-isoxazolyl sulfate;HS;	1.25	0.25	1.25	0.25	0
C11145	CH4SO3	95.9881	1	Methanesulfonic acid;	4	0	3	1	0
C11160	C6H12N2S4	239.988	1	Tetramethylthioperoxydicarbonic diamide;Thiram;	2	0.333333	0	0.666667	0
C11214	CH6N4S	106.031	1	Thiocarbohydrazide;1,3-Diamino-2-thiourea;	6	4	0	1	0
C11434	C5H13O7P	216.04	1	2-C-Methyl-D-erythritol 4-phosphate;	2.6	0	1.4	0	0.2
C11436	C14H26N3O17P3	601.048	1	2-Phospho-4-(cytidine 5'-diphospho)-2-C-methyl-D-erythritol;	1.85714	0.214286	1.21429	0	0.214286
C11437	C5H11O7P	214.024	4	1-Deoxy-D-xylulose 5-phosphate;	2.2	0	1.4	0	0.2
C11453	C5H12O9P2	277.996	1	2-C-Methyl-D-erythritol 2,4-cyclodiphosphate;3-Methyl-1,2,3,4-tetrahydroxybutane-1,3-cyclic bisphosphate;	2.4	0	1.8	0	0.4
C11472	C7H16O13P2	370.007	2	D-glycero-D-manno-Heptose 1,7-bisphosphate;	2.28571	0	1.85714	0	0.285714
C11499	C3H6O6S	169.988	6	(S)-3-Sulfolactate;	2	0	2	0.333333	0
C11511	C4H7NO5	149.032	2	threo-3-Hydroxy-L-aspartate;L-threo-3-Hydroxyaspartate;	1.75	0.25	1.25	0	0
C11516	C9H17O12P	348.046	2	2-(alpha-D-Mannosyl)-3-phosphoglycerate;	1.88889	0	1.33333	0	0.111111
C11536	C3H7O9PS	249.955	1	(2R)-O-Phospho-3-sulfolactate;(2R)-Phosphosulfolactate;	2.33333	0	3	0.333333	0.333333
C11537	C3H6O6S	169.988	6	(2R)-3-Sulfolactate;	2	0	2	0.333333	0
C11555	C6H16O18P4	499.929	4	1D-myo-Inositol 1,4,5,6-tetrakisphosphate;D-myo-Inositol 1,4,5,6-tetrakisphosphate;Inositol 1,4,5,6-tetrakisphosphate;	2.66667	0	3	0	0.666667
C11638	C3H8NO5P	169.014	4	3-Amino-2-oxopropyl phosphate;1-Amino-3-(phosphohydroxy)propan-2-one;	2.66667	0.333333	1.66667	0	0.333333
C11811	C5H12O8P2	262.001	1	1-Hydroxy-2-methyl-2-butenyl 4-diphosphate;(E)-4-Hydroxy-3-methylbut-2-en-1-yl diphosphate;	2.4	0	1.6	0	0.4
C12021	C3H8NO5P	169.014	4	Alanylphosphate;D-Alanyl-phosphate;	2.66667	0.333333	1.66667	0	0.333333
C12022	C6H15NO7P2	275.032	1	Phosphophosphinate;	2.5	0.166667	1.16667	0	0.333333
C12106	C7H14NO9P	287.041	1	AminoDAHP;	2	0.142857	1.28571	0	0.142857
C12147	C4H10NO6P	199.025	4	L-Threonine O-3-phosphate;L-Threonine phosphate;	2.5	0.25	1.5	0	0.25
C12213	C6H14NO8P	259.046	7	Kanosamine 6-phosphate;D-Kanosamine 6-phosphate;	2.33333	0.166667	1.33333	0	0.166667
C12214	C6H14NO8P	259.046	7	Aminofructose 6-phosphate;Amino-D-fructose 6-phosphate;	2.33333	0.166667	1.33333	0	0.166667
C12215	C4H10NO6P	199.025	4	Iminoerythrose 4-phosphate;Imino-D-erythrose 4-phosphate;	2.5	0.25	1.5	0	0.25
C12347	C5H13O13P3	373.957	1	Deoxyribose triphosphate;	2.6	0	2.6	0	0.6
C12959	C20H26N2. C4H6O6	444.226	1	Dimetacrine tartrate;Dimetacrine bitartrate;	1.5	0.5	1.5	0	0
C14178	C6H16N4O9P2	350.039	2	N-Phospholombricine;N-Phospho-L-lombricine;	2.66667	0.666667	1.5	0	0.333333
C14179	C2H4O5S	139.978	1	Sulfoacetate;Sulfoacetic acid;	2	0	2.5	0.5	0
C14415	CH4N2S	76.0095	1	Thiourea;	4	2	0	1	0
C14873	C4H6O5S	165.994	1	Thiodiacetic acid sulfoxide;	1.5	0	1.25	0.25	0
C14899	C6H11O10P	274.009	4	3-Dehydro-L-gulonate 6-phosphate;	1.83333	0	1.66667	0	0.166667
C15556	C4H9O6P	184.014	1	3,4-Dihydroxy-2-butanone 4-phosphate;	2.25	0	1.5	0	0.25
C15924	C6H13O9P	260.03	36	L-Gulose 1-phosphate;	2.16667	0	1.5	0	0.166667
C15926	C6H13O9P	260.03	36	L-Galactose 1-phosphate;	2.16667	0	1.5	0	0.166667
C16069	C3H6O6S	169.988	6	3-Sulfolactate;	2	0	2	0.333333	0
C16186	C6H9O9P	255.998	1	L-Ascorbate 6-phosphate;	1.5	0	1.5	0	0.166667
C16511	C4H9NO5S	183.02	1	L-Homocysteic acid;(2S)-2-Amino-4-sulfobutanoic acid;	2.25	0.25	1.25	0.25	0
C16617	C10H15N4O13P3S	523.957	1	6-Mercaptopurine ribonucleoside triphosphate;6-Thioinosine-5'-triphosphate;	1.5	0.4	1.3	0.1	0.3
C16637	C5H11O7P	214.024	4	5-Deoxyribose-1-phosphate;5-Deoxy-alpha-D-ribose-1-phosphate;	2.2	0	1.4	0	0.2
C16670	C3H7O6P	169.998	4	Glyceraldehyde-3-phosphate;	2.33333	0	2	0	0.333333
C16699	C9H17O12P	348.046	2	2-O-(6-Phospho-alpha-mannosyl)-D-glycerate;	1.88889	0	1.33333	0	0.111111
C16848	C6H11O8P	242.019	2	6-Deoxy-5-ketofructose 1-phosphate;	1.83333	0	1.33333	0	0.166667
C16849	C3H5O6P	167.982	3	Hydroxypyruvaldehyde phosphate;	1.66667	0	2	0	0.333333
C17205	C3H6O6S	169.988	6	(R)-2-O-Sulfolactate;	2	0	2	0.333333	0
